# Supplementary material for: RNA-seq reveals potential gene biomarkers in fathead minnows (Pimephales promelas) for exposure to treated wastewater effluent
Source: Royal Society of Chemistry journal article supplement (doi:10.1039/d2em00222a), 2022-01-01
Supplement: d2em00222a2.xlsx [file d2em00222a2.xlsx]

## Sheet: Male Gene Lists
DEGs	MEred	MEred and DEGs	MEred Hub Genes	MEred Hub Genes and DEGs	MEred MCODE Cluster	MEred MCODE Cluster and Hub Gene	MEgreenyellow	MEgreenyellow and DEGs	MEgreenyellow Hub Genes	MEgreenyellow Hub Genes and DEGs	MEgreenyellow MCODE Cluster	MEgreenyellow MCODE Cluster and Hub Gene
u2af2b	maco1a	mark3b	atp6v0a1b	LOC120494102	rab11a		cry2	eif3c	cry2	u2af2b	hsp90b1	hspa4a
u2af2b	si:dkey-19e4.5	cep162	LOC120494102	edil3b	rab10		nr1d2b	cops2	nr1d2b	serpinh1b	hsf2	dnajb1a
rbp2a	mfap3l	myo1ha	edil3b	hnrnpm	rab33a		per1b	u2af2b	per1b	dnaja	hspa4a	hspa5		*Bolded genes are also DEGs
LOC120484319	mfap3l	LOC120469454	arl8a		mapk9		eif3c	dnaja	eif3c	med16	hsf1	dnajb1b
LOC120486253	asph	ylpm1	hnrnpm		bcl2b		cops2	st8sia5	cops2	LOC120486364	dnajb1a	fkbp4
LOC120484307	avpi1	LOC120494102	tomm70a		mapk8a		eif3c	celf3a	u2af2b	hsp90aa1.2	hspa5	dnaja1
LOC120493278	cul4b	cnot7	kdsr		bcl2l1		u2af2b	dnajb1a	dnaja	eif3c	dnajb1b	hsp90aa1.2
LOC120465314	mfsd14ba	si:ch211-40k21.5	vamp2		mapk8b		dnaja	hmgb3a	st8sia5	dnajb1b	dnajc3	serpinh1b
znf384a	nudt17	kansl3	twf1a		RAB43		st8sia5	chd4a	celf3a	hspa5	hsp70.3
LOC120480077	dnajc7	hnrnpm	ppp3ccb		zgc:165464		celf3a	hsp90aa1.2	dnajb1a	hspa4a	fkbp4
serpinh1b	pdp1	fam13b	sept15		mapk14b		dnajb1a	nsun2	hmgb3a	thap3	dnaja1
dnaja	tbccd1	cul4b	ppp3r1a		rab5aa		hmgb3a	khdrbs1a	hsp90aa1.2	cnot7	hsp90aa1.2
cry3b	si:ch211-195b13.1	cept1b	gabra1		mapk1		chd4a	hsf1	srsf5a	dnajb1a	serpinh1b
cngb3.1	tlcd4a	usp5	tmed1b		stat5.1		hsp90aa1.2	pphln1	khdrbs1a	ss18
zc2hc1a	gabrg2	mfap3l	mturn		rab30		srsf5a	cnot7	pphln1	tra2a
tcf3b	atp6v0a1b	dnajc7	elmod3				nsun2	hspa4a	cnot7	eif4a2
LOC120490127	atp6v0a1b	maco1a	atp1b2a				khdrbs1a	hnrnpa3	hspa4a	fkbp4
med16	myo1ha	asph	LOC120481455				hsf1	cirbpa	cirbpa	dnaja1
chordc1a	copz1	bace1	opa1				pphln1	ide	si:ch211-132b12.7	LOC120492105
rsrp1	ddx3xa	gabrg2	eif4ebp2				cnot7	hspa5	hspa5	suz12b
mark3b	cs	si:dkey-19e4.5	sidt2				hspa4a	med16	med16	LOC120460440
hsp70.3	dhx29	pdp1	elmod1				u2af2b	eif4a2	eif4a2	clpxa
si:ch211-114c17.1	kansl3	avpi1	nat16				u2af2b	serpinh1b	serpinh1b	hnrnpl2
LOC120486364	atad1a	si:ch211-195b13.1	kif5bb				hnrnpa3	fkbp4	fkbp4	khdrbs1a
cep162	atad1a	napaa	LOC120478900				cirbpa	hsp70.3	thap3	hmgb3a
hsf1	rab39ba	edil3b	gpr158a				ide	thap3	LOC120486364	rybpa
LOC120491998	bace1	lgals3a	vapb				ide	LOC120486364	LOC120474467	kdm6bb
hsp90aa1.2	napaa	map6a					si:ch211-132b12.7	LOC120474467	tra2a	pphln1
kcnip3a	LOC120464410	ssr1					si:ch211-132b12.7	tra2a	dnajb1b	st8sia5
myo1ha	maptb	tlcd4a					hnrnpk	cry3b	hnrnpl2	pum1
epb41l5	adss2						hspa5	sesn3	dnaja1	cirbpa
eif3c	rab30						med16	dnajb1b	ciarta	brsk1a
kdm5bb	vps4b						eif4a2	hnrnpl2	pum1	LOC120474467
celf1	tmem185						serpinh1b	LOC120488195	mapk10	celf3a
celf1	pdha1a						fkbp4	dnaja1	suz12b	cops2
LOC120469454	LOC120494102						pwp2h	pum1	klhl22
kcnd2	edil3b						hsp70.3	cirbpb	rybpa
LOC120491996	abhd14a						thap3	creb1b	brsk1a
dnajb1b	arl8a						LOC120486364	suz12b	kdm6bb
ctnnd2b	hnrnpm						LOC120474467	atf7b	LOC120460440
LOC120475663	sugp1						tra2a	rybpa	rnf38
cltcb	tmtc3						cry3b	brsk1a	jarid2b
hspa5	supt3h						sesn3	wwp2	clpxa
LOC120488195	idh3g						dnajb1b	celf1	ccdc85ca
si:dkey-190g11.3	tomm70a						hnrnpl2	kdm6bb	pdia6
tsc1a	tcf7l1b						LOC120488195	cars2	LOC120492105
tsc1a	zgc:113274						dnaja1	si:dkey-190g11.3	LOC120469491
tsc1a	syvn1						ciarta	celf3b	srsf5b
tsc1a	syvn1						pum1	slc43a2a	ss18
LOC120464051	kdsr						cirbpb	LOC120460440	abhd2a
tial1	ch25hl2						creb1b	si:ch211-114c17.1	LOC120473282
fbrsl1	nolc1						mapk10	LOC120471287
trim33	tlcd4b						suz12b	mapre3a
ogt.1	vamp2						klhl22	chordc1a
cry3a	chka						klhl22	kcnd2
spty2d1	twf1a						klhl22	clptm1
ddx17	dpp9						atf7b	snap91a
ddx17	LOC120476949						atf7b	clpxa
ubap2b	glyr1						atf7b	si:ch73-141c7.1
rxrba	grin1a						atf7b	LOC120492105
arnt2	ppp3ccb						rybpa	fbrsl1
ylpm1	tmem62						kat5b	paqr6
LOC120494102	sept15						brsk1a	nr1d1
hnrnpa1a	LOC120487118						wwp2	tial1
hnrnpa1a	sat1b						rbm17	ss18
tsc1a	pdk4						celf1	zc2hc1a
arnt2	arfip2b						celf1	aebp2
srsf11	LOC120461646						kdm6bb	gpd1l
hspa4a	fgf6a						kdm6bb	ssr1
creb1b	det1						kdm6bb	LOC120461099
thap3	tmem59l						kdm6bb	ncl
atf7b	ppp3r1a						cars2	npm1b
atf7b	LOC120486879						si:dkey-190g11.3	puf60a
atf7b	si:dkeyp-121d2.7						celf3b	gdi2
atf7b	slc7a3a						slc43a2a	pisd
dot1l	slc7a3a						LOC120460440	ctbp2a
srrt	fgd						ksr2	si:ch211-274p24.4
cnot7	calr3a						si:ch211-114c17.1	wdr31
myom1a	fxr1						rnf38	pdk2b
crmp1	slc2a1b						rnf38	qpctlb
phlpp2	slc38a3a						LOC120471287	LOC120495298
si:ch211-40k21.5	cept1b						mapre3a	myom1a
p4ha1a	gabra1						jarid2b	zgc:110224
si:ch211-114c17.1	gabra1						chordc1a	aspn
spag17	gabra1						kcnd2	scamp2
kansl3	gabra1						clptm1	kcnip3a
tafa1a	gsna						cry3b	LOC120490127
dnajb1a	gabrr2a						snap91a	dnajc7
clk4a	sugt1						clpxa	LOC120493278
clk4a	tia1l						si:ch73-141c7.1	ubxn4
hnrnpm	tmed1b						maptb	rer1
LOC120461099	LOC120464341						ccdc85ca	p4ha1a
ctbp2a	ocrl						pdia6	trim33
ctbp2a	cdk5						LOC120492105
safb	cdk14						LOC120469491
snap91a	cdk14						pphln1
zgc:136971	faim2a						irx1a
phf20a	faim2a						zgc:109986
hsf1	elovl4a						fbrsl1
rbm5	csnk1e						srsf5b
wdr31	csnk1e						paqr6
srsf6b	mturn						nr1d1
hnrnpa3	elmod3						klhl22
ss18	elmod3						tial1
tra2a	skida1						per2
mapre3a	atp1b2a						ss18
chd4a	cers1						tnikb
eif4a2	atrn						zc2hc1a
si:dkey-117m1.4	LOC120468245						aebp2
puf60a	reps2						mylipb
papola	LOC120481455						gpd1l
dbx1b	drap1						ssr1
LOC120477545	pcyt1ba						cnot1
LOC120485966	phf20l1						wdr35
fastkd3	zmp:0000000662						LOC120461099
dhx30	LOC120476100						tia1
mtdha	LOC120482978						ncl
ndnl2	golph3b						tfeb
ndnl2	kcnip1a						rcan1a
fam13b	caska						cry3b
fkbp4	opa1						npm1b
pbrm1l	pik3r2						ss18
hcn2b	pik3r2						rdh14a
fam89b	pik3r2						puf60a
hnrnph1	pik3r2						gatad2ab
hnrnph1	gabrg2						gdi2
egln1b	ogg1						arhgef9a
dnaja1	ophn1						pisd
LOC120491360	eif4ebp2						cltca
atf4b	oxsr1a						sik1
ercc5	slc16a5a						ncoa5
si:dkey-56e3.3	slc16a5a						abhd2a
si:dkey-82f1.1	gpc1b						vezf1b
cul4b	ino80b						fam219ab
pygo2	sidt2						nr4a1
g3bp1	rufy3						wu:fa19b12
cept1b	elmod1						LOC120469565
cept1b	cdh10a						ctbp2a
pex13	arntl2						ctbp2a
sfpq	nat16						si:ch211-274p24.4
hdgfl2	cunh18orf21						LOC120461027
usp5	si:ch211-207j7.2						wdr31
scyl1	si:ch211-207j7.2						kdm2ba
gpd1l	stk25a						mbtd1
ipo11	gmfb						u2af2b
aldh5a1	prkar1b						aldh4a1
aldh5a1	acsl6						dctn1a
aldh5a1	LOC120491138						LOC120472247
gdi2	kcnab2a						tmem240a
tmem65	kcnab2a						pi4k2b
mfap3l	pygmb						LOC120489800
mfap3l	fam53b						pspc1
galnt9	fam53b						rnf38
dnajc7	LOC120494493						ipo8
map2k4a	zdhhc20b						zmynd11
clptm1	gpr107						sh3kbp1
hbs1l	hgs						raf1b
maco1a	kif5bb						eefsec
LOC120487172	vps37bb						pdk2b
ddx23	serac1						mef2d
ide	homer1b						suds3
ide	sppl2						qpctlb
mtmr6	tmem9						pcloa
psmf1	LOC120475481						dysf
adipor1b	si:dkey-222b8.4						LOC120495298
prelid3a	LOC120485291						afg3l2
slc25a36b	LOC120478900						myom1a
retreg1	cacnb4b						nucks1b
zgc:65894	sacm1la						plekha8
npm1b	caln1						zgc:110224
acad9	herc3						tcirg1a
asph	preb						LOC120473282
LOC120480129	LOC120477769						dpp9
bace1	cep290						ypel3
gabrg2	st6gal1						ypel3
LOC120492105	LOC120464473						aspn
hmgb1b	frmd4bb						gnai2b
si:dkey-19e4.5	si:ch73-100l22.3						si:dkey-18a10.3
ankhb	rab11a						LOC120493745
igbp1	gpr158a						scamp2
suz12b	nufip1						ccdc85al
fbxl6	vapb						ttll5
zc2hc1a	slc25a42						tax1bp1b
cirbpb	slc25a42						nudt3a
pdp1	slc25a42						nudt3a
scamp2	rdh10a						hsp90b1
atcayb	acsl4a						tmem87b
atcayb	kif21a						rcor1
brd9	ctdsplb						cunh19orf47
enpp5	sowahd						kdm1a
enpp5	ywhaba						trim3a
hmgb1a	tmem135						trim3a
hmgb1a	rfxank						kcnip3a
LOC120460440	rfxank						zgc:153292
clpxa	traf7						tmpoa
ap2m1a	kiaa1549la						tmem237b
ap2m1a	prepl						nfe2l1b
hadh	si:dkey-275b16.2						nfe2l1b
aldoaa	nup98						gnl1
aldoaa	sfxn3						hnrnpaba
avpi1	fgfrl1b						farp2
decr1	LOC120461924						arhgef10la
rchy1	pdk3a						sash1a
hspa13	bco2a						cpox
si:ch211-195b13.1	macrod2						LOC120464340
sesn3	agfg1a						LOC120478530
wdr12	jtb						zbtb21
napaa	LOC120473919						si:dkey-197c15.6
edil3b	zgc:101540						rab3gap1
qpctlb	LOC120471891						nfe2l1b
lancl1	LOC120490812						si:ch1073-224n8.1
f3a	yjefn3						jmjd6
LOC120488133	arhgef10la						zfyve27
nsun2	chd1						her6
nob1	nomo						tcf7l2
selenbp1	syt1a						nab1b
hnrnpl2	syt1a						LOC120490047
u2af2b	syt1a						zgc:114041
cars2	asb3						ankfy1
hmgb3b	si:ch211-51e12.7						LOC120490127
aebp2	srsf6a						plxdc1
plekhm2	tmem63ba						prr5b
sh3glb2b	LOC120466827						LOC120463021
selenot2	slc19a2						dyrk4
selenot2	usp54b						kmt2ca
pisd	prelid3b						wwc3
khdrbs1a	mfn2						mettl22
kiaa1143	mfn2						mettl22
hmgn2	wif1						mettl22
si:ch211-274p24.4	clockb						grm4
slc43a2a	myt1lb						LOC120487746
rassf9	pcdh18a						abca2
hmgb3a	ttyh3b						LOC120460760
LOC120471287	dipk1b						ctage5
setb	gprc5ba						LOC120460580
paqr6	gprc5ba						LOC120493745
rer1	mbd3b						rims2a
celsr1a	LOC120470777						mbd1b
lgals3a	LOC120470777						LOC120477680
dbpb	cep162						LOC120460580
hnrnpabb	pomgnt1						dtd2
rybpa	pomgnt1						dtd2
ss18	pomgnt1						cpne5a
celf3b	nhsb						ilf3b
eif3c	LOC120471794						si:ch1073-358c10.1
kdm6bb	ubtf						dnajc7
kdm6bb	ubtf						LOC120461428
kdm6bb	ubtf						aldh18a1
kdm6bb	tomm40l						pou3f2a
zgc:110224	tomm40l						recql5
pphln1	tmem106bb						LOC120467098
foxp2	lysmd3						yju2
foxp2	map6a						si:ch211-14a17.10
map6a	cnot7						txlng
wwp2	supt5h						lratd1
creb1b	slc37a4b						lratd1
creb1b	slc25a14						ptprsb
si:ch73-141c7.1	srek1ip1						ptprsb
st8sia5	LOC120469867						ptprsb
LOC120473723	tmem214						LOC120464153
nr1d1	dis3l2						sh3rf2
LOC120481577	slc16a8						fgfr2
LOC120484552	cul5a						thap1
pum1	si:ch211-151p13.8						LOC120493278
LOC120495298	LOC120485798						slc27a1a
jarid2a	LOC120465418						si:ch73-173p19.1
plin2	pfn2						ptpn4b
cirbpa	LOC120465375						trim9
ubxn4	ylpm1						LOC120461279
pdk2b	napgb						cfap45
ssr1	dnajc5ab						cfap45
tlcd4a	rab3ab						znf410
brsk1a	pacsin1a						sh3bp5a
LOC120474467	pacsin1a						ubxn4
celf3a	st8sia3						atg4da
aspn	spryd3						fzd8a
cops2	st6galnac4						gpx4a
ncl	st6galnac4						cnn3b
col9a1a	atf4a						eif4h
ubr4	npas1						LOC120460331
	npas1						LOC120486364
	ociad1						fosab
	cpeb1b						LOC120491473
	oxct1a						ppdpfb
	homer2						gtf2f2a
	elmo1						gak
	elmo1						LOC120484099
	LOC120463372						abcg1
	rab10						ak7b
	rab10						atg4c
	klc1a						LOC120460603
	ptpn9b						btg2
	asb1						vipr2
	phc2a						si:ch211-67e16.4
	phc2a						elavl4
	kctd17						si:ch211-272n13.3
	ext2						cpsf6
	ndfip1l						eif2ak4
	ndfip1l						amy2al1
	klf7a						ankrd10a
	lzts2a						usp10
	lzts2a						LOC120484109
	lzts2a						zgc:136439
	bcl2b						snap91a
	exoc8						snap91a
	zfyve9b						LOC120472358
	wbp2						pip4p2
	zgc:154046						nadk2
	ensab						bnip1b
	sema3e						ushbp1
	slc22a21						msrb3
	LOC120479128						rer1
	ephb4b						rer1
	LOC120468243						rer1
	LOC120470743						zgc:162944
	si:dkey-253i9.4						p4ha1a
	rpl28						pcloa
	myo10						dgki
	myo10						wdr32
	tbcela						LOC120461954
	stx6						LOC120475866
	pcbp3						LOC120475866
	slc39a7						rcan3
	tcp11l1						adgrl1a
	tcp11l1						tmem181
	LOC120477552						gtf3c3
	dnajc5aa						cog7
	cluha						cog7
	cpe						cog7
	zbtb49						cog7
	lgals3a						nbeab
	cers5						lman2lb
	LOC120495493						LOC120492058
	ugcg						si:ch211-119c20.2
	nmt1a						ptpn11b
	tmem60						epha4l
	tmem60						hars
	hps3						tprg1l
	LOC120491869						camsap1a
	LOC120469974						LOC120475479
	etv1						ppp1r13bb
	si:dkey-172j4.3						chd2
	si:ch211-207i20.3						LOC120489827
	scamp5a						dst
	rorb						LOC120482374
	tspan7b						LOC120482374
	cpped1						LOC120482374
	man2a2						bcl11ba
	man2a2						phc2b
	znf385c						wwc3
	rap1gds1						dtx2
	sytl2b						dusp8a
	camk2d2						kctd17
	ppp2r1bb						psen1
	stam2						psen1
	tax1bp1b						tgif1
	znf410						camsap1b
	znf410						LOC120491905
	grpel2						LOC120491905
	syk						si:ch73-103b11.2
	syk						ubap2a
	ip6k2b						igf2bp2a
	LOC120471605						usp10
	LOC120471605						naxd
	LOC120471605						hsf2
	si:dkey-17o15.2						dnajc3a
	sirt1						brd3a
	rbm18						mfsd14bb
	ube2b						zmat1
	LOC120475969						tfr1a
	LOC120475969						tfr1a
	mapk9						tfr1a
	mapk9						tfr1a
	ahcyl1						baiap2b
	pcloa						brsk1a
	sult4a1						dachd
	asph						rab40c
	pnp6						rab40c
	tbc1d14						rab40c
	LOC120471127						pou3f3a
	arhgap4b						ptprfa
	scn4ba						picalmb
	scn4ba						scube1
	zdhhc17						tubb2
	zfand5a						myom2a
	LOC120473983						rapgef6
	LOC120480656						LOC120488409
	irf5						stambpl1
	sypa						oaz2a
	LOC120486885						LOC120493745
	atp1a1b						fer
	cd81a						fer
	stmn2a						fer
	manbal						nbeab
	tradd						eif4ba
	cerk						kcnc1a
	cstf2						si:ch73-52f15.5
	LOC120482622						calcoco2
	epn1b						calcoco2
	ncam1a						cdk5rap2
	hlx1						stxbp5b
	gnal2						LOC120492185
	snrnp48						LOC120489360
	hk1						med11
	cfap251						sema4d
	asic2						sema4d
	LOC120493825						sema4d
	dmtf1						sema4d
	tjp1b						csnk2a2b
	cyhr1						LOC120459900
	tnr						hnrnph3
	tnc						chd2
	LOC120465020						chd2
	zfyve28						LOC120483669
	ppp6r3						LOC120462809
	rab41						LOC120484633
	LOC120489872						btg1
	tm9sf2						ewsr1a
	zmym4.1						flncb
	LOC120463265						sufu
	ube2d4						atad2b
	LOC120460625						LOC120479605
	LOC120460625						slc22a18
	mark3b						slc22a18
	znf423						col15a1b
	pde3a						LOC120463385
	tnika						ubash3bb
	LOC120484468						LOC120475416
	myh9b						eml1
	arhgef15b						usf2
	arhgef15b						znf644a
	LOC120474444						rcbtb1
	srsf1b						ptprt
	pcbp4						zfx
	sobpa						carmil2
	xpa						sox2
	xpa						tpm1
	xpa						zfx
	bcl2l1						castor1
	bcl2l1						LOC120461878
	LOC120459909						sobpb
	gnb5b						si:ch211-232b12.5
	si:dkey-181m9.8						adcy1b
	mapk8a						LOC120482521
	cbx8b						LOC120469104
	trir						akip1
	gcfc2						LOC120463019
	mapk1						cbx4
	sept15						stx3a
	gad1b						LOC120469962
	rab14						pacsin2
	LOC120482043						epb41l3a
	nrsn1l						plcb2
	LOC120464278						plcb2
	snx7						tnnt1
	eloca						chst10
	slc6a1a						l3mbtl1b
	LOC120482519						l3mbtl1b
	LOC120487762						LOC120491142
	LOC120490618						ipo8
	nup35						zmp:0000000529
	rft1						si:dkey-200l5.4
	zdhhc7						trpc7a
	prtfdc1b						fbxw7
	mlh1						hhipl1
	mlh1						pla2g7
	irx1b						utp25
	snx9a						rad23aa
	tefb						emc10
	mgat4a						LOC120481472
	kctd3						adrm1
	tlcd3bb						mief2
	map4l						mief2
	med31						cunh6orf47
	tom1l2						LOC120464199
	LOC120484848						syt7b
	nmnat2						zgc:153292
	LOC120484140						epn1a
	lclat1						grk1a
	lclat1						LOC120490055
	LOC120492315						vti1a
	kif13bb						sh3tc2
	kif13bb						acbd3
	LOC120470815						ptprua
	clvs2						hs3st4
	sharpin						lsp1a
	marcksl1a						rprd1b
	LOC120477819						iqce
	tatdn3						LOC120463460
	ap3m2						spag9b
	ap3m2						ercc3
	mov10b.2						dip2cb
	prdm2a						LOC120483128
	LOC120465287						LOC120483128
	LOC120465287						twnk
	gorasp1a						tmem198a
	marchf7						tent4b
	cluha						mkks
	ssr1						mkks
	ccdc130						aff4
	ccdc130						viml
	ccdc130						ogfrl1
	extl3						sgsh
	LOC120488420						arhgap44a
	mctp1a						zgc:91976
	pmpca						aldh18a1
	cstf1						LOC120476978
	cntn1b						tbc1d8b
	LOC120481685						zmp:0000001200
	xrra1						LOC120477266
	med6						scn1ba
	usp12b						ppp1r9ala
	abhd11						LOC120495198
	lonrf1						csf1rb
	trim9						stk38a
	ficd						trpt1
	ficd						clasp1a
	unc119.1						thumpd1
	adra2c						LOC120477427
	LOC120494307						e2f6
	LOC120463182						her15.1
	LOC120489352						morc3a
	LOC120489352						LOC120471986
	si:ch211-198a12.6						LOC120463642
	si:ch211-198a12.6						actn1
	si:ch211-198a12.6						tpm3
	LOC120477726						LOC120492739
	akap11						LOC120492736
	rrbp1a						entpd6
	gigyf1a						usf1
	cfap36						ppip5k1b
	gripap1						stxbp5b
	gra						micu3b
	tmed8						cc2d1b
	tmed8						LOC120480580
	LOC120479072						clip1a
	slc30a7						ide
	myo16						pms1
	kcnj9						pms1
	kcnj9						pms1
	kcnj9						ubr2
	vti1b						ankar
	spata6l						ttn.2
	LOC120475117						kdm6ba
	ppp1r9bb						kdm6ba
	syt11b						ptp4a2b
	atp2b3b						hmg20a
	LOC120489644						malrd1
	si:ch211-161h7.4						LOC120478364
	LOC120467910						anp32e
	zgc:123258						hgsnat
	LOC120474649						stxbp5b
	tm9sf4						tubd1
	rb1						tubd1
	lamc3						tubd1
	si:ch211-250g4.3						LOC120463093
	prrc2b						LOC120488122
	LOC120484748						wfdc1
	acvr1bb						calr3b
	phkb						si:dkey-22i16.9
	si:ch211-221n20.8						si:dkey-22i16.9
	LOC120488402						timm23b
	LOC120490046						pigr
	ablim1a						akr7a3
	slc9a7						phf23b
	LOC120472247						pacsin3
	LOC120463461						LOC120482774
	depdc7a						disp2
	depdc7a						sdk2a
	ank2b						suco
	dbnlb						tcf12
	morn5						nf2a
	letm1						nf2a
	acvr1ba						nf2a
	sacm1lb						nf2a
	mcm7						nf2a
	kcnc3a						LOC120463041
	slc52a2						LOC120478388
	vldlr						LOC120485811
	myo1ca						tmub2
	LOC120459868						tmub2
	LOC120482030						phf21aa
	pip5k1ca						ilk
	cubn						ilk
	fam168a						ilk
	zdhhc18a						LOC120492801
	LOC120460991						LOC120492801
	mak						LOC120476204
	tmem218						LOC120492387
	creld2						itgb8
	LOC120492803						LOC120463461
	LOC120462471						thsd7bb
	LOC120462471						LOC120479433
	polr2l						vstm4a
	polr2l						si:ch73-130a3.4
	LOC120479150						adpgk2
	ankrd10b						zeb1b
	tmf1						cdc25d
	rrnad1						btbd6a
	maptb						btbd6a
	nuak1a						clec16a
	limk1a						eif4g3b
	LOC120464170						pdia7
	LOC120492906						chdh
	si:ch211-14k19.8						trim33
	ntm						LOC120485447
	ntm						zfyve19
	LOC120471353						LOC120473776
	krtcap2						LOC120484233
	si:ch211-40k21.5						qrich1
	arhgap12b						oplah
	kif1ab						oplah
	si:ch211-51a6.2						kdelr3
	ikzf1						kdelr3
	dbx1a						kdelr3
	camk1a						kdelr3
	camk1a						prkab1a
	rcc1l						prkab1a
	kif1aa						grb2b
	ebf3a						alas2
	bcar3						LOC120472247
	adkb						LOC120486555
	sgip1a						LOC120464153
	tagln3a						zmym4.1
	bcl6ab						LOC120479463
	LOC120484613						LOC120461958
	znf365						stimate
	sh3kbp1						LOC120486212
	mffa						LOC120486212
	trim44						LOC120491411
	tomm34						vps37d
	tomm34						acbd4
	srsf2a						tpp2
	srsf2a						fsd1l
	srsf2a						LOC120480778
	srsf2a						wu:fj29h11
	srsf2a						dlg1a
	si:cabz01101003.1						LOC120474578
	si:cabz01101003.1						ptprdb
	LOC120467775						phf21aa
	LOC120482395						lmo3
	LOC120482395						si:ch211-153l6.6
	sv2a						msto1
	pnrc1						spag9b
	ociad1						prph
	LOC120461446						LOC120463355
	tm9sf3						LOC120465364
	tmem131l						adck1
	LOC120479286						ccdc88aa
	znf143b						akap12b
	rab11fip1a						frmpd4
	rab5aa						LOC120478317
	rab5aa						LOC120492106
	pcnt						tubgcp3
	rnf220a						zfr
	kif1aa						sh3gl1b
	cacnb3b						zgc:110239
	LOC120463168						shkbp1
	atp2b3b						ptprdb
	LOC120483357						map3k21
	il17rd						ift80
	hax1						jmjd7
	prkg1l						si:ch1073-456m8.1
	wnt7aa						LOC120468602
	recql						si:dkey-164f24.2
	si:zfos-80g12.1						LOC120471716
	LOC120464681
	LOC120492130
	si:ch211-195b21.5
	ccdc149b
	LOC120464358
	rnf216
	nacad
	sgcb
	magi3a
	magi3a
	efr3ba
	zmp:0000000936
	zmp:0000000936
	ift122
	dr1
	dr1
	cyth2
	LOC120484712
	kank1a
	kank1a
	kank1a
	rapgef5a
	gng2
	gng2
	gng2
	gng2
	kmt2cb
	zgc:110339
	alg8
	LOC120469454
	jupa
	camlg
	LOC120464323
	eps15l1b
	LOC120490741
	bcl9
	LOC120467743
	si:dkey-181m9.8
	ctnnd1
	ctnnd1
	cct8
	LOC120485878
	si:ch211-180a12.2
	stim1a
	ccni2
	nbeaa
	LOC120476096
	lnpk
	stxbp1a
	LOC120468578
	LOC120468578
	pcmtl
	adamtsl3
	dok1b
	dapk3
	LOC120490808
	vti1a
	vipas39
	LOC120472205
	slc22a17
	LOC120460535
	brox
	lifra
	lifra
	si:ch211-39i22.1
	nagpa
	fbxw4
	camk2b1
	LOC120478433
	sez6b
	gsk3bb
	gsk3bb
	syngr1a
	fgfbp3
	ankrd39
	LOC120480352
	nrp1a
	grin2aa
	brsk2a
	nos1apb
	afmid
	afmid
	LOC120476265
	rab33a
	gad1a
	snx22
	LOC120477709
	pigu
	slc6a8
	LOC120481918
	si:dkey-28b4.8
	sel1l
	tln2b
	syt3
	LOC120473292
	pcsk7
	gpsm2l
	dlg1a
	kif1ab
	ppp4r1
	ldlrad4a
	rtbdn
	eno3
	ftr84
	LOC120487732
	larp4b
	bicc2
	stxbp5l
	mettl3
	cacna1g
	LOC120472012
	oxnad1
	adrb2a
	mier2
	stxbp1a
	alg9
	zgc:109889
	kcnj11l
	negr1
	dhrs13a.1
	scn2b
	LOC120494728
	mc5ra
	zeb2b
	wbp1
	pkma
	ino80e
	ino80e
	reep2
	plpp2b
	zcchc4
	praf2
	LOC120461993
	tnikb
	usp5
	LOC120476150
	LOC120477408
	LOC120484355
	actn4
	LOC120467090
	nfil3-3
	slc12a5b
	LOC120495014
	LOC120491197
	gtpbp2b
	LOC120489630
	gbf1
	gipr
	csmd1a
	LOC120483554
	cbx1b
	fmnl2a
	mapk8b
	nell2b
	LOC120473929
	vps26c
	spartb
	LOC120491217
	dnm1a
	cunh17orf75
	LOC120463696
	ppifb
	LOC120481561
	LOC120475250
	LOC120478247
	LOC120468693
	nol10
	hax1
	sh3gl3a
	tatdn1
	slc25a37
	doc2d
	ppp1r13bb
	LOC120487922
	csnk1g2b
	nbeab
	si:dkey-191g9.5
	pcdh8
	bcat1
	ikzf2
	trmt61b
	LOC120487800
	ggt5b
	LOC120494688
	trpm3
	gsr
	zgc:110158
	lrrc17
	acox3
	LOC120461542
	pkn2a
	LOC120473291
	LOC120482774
	zfr
	akt3a
	clgn
	LOC120477501
	mindy1
	mark4b
	LOC120481445
	gpr151
	rhbdf1a
	rhbdf1a
	mgst1.2
	mgst1.2
	map3k3
	zgc:92912
	zgc:92912
	ntan1
	kcnj10a
	LOC120474669
	dusp11
	acer2
	si:ch73-233f7.1
	fam13b
	fubp3
	ada
	LOC120473672
	LOC120477286
	LOC120491197
	slain2
	ttll10
	dusp28
	ehmt2
	si:dkey-21c1.1
	krt18b
	sox19a
	cdh23
	epha3
	slc25a28
	ubac2
	ccdc66
	nlgn2a
	nlgn2a
	nlgn2a
	nlgn2a
	ap2a1
	slc7a1b
	slc7a1b
	slc7a1b
	mettl3
	tango6
	enkur
	LOC120465234
	LOC120475863
	zfhx3
	r3hdm4
	bcan
	hpca
	hpca
	hpca
	ece2b
	spata5l1
	ppp1r9alb
	diras1b
	diras1b
	LOC120479767
	faxcb
	LOC120467967
	si:ch211-269k10.4
	tada2b
	dvl1a
	cdk5r1b
	cav1
	ak2
	gnb4a
	gnb4a
	caska
	kiaa0753
	edil3a
	prune2
	prune2
	prune2
	prune2
	mta3
	stum
	tm7sf3
	LOC120493176
	tpd52
	ptprdb
	slc22a15
	gpd1c
	cdkn1a
	nek4
	LOC120495186
	slc30a6
	map7d2b
	ppp6r3
	LOC120468121
	ablim1b
	clk4b
	clk4b
	cenatac
	nhsl1b
	LOC120473295
	ccng2
	capzb
	ddhd2
	tmem134
	tmem187
	has3
	prickle2b
	ramp1
	baxb
	si:dkey-246e1.3
	LOC120459931
	LOC120459931
	si:dkey-93h22.8
	LOC120480788
	LOC120467775
	socs5b
	LOC120486428
	man1a1
	slc26a10
	dnm2a
	ssh1a
	sulf2b
	LOC120485927
	LOC120485927
	tle3b
	efl1
	dstyk
	mars1
	si:dkeyp-9d4.3
	larp4b
	med12
	kcna1a
	chmp2a
	sox6
	LOC120493194
	utp20
	ugt5f1
	LOC120474745
	LOC120474745
	LOC120468562
	LOC120494654
	LOC120473282
	diaph2
	dysf
	larp4ab
	znf281a
	klhl13
	chrm4a
	sh3gl1b
	nckap5l
	nckap5l
	slc4a8
	rundc3b
	map7d2b
	LOC120469666
	gdap1l1
	cadpsa
	pde1ca
	tcp11l2
	pomt1
	pomt1
	robo4
	stat5b
	il13ra1
	mb21d2
	cunh8orf34
	cntrob
	htatip2
	LOC120468183
	mtmr7b
	LOC120495156
	ND1
	med25
	fhod1
	LOC120473285
	inpp4b
	inpp4b
	inpp4b
	amigo1
	zdhhc9
	LOC120481299
	LOC120481728
	pik3ip1
	ddx51
	si:dkey-264d12.5
	ptpreb
	ptpreb
	polr1a
	sfxn5b
	mtres1
	pfn2
	LOC120462114
	camk2g2
	map9
	agpat5
	supt20
	arhgap33
	cunh6orf120
	LOC120463725
	parp12a
	nbeaa
	LOC120484846
	gadd45ga
	lix1
	xpo1a
	lrp8
	clasp2
	gria4a
	LOC120479123
	LOC120479123
	LOC120486125
	capn12
	sik2b
	adcyap1r1b
	slc25a23a
	pdia3
	masp2
	rars2
	ppp1r9a
	nthl1
	LOC120461524
	LOC120476759
	tom1
	zgc:194398
	LOC120473248
	capn9
	eif2b1
	ldb2b
	nadk2
	ube2e1
	ass1
	LOC120489275
	LOC120489274
	si:ch211-13c6.2
	fxyd5
	LOC120466276
	LOC120466309
	pkia
	rxfp2l
	scube1
	LOC120473870
	tpcn2
	lrch1
	epas1b
	mterf4
	mmrn2b
	stx1b
	tspan4a
	polr1c
	LOC120471051
	LOC120471051
	wrap73
	nudt9
	LOC120491639
	kcnma1a
	dgkh
	nt5c2l1
	LOC120470709
	LOC120491190
	LOC120491197
	LOC120479269
	LOC120479269
	qtrt1
	tmem67
	tns1a
	slc44a1a
	prom1b
	trpm3
	maea
	znf385a
	nhsl1a
	chchd6b
	trit1
	trib1
	epha4b
	LOC120470586
	LOC120470586
	neto2b
	sypl2b
	zgc:153615
	zgc:77849
	LOC120481097
	LOC120480846
	oxsr1b
	LOC120470674
	apba2a
	LOC120483571
	LOC120468914
	LOC120490734
	ganabb
	raph1a
	rab6ba
	ncstn
	si:dkey-21p1.3
	pcdh19
	ppox
	si:dkeyp-92c9.2
	zdhhc5b
	LOC120482079
	LOC120471614
	hip1rb
	rbm39b
	LOC120475509
	celf2
	pcyt1ba
	mapk14b
	prkx
	LOC120482043
	LOC120489284
	pank1a
	btbd3b
	prss12
	inpp4aa
	dclk1a
	rabepk
	LOC120475962
	sema4f
	rfx1b
	tmub1
	dcaf6
	mbnl3
	fut10
	nt5c2a
	ctss1
	ctss1
	tmem230b
	rnd3a
	fanci
	LOC120470388
	prkcba
	LOC120460914
	rpl3
	si:ch211-166a6.5
	rc3h1b
	si:dkey-81h8.1
	stx18
	rcan3
	zgc:194221
	kif13a
	aasdh
	ralgapb
	aco1
	setdb2
	LOC120493020
	LOC120480421
	snx2
	rbm19
	parn
	ATP6
	cpeb2
	gramd4a
	wbp4
	LOC120476794
	rab43
	capzb
	LOC120471566
	zfyve16
	zfyve16
	zfyve16
	apooa
	bcar1
	slc6a22.2
	nrxn1a
	pbx3b
	exd2
	nrbp1
	rgmb
	syt19
	LOC120481692
	adprm
	tox4b
	LOC120485049
	LOC120465552
	ephx2
	LOC120461835
	esyt2b
	abi2a
	zgc:63587
	LOC120462402
	mfge8a
	sgsm2
	LOC120475452
	pank1b
	gng7
	si:dkey-6n6.1
	zgc:114130
	nudt4a
	lmtk2
	mier3a

## Sheet: Female Gene Lists
DEGs	MEred	MEred and DEGs	MEred Hub Genes	MEred Hub Genes and DEGs	MEred MCODE Cluster	MEred MCODE Cluster and Hub Gene	MEturquoise	MEturquoise and DEGs	MEturquoise Hub Genes	MEturquoise Hub Genes and DEGs	MEturquoise MCODE Cluster	MEturquoise MCODE Cluster and Hub Gene
tnnt3b	eif3c	kat5b	eif3c	kat5b	hspa5	hspa5	eif3c	tcf7l2	mkrn1	mkrn1	ccdc124	nob1
LOC120486462	cops2	znf384a	cops2	dnaja	tprb	dnajb1a	hnrnpa3	LOC120486347	nob1	nob1	rps5	cct2
lrp2a	safb	serpinh1b	safb	eif3c	FDFT1	hspa4a	ss18	kat5b	soul3	soul3	dqx1			*Bolded genes are also DEGs
pde3a	kdm6bb	dnaja	kdm6bb	zc2hc1a	sigmar1	hsp90aa1.2	cry3a	rsrp1	myef2		rps10
LOC120468673	kdm6bb	eif3c	u2af2b	hsp90aa1.2	dnajb1a	hsf1	rsrp1	eif3c	si:ch211-51e12.7		gart
myom1b	kdm6bb	zc2hc1a	hmgb3a	hsp70.3	hspa4a	hsp70.3	hnrnph1	zc2hc1a	usp49		eif5a2
atp2a1l	kdm6bb	hsp90aa1.2	hsp90aa1.2	snx7	tm7sf2		hnrnph1	cry3b	ttll5		cct2
tcf7l2	u2af2b	clasp2	abhd2a	atxn7l3b	nup188		srsf6b	clasp2	b3galt1b		rrp12
LOC120469475	hmgb3a	ctnnd2b	eif4a2	lsm14ab	nsdhl		srsf11	LOC120486364	LOC120488267		eif3f
LOC120487735	hsp90aa1.2	hsp70.3	per1b	pphln1	cdc37		zc2hc1a	maptb	srsf6a		taf15
LOC120471986	abhd2a	epb41l5	hnrnpabb	tpst1	hsp90aa1.2		rbm4.1	kdm5bb	si:dkeyp-121d2.7		rpl23a
LOC120461989	eif4a2	snx7	ppdpfb	hspa5	hmgcra		tcf3b	epb41l5	cep295		nog2
ckmt2a	per1b	LOC120488195	cry2	kctd9b	nup43		tra2a	srsf11	ehbp1l1b		polr1b
LOC120469742	hnrnpabb	atxn7l3b	srsf5a	p4ha1a	Hsd17b7		kdm5bb	ank2b	zmiz2		srp54
pgam2	ppdpfb	tcf12	poldip2	hspa4a	dhcr7		mkrn1	cry3a	cunh11orf68		eif3k
mylpfa	cry2	fbrsl1	jarid2a	tsc1a	hmgcs1		nob1	si:dkey-151g10.3	dio3b		trub2
atp2a1	srsf5a	lsm14ab	si:ch211-132b12.7	eif4a2	lss		LOC120486364	prkag3a	jpt1b		hnrnph3
LOC120482499	poldip2	pphln1	pphln1	dnajb1a	idi1		epb41l5	ss18	chtopa		rpl7l1
LOC120461473	jarid2a	ank2b	jarid2b	hikeshi	sqlea		plxnb1b	soul3	cpsf6		rbm34
myod1	u2af2b	tpst1	LOC120484552	srrt	hsp90b1		pcloa	hnrnpa3	celf3a		gfm1
LOC120487273	si:ch211-132b12.7	hspa5	atxn7l3b	hsf1	ahsa1l		bbs4	srsf6b	unc13a		nob1
LOC120487370	si:ch211-132b12.7	kctd9b	cipca	hnrnpk	hsf1		kat5b	rab3gap1	oxsm		pabpn1
tnnt3a	pphln1	ss18	amd1	kctd7	C1H11orf73		sec63	zgc:85858	LOC120492271		riok1
slc25a4	jarid2b	map4l	fkbp4	pspc1	hsp70.3		LOC120460548	rbbp5	cgnl1		ftsj1
LOC120460300	LOC120484552	ilf3b	zc2hc1a	hspa13	hsf2		LOC120460548	rnf11a	cct2		pdcd11
txlnba	atxn7l3b	p4ha1a	tpst1	cers1			gtf2a1	npdc1a	LOC120484105		eif2s2
tnni2a.1	atxn7l3b	hspa4a	hikeshi	rcor1			cry3b	asxl1	pym1		wdr43
srl	cipca	tsc1a	recql5	poldip2			opa1	ptpn12	mansc1		cebpz
LOC120476191	amd1	ddx17	kat5b	hnrnpabb			lonp1	mkrn1	trim46b		rbm28
mylz3	fkbp4	eif4a2	rfx4	rybpa			soul3	bap1	tafa5l		utp6
guca1a	zc2hc1a	dnajb1a	brwd1	hmgb3a			myef2	bbs4	marcksl1b		mrpl15
ckmb	tpst1	serp2	dnaja	celf1			mid1ip1l	sf1	tgif1		mrpl16
cav3	hikeshi	hikeshi	hspa4a	rfx4			LOC120462586	yy1b	dock5		ebna1bp2
desma	recql5	mcoln1a	rybpa	cirbpa			smim8	opa1	alkbh5		rbmx
tnnc2	lancl1	srrt	klhl22	LOC120474467			cd81a	cd81a	plekho2		dohh
LOC120478602	kat5b	LOC120473723	hspa5	kdm6bb			tcf3b	pbxip1b	vapa
LOC120469713	rfx4	cspg5a	LOC120481577	jarid2b			arntl1a	nob1	rnf170
txnipb	brwd1	sh3bp5a	cers1	LOC120484552			gra	sec63	mpp6b
LOC120488698	dnaja	b3galnt2	rcor1	jarid2a			LOC120491905	f3a	irf2bp2a
LOC120488698	hspa4a	LOC120467993	pspc1	rsrc2			LOC120491905	sgpl1	maff
trim63a	serp2	rab3gap1	dnajb1a	cops2			si:ch211-51h9.7	ugt5e1	fbxl15
tpma	rybpa	snap91a	naa40	klhl22			si:ch211-51e12.7	cldn19	rasd4
LOC120491476	mapre3a	hsf1	hnrnpk	LOC120482050			si:ch211-51e12.7	c2cd5	pak5
ttn.1	klhl22	ypel2b	pwp2h	LOC120481577			ecpas	znf346	fam53c
LOC120469744	klhl22	camk2n2	cirbpa				zgc:101540	celf1	LOC120467963
rnf207b	klhl22	pbrm1l	p4ha1a				med20	elavl1b	ncoa5
zgc:113276	hspa5	hnrnpk	LOC120490029				si:ch1073-44g3.1	gra	akirin2
gapdh	LOC120481577	rbbp5	itpr2				slc2a1b	cirbpa	gxylt1a
actc1b	cers1	bnip3	lsm14ab				cited4b	LOC120474467	zgc:158254
atp2a1l	rcor1	kctd7	snx7				sfpq	arhgef4	dock10
ckma	pphln1	nfil3	hspa13				maptb	enosf1	LOC120464298
pfkmb	hmgb3b	ier5l	hsf1				prkag3a	LOC120481577	agfg1a
tnni2b.2	LOC120464153	med14	dcakd				prkag3a	itpr1b	ghitm
pah	pspc1	ccdc85al	celf3a				usp49
LOC120481127	hnrnpabb	chd4a	LOC120474467				sf1
acta1b	kiaa1143	pspc1	arntl1b				ptpn12
adipoqb	rbm17	mapre3a	slc1a2b				otud5a
LOC120491996	dnajb1a	g3bp2b	rsrc2				f3a
vtg3	naa40	yy1a	mink1				rbpja
LOC120486347	hnrnpk	gdi2	tmpoa				sidt2
lmod2b	slc16a3	atp6v0b	pdia6				si:ch73-212j7.1
myoz3a	pwp2h	tmem50a	hsp70.3				ttll5
kat5b	cirbpa	nsfl1c	srrt				yy1b
LOC120490072	p4ha1a	LOC120490047	tra2a				si:ch73-212j7.1
LOC120490775	LOC120490029	dgcr8	st8sia5				b3galt1b
znf384a	LOC120490029	ttc13	tsc1a				b3galt1b
slc39a5	LOC120490029	mapre1b	atf4a				b3galt1b
si:dkey-46i9.6	itpr2	med24	kctd7				b3galt1b
serpinh1b	lsm14ab	hspa13	kdm1a				nfyal
dnaja	snx7	zmpste24	usp54b				LOC120488267
LOC120490127	hspa13	cers1	serf2				LOC120488267
rsrp1	setb	atp1b4	cunh19orf44				tra2b
eif3c	hsf1	rcor1	LOC120482050				dcun1d4
zc2hc1a	sh3bp5a	lancl1	zdhhc24				gins2
cry3b	dcakd	swt1	rabgap1l				ugt5e1
hsp90aa1.2	dcakd	prelid3a	celf1				LOC120461170
clasp2	dcakd	plekha8	herpud1				gnai2b
ctnnd2b	celf3a	chka	fam189b				bap1
LOC120486364	LOC120474467	atp1a1b	kctd9b				srsf6a
maptb	arntl1b	odf2a	mbtd1				zfand5b
hsp70.3	slc1a2b	hmgb3b	cdk2ap2				zfand5b
kdm5bb	ddx17	higd1a	wdr35				peli3
epb41l5	ddx17	kiaa1143	ahsa1b				LOC120471575
snx7	rsrc2	smo	wwp2				sgpl1
LOC120488195	smim5	glula	rnf38				tgm1l1
atxn7l3b	ppig	znf512	slc9a6a				tefa
atxn7l3b	mink1	poldip2					LOC120488133
tcf12	bnip3	LOC120464153					trir
tcf12	tmpoa	hnrnpabb					eif1
fbrsl1	anapc16	msi1b					trim33
srsf11	pdia6	setb					gabrg2
lsm14ab	ing4	c2cd5					mbd3b
pphln1	fastkd3	rybpa					si:dkeyp-121d2.7
ank2b	hsp70.3	znf346					cldn19
LOC120481877	srrt	hmgb3a					cep295
tpst1	ppp1r37	tia1					prkag2a
hspa5	zgc:113210	slc16a3					si:dkey-151g10.3
kctd9b	zgc:113210	celf1					thap11
cry3a	brsk1a	arhgef10la					dtwd2
si:dkey-151g10.3	tra2a	elavl1b					rnf220a
prkag3a	odf2a	rfx4					tsnax
prkag3a	cnot7	socs1b					rnf11a
ss18	st8sia5	cirbpa					zgc:85858
map4l	tsc1a	LOC120474467					rbmx
ilf3b	atf4a	il2rgb					adcy7
p4ha1a	kctd7	kdm6bb					adcy7
hspa4a	gdi2	jarid2b					adcy7
tsc1a	ctnnd2b	arhgef4					si:ch211-203d1.3
ddx17	kdm1a	LOC120484552					si:ch211-203d1.3
ddx17	usp54b	jarid2a					rxrba
si:ch211-199f5.1	serf2	rsrc2					cry3b
eif4a2	si:ch211-114c17.1	cops2					cdkn1bb
dnajb1a	cunh19orf44	znf740a					clasp2
serp2	ing4	klhl22					hgs
hikeshi	LOC120482050	rspo2					wu:fb55g09
soul3	LOC120482050	LOC120482050					LOC120467931
mcoln1a	ciarta	LOC120473156					LOC120467931
srrt	zdhhc24	LOC120481577					si:ch1073-357b18.4
hnrnpa3	zdhhc24	itpr1b					pdia7
srsf6b	suz12b						ints6l
LOC120473723	hsf1						LOC120486221
LOC120485212	rabgap1l						LOC120470672
cspg5a	macrod2						LOC120470672
sh3bp5a	serpinh1b						gas1b
serpinh1a	plekha8						sirt1
b3galnt2	tia1						ehbp1l1b
LOC120467993	chd4a						puf60a
rab3gap1	LOC120482693						rab3gap1
snap91a	rsrc2						pfn2l
hsf1	cnot1						npdc1a
ypel2b	phf6						rnf150b
camk2n2	phf6						zmiz2
pbrm1l	phf6						znf410
zgc:85858	LOC120468569						znf410
LOC120473078	ier5l						fam155b
hnrnpk	camk2n2						cunh19orf47
rbbp5	celf1						tns1a
ybx1	LOC120470988						gmeb2
bnip3	ypel3						LOC120480139
kctd7	ypel3						rbm5
egln1b	nrf1						pbxip1b
pknox2	herpud1						LOC120460029
pknox2	fam189b						fbxo7
nfil3	josd2						puf60a
rnf11a	kctd9b						fcho2
ier5l	tmem237b						zgc:65895
npdc1a	mbtd1						s100b
asxl1	ptch2						s100b
med14	znf740a						eef1db
ptpn12	mcoln1a						eef1db
ccdc85al	aebp2						LOC120483700
chd4a	u2af2b						cunh11orf68
mkrn1	LOC120495298						si:ch211-234h8.7
bap1	cdk2ap2						si:ch211-234h8.7
bbs4	znf384a						ciao1
snn	nfil3						zgc:153867
pspc1	LOC120467993						dio3b
olig1	atp1a1b						dnajb6a
sf1	c2cd5						dnajb6a
mapre3a	LOC120489366						gfod2
yy1b	LOC120489366						gfod2
hrasa	ncoa6						cab39l1
rtcb	vapb						jpt1b
g3bp2b	rgp1						LOC120473883
yy1a	tbccd1						vac14
pcnx4	wdr35						LOC120491998
lgals3a	snap91a						syne3
gdi2	snap91a						ncbp2
tmem135	dnajc8						chtopa
atp6v0b	LOC120466694						naif1
tmem50a	LOC120466694						chd2
asph	dbn1						wasla
ide	dgcr8						cpsf6
ide	dgcr8						celf3a
nsfl1c	mapk8b						LOC120485633
LOC120490047	chd4a						zbtb8a
dgcr8	si:dkey-19e4.5						cunh8orf82
dgcr8	ahsa1b						tmem240a
ttc13	sigmar1						LOC120486347
opa1	slc6a13						itgb1bp1
adam9	zmpste24						LOC120472049
mapre1b	oga						ankrd37
cd81a	usp10						LOC120474467
med24	yy1a						drap1
pbxip1b	zgc:162297						g3bp1
hspa13	si:ch211-162e15.3						LOC120493437
zmpste24	ctnnd2b						crbn
dpp3	wwp2						ttc26
cers1	zgc:113423						celf3b
ifrd1	tjp1b						LOC120483107
prpf31	hmgcs1						srsf1a
scdb	puf60a						srsf1a
atp1b4	apba2b						pes
rcor1	capzb						pcm1
nfe2l3	smo						LOC120492275
ubtfl	med24						LOC120492275
lancl1	prelid3a						ubap2l
swt1	rab21						unc13a
nob1	tmem50a						oat
prelid3a	nsfl1c						cunh1orf198
sec63	psme4b						svila
plekha8	ccar1						slc22a2
chka	msi1b						uvrag
ampd3a	atp6v0b						ptbp1a
ampd3a	fgfr2						arntl1b
ampd3a	higd1a						slc7a3a
ampd3a	stxbp5a						slc7a3a
f3a	suds3						mink1
atp1a1b	rnf10						araf
slc19a1	LOC120490047						LOC120493078
slc19a1	swt1						LOC120473310
slc19a1	il2rgb						lmo7b
sgpl1	gli1						med25
nsun2	thap1						tmem214
odf2a	cspg5a						oxsm
hmgb3b	LOC120492126						oxsm
higd1a	pbrm1l						LOC120481847
zc2hc1a	arhgef10la						LOC120471800
kiaa1143	bco2a						prr18
hnrnpdl	spata5l1						sdf4
hnrnpdl	setd7						cnot3a
hnrnpdl	LOC120470405						sh3bgrl3
smo	LOC120470405						LOC120481685
glula	LOC120470405						ccdc30
znf512	LOC120470405						LOC120475923
znf512	LOC120470405						cdk11b
znf512	b3galnt2						LOC120492271
LOC120462693	znf512						fgd5a
poldip2	znf512						gars1
ugt5e1	znf512						necap2
cldn19	cunh19orf47						supt16h
rtel1	nhsl2						LOC120487927
LOC120464153	ccdc85al						ybey
hnrnpabb	ldhd						map3k7
usf2	carmil3						tnnt2d
plekhm2	g3bp2b						LOC120486885
msi1b	mak						asb2b
lsm14ab	dop1b						kcnc2
setb	nt5c1bb						si:ch211-284e13.6
c2cd5	hnrnpa1a						si:ch211-284e13.6
rybpa	hnrnpa1a						LOC120460570
znf346	ilf3b						pax2a
hmgb3a	znf148						odr4
tia1	mapre1b						cacna1ba
dnajc5ab	kif5bb						LOC120478449
dnajc5ab	rnf38						LOC120478449
slc16a3	stimate						LOC120478449
eif3c	pfkfb4a						LOC120478449
celf1	c1qtnf1						nipblb
amph	sh3rf2						LOC120461981
arhgef10la	ewsr1b						znf346
pphln1	rbm33a						ch25hl2
elavl1b	dnmt3ab						u2af1
rfx4	angel2						LOC120482485
socs1b	LOC120488587						dctn6
gra	dis3l2						dctn6
cirbpa	nudt6						dctn6
LOC120474467	ttc13						dctn6
ddx5	LOC120492963						dctn6
il2rgb	deaf1						aig1
kdm6bb	aebp2						h3f3d
kdm6bb	znf346						ptenb
kdm6bb	rspo2						LOC120467769
kdm6bb	LOC120493434						LOC120485878
jarid2b	chka						cgnl1
arhgef4	nelfcd						spryd3
LOC120484552	atp1b4						cnot9
jarid2a	ino80e						itpkb
rsrc2	glula						ccpg1
cops2	sh3kbp1						cct2
znf740a	LOC120471051						dctn2
ssr1	LOC120471051						tlk1b
klhl22	slc4a4a						abcf1
klhl22	zgc:153372						mrm3a
klhl22	aimp1a						maco1a
LOC120480753	cdc37						si:ch73-111k22.3
enosf1	ube2q2						pdpk1a
rspo2	zdhhc23b						scospondin
LOC120482050	zdhhc23b						pdap1a
LOC120482050	zdhhc23b						ncoa6
LOC120487539	zdhhc23b						acyp1
LOC120473156	dennd4c						ccar1
LOC120489287	dixdc1a						b3galt2
LOC120479063	chchd7						ubl7b
LOC120482985	chchd7						ubald1a
p2ry13	chchd7						dennd4c
p2ry13	chchd7						taf5
p2ry13	chchd7						sart1
LOC120494829	chchd7						aldh4a1
LOC120481577	atf7b						erc1a
il13ra1	atf7b						txndc15
itpr1b	atf7b						prex1
LOC120489276	atf7b						LOC120484105
	LOC120492029						arhgap29a
	ldb1a						acad9
	bod1						ppm1db
	rasa2						hgs
	socs1b						LOC120473548
	chd4a						rps3
	slc9a6a						taf10
	cav2						ankrd13c
	tsc22d1						caska
	acsl6						bicral
	limk2						LOC120490196
	tsc1a						LOC120490196
	tsc1a						LOC120490196
	tsc1a						tm9sf2
	tsc1a						nub1
	fryl						st8sia5
	chordc1a						LOC120485878
	si:dkey-197c15.6						aplp2
	mfsd14bb						pym1
	arhgef9a						ppiab
	si:ch211-200p22.4						mansc1
	aasdhppt						mansc1
	aasdhppt						mansc1
	aasdhppt						ncdn
	LOC120475818						ncdn
	cadm1a						cep19
	nr2c1						kat14
	glt1d1						kat14
	dram2b						khdrbs1a
	LOC120479522						khdrbs1a
	med14						gde1
	foxp2						tial1
	foxp2						polrmt
	akirin1						vps26a
	eif4ebp2						trim46b
	sms						taok2b
	LOC120473156						rps6kb1a
	spcs2						ppp4r1
	disp2						tafa5l
	LOC120485765						LOC120472139
	si:ch211-89o9.6						thap3
	ypel2b						LOC120480422
	elavl1b						igfbp2b
	dnaja1						frmpd3
	rbm12bb						dhrs13l1
	rbm12bb						mta3
	gp1bb						tmem242
	gp1bb						b4galnt4b
	pde11al						b4galnt4b
	LOC120479520						marcksl1b
	cd99l2						serbp1a
	cul5a						als2a
	med17						bloc1s6
	tmed1b						pafah1b2
	zgc:158803						pafah1b2
	march5l						LOC120478530
	ackr4b						dhcr24
	ackr4b						tmem11
	tmem14cb						ankrd13a
	cnot1						ankrd13a
	sgsh						si:dkey-110c1.10
	nlrc3l1						cirbpa
	tmem150c						si:ch211-79k12.2
	tmem150c						wars2
	tmem150c						LOC120467841
	tmem150c						tgif1
	kat7a						dock5
	si:dkey-18a10.3						rnf41
	zmym4.2						rnf41
	homer2						alkbh5
	LOC120481843						tmed7
	LOC120461937						LOC120469121
	naxd						mapk8ip3
	zgc:136971						plekho2
	snx9b						plekho2
	crygs1						LOC120476780
	uba6						brpf3b
	gpatch2						rtn1a
	pcloa						vapa
	LOC120482221						LOC120473285
	rbbp5						LOC120485296
	LOC120485876						LOC120475088
	LOC120485876						enosf1
	LOC120485876						abca1b
	LOC120485876						arhgap4b
	tle2a						add2
	zzef1						rnf170
	si:ch211-117c9.5						rnf170
	tcf12						LOC120467034
	tcf12						gab3
	polr3h						eif5a2
	polr3h						eif5a2
	kcnk10a						exoc5
	her8.2						mpp6b
	puf60b						gyg1a
	phax						bcas1
	tnc						golph3a
	hsp90b1						rtn1b
	arhgef4						LOC120471250
	LOC120473723						irf2bp2a
	snrnp35						dennd10
	LOC120464019						si:dkey-7j14.5
	znf341						nit1
	mcamb						dock3
	cbx7a						rab7a
	crtac1a						znf384b
	ascc1						hnrnpm
	ascc1						usp40
	mlf1						tfg
	ppp1r14ba						tfg
	LOC120462438						erbb2
	fam120b						fam13c
	heca						LOC120465032
	LOC120485600						zbtb47a
	taok2b						LOC120480073
	epb41l5						LOC120480977
	gatd3a						drd3
	gabpb2a						mrpl39
	gnl2						soul5
	ints3						asap1a
	ppm1da						crtac1a
	atp1b2a						ube2b
	syf2						cbx2
	pdcl3						maff
	ube2d4						lamc3
	si:ch211-195b13.1						fbxl15
	ccdc82						fbxl15
	si:dkey-190g11.3						ranbp10
	fnbp1a						ranbp10
	clpxa						ranbp10
	pigv						ranbp10
	xpo4						ranbp10
	LOC120494894						ranbp10
	LOC120494894						oafb
	LOC120494894						LOC120477832
	LOC120494894						si:ch211-180a12.2
	LOC120494894						ptrhd1
	ank2b						LOC120480605
	eif4h						chmp7
	LOC120495089						papss2a
	preb						rpl18a
	cyth3a						klhl2
	mettl15						rasd4
	jmjd7						pak5
	map4l						fam219ab
	ptprz1b						LOC120460720
	dnajb12b						cacna1da
	pum1						fam53c
	adra2c						fam53c
	smg7						dennd4c
	mrps2						LOC120467963
	rfc1						plod2
	eif2s1b						igf2bp2a
	unm_hu7910						pou4f1
	unm_hu7910						creld2
	celf1						ddx3xb
	celf1						vapb
	fhod1						sqstm1
	dcp1b						pitrm1
	dcp1b						rbm7
	tbc1d19						atl1
	per2						ptprsb
	smg1						ncoa5
	kank4						ncoa5
	kank4						tdrd3
	rab30						crot
	pex13						LOC120482111
	tbc1d23						ssh1a
	LOC120481357						stat5b
	ccdc88c						LOC120473216
	akt3a						eif2b2
	fbrsl1						LOC120477884
	edrf1						akirin2
	fam136a						arpin
	kdm1a						tmem39a
	med6						eif4h
	znf740a						asxl1
	med16						zgc:113274
	upp1						osbpl6
	upp1						sec24b
	cspg5a						wscd1b
	pde5aa						alkbh1
	pde5aa						src
	mbd3b						ddit3
	gabrb1						gxylt1a
	mepcea						cwc27
	mob1bb						nyap2a
	ston2						LOC120466858
	ppat						tktb
	vldlr						LOC120477700
	adam10a						nipblb
	ankrd6b						zgc:158254
	LOC120475253						nop56
	LOC120475253						znf76
	LOC120475253						calm2a
	cacna1c						atp6v0a1a
	prrt2						tardbpa
	prrt2						clec16a
	LOC120476328						prkar1aa
	LOC120492070						arid2
	LOC120492403						rps10
	cacna1da						rnf13
	hexdc						arl8bb
	LOC120480373						arl8bb
	mrps16						LOC120481577
	LOC120480339						ogfrl1
	picalma						snrpc
	oxsr1a						cpne3
	pecr						prr16
	ror1						prr16
	elmo2						dock10
	rhbdd1						rusc2
	dtx4b						LOC120475098
	c9orf72						LOC120483083
	si:ch211-140b10.6						dagla
	rtca						LOC120464298
	mvb12a						rpl6
	cul4b						papss1
	nudt3a						slc47a4
	nudt3a						slc47a4
	LOC120482132						pnpla6
	afg3l2						sox1b
	polr2m						LOC120486480
	sema5ba						LOC120486480
	plpp4						dnah3
	plpp4						kank1a
	ptprub						kank1a
	egln2						kank1a
	LOC120488195						agfg1a
	si:ch211-236h17.3						LOC120487062
	pygo2						tspan9a
	fam204a						mibp2
	st3gal3b						cldn1
	dpysl5b						zmp:0000000936
	dpysl5b						zmp:0000000936
	LOC120489191						LOC120487700
	cdh5						safb
	cbx7a						rpl27a
	scly						gfm1
	ube4a						lingo2
	rptor						lingo2
	kdm3b						lingo2
	tbc1d22a						ccz1
	LOC120491239						chchd4a
	eif1ad						ptdss1b
	eif1ad						plod2
	LOC120474475						rab6ba
	ap1g1						nudt8
	brd3a						dpy19l3
	gpr137						cdk2
	gpr137						paics
	si:ch73-103b9.2						paics
	si:ch73-103b9.2						ghitm
	mapk10						spg7
	mapk10						chchd2
	zmp:0000001236						pgap2
	zmp:0000001236						LOC120474740
	LOC120472752						LOC120474578
	shank3a						smcr8a
	pitpnab						LOC120493638
	pitpnab						map2k2b
	tia1						map2k2b
	snap29						ptprk
	tm7sf2						rpl31
	scn3b						rpl31
	rspry1						plp2
	rspry1						mxd3
	ankhb						kcmf1
	tcf3a						znf296
	kat2a						usp37
	LOC120461477						usp37
	bco2b						ankrd39
	smad1						LOC120492883
	hypk						tgm1l4
	LOC120460487						abcg4b
	ckmt2b						myo1d
	LOC120460883						LOC120494306
	si:dkey-7j14.5						slc49a3
	kif13ba						ccdc186
	hcar1-4						supt7l
	plpp2b						m17
	arl4ab						galnt12
	arl4ab						atp6ap1a
	LOC120464473						atp1b2b
	col13a1						arid1aa
	dync1li2						LOC120473285
	ypel5						ccdc65
	ypel5						gtf3c2
	ypel5						foxk2b
	uba1						LOC120469530
	uba1						fbxl3b
	ago4						kdm2ba
	ssu72						eif3f
	zgc:171704						med8
	bscl2						akap12a
	LOC120470745						kcnk3a
	lfng						tmcc2
	edn1						gtf3c2
	LOC120472752						gtf3c2
	tmem87b						map7d1b
	slain2						prdm8b
	paqr6						rab31
	tor1						pcdh10a
	spinb						wu:fb74b10
	fkbp14						LOC120487864
	rer1						scrib
	LOC120493435						magi1b
	syk						map3k21
	syk						fam193b
	fzr1b						LOC120471351
	LOC120470883						fzd8a
	mark3b						spartb
	ablim1b						ndufaf3
	sephs1						smpd2a
	sephs1						mta2
	sephs1						si:dkey-93h22.7
	sephs1						gjc1
	zgc:92744						gjc1
	ncor1						gjc1
	LOC120467971						gjc1
	sf3b4						gjc1
	usp36						ctnnb1
	acvr2aa						mark3b
	si:dkey-40c11.2						tlcd1
	calm3b						myh11a
	LOC120484708						ccdc85ca
	LOC120484708						LOC120472294
	mctp1a						slx1b
	vps26bl						pgm2
	tmtc3						sgta
	gk						enox2
	lztr1						si:dkey-106g10.7
	lztr1						ptprma
	tmem97						btbd9
	pax2a						kctd1
	LOC120493092						LOC120465385
	LOC120493096						pikfyve
	LOC120475096						mctp1b
	tpk2						manea
	arhgef7a						erlin1
	LOC120484712						LOC120475509
	LOC120484712						jak2b
	LOC120484712						jak2b
	arhgef10						ric8a
	si:ch211-218d20.15						cenpk
	kif1ab						LOC120464132
	ush1c						gas8
	LOC120470649						ascl1a
	LOC120477453						hadhab
	LOC120461653						srfb
	LOC120493280						ippk
	hdgfl2						bahd1
	hsf2						bahd1
	pou2f1b						bahd1
	nolc1						fndc10
	sulf1						LOC120495582
	clasp2						got1
	slc4a10a						fdps
	polr3f						LOC120482463
	baiap2a						pecam1
	baiap2a						nkain1
	tardbpa						colgalt1b
	golga2						dnajb6a
	czib						LOC120473872
	gcdhb						LOC120473872
	atp9b						mllt1b
	si:ch211-145o7.3						LOC120483702
	gtf2h5						ppp1r13bb
	LOC120473533						znf318
	deptor						znf318
	LOC120472752						atg14
	LOC120487493						plpp3
	LOC120459896						mntb
	htr4						inpp5b
	tp53bp1						drc1
	LOC120473856						si:dkey-178e17.1
	crmp1						fgf12b
	prc1a						hint1
	znf618						eif4e2rs1
	znf618						trim8b
	nav1b						mettl3
	cdh12a						mitfb
	tpd52l2b						rbbp5
	LOC120464770						LOC120464720
	tbcb						fzd1
	tbcb						rars2
	LOC120492803						chpt1
	LOC120474881						zcchc24
	rps6kl1						hprt1
	ten1						tatdn3
	fgl2b						dctn1a
	tafa1a						mid1ip1b
	chpfa						sptan1
	itprid2						eaf1
	LOC120471287						eaf1
	mmp23ba						si:cabz01036006.1
	max						pik3r1
	baxb						tmx1
	creld2						kif1ab
	arl13b						rpl24
	bloc1s6						vps72a
	lysmd3						LOC120475650
	gtf2h4						gpr107
	faah2a						epn3b
	mapk8a						LOC120494306
	arl15b						gng12a
	LOC120494509						gng12a
	palmdb						sox21b
	per1a						epb41l3b
	camsap1b						pdzk1ip1
	cpxm1b						LOC120487737
	ank1a						LOC120473250
	tmem184c						hm13
	si:ch211-197h24.6						bcap31
	gramd1ba						grid1a
	rc3h2						scrn2
	rc3h2						gabrb1
	rc3h2						invs
	acss2l						taf5l
	ktn1						arhgef10lb
	il10rb						golgb1
	wdr75						sec31a
	clasp2						alas1
	jph3a						alas1
	lin52						alas1
	dus1l						bora
	dus1l						limch1a
	mynn						lgals3bp.3
	ddx42						nin
	LOC120481441						cunh6orf62
	LOC120481441						LOC120491350
	LOC120481441						LOC120460354
	LOC120481441						fem1a
	LOC120477684						fem1a
	LOC120488713						snx24
	LOC120463410						chmp1a
	cop1						ddx1
	cltb						LOC120482435
	cltb						LOC120481031
	vimr2						ebna1bp2
	dnaaf9						polr2d
	LOC120464681						LOC120483715
	ift22						hsd17b12b
	rce1a						dnajc11a
	carhsp1						actn4
	nup43						pkdcca
	LOC120472247						rbm4.3
	pank1a						dbnla
	arl4d						wbp1
	znf512b						wdr25
	gga1						wdr25
	senp7b						wdr25
	pde6gb						LOC120463182
	hsd17b7						LOC120484907
	dynlt1b						lpar1
	LOC120459953						hmg20a
	plekha7b						fbxo28
	derl1						LOC120488925
	ogfod1						fastkd1
	si:dkeyp-27e10.3						phactr1
	elp2						gpc5c
	si:dkey-21p1.3						si:dkey-90l8.3
	si:dkey-69o16.5						si:dkey-90l8.3
	si:dkey-69o16.5						actr5
	raf1b						LOC120475514
	ube2e1						emc10
	mbnl2						eif4a1b
	pip5k1ca						osbpl10b
	LOC120470740						gna12a
	twsg1b						arhgap5
	dnm2a						LOC120463512
	itpr1b						dstyk
	qkia						LOC120483576
	eml1						LOC120475506
	dennd1a						LOC120475506
	LOC120471242						tmem107
	ptpn18						hlcs
	ptprua						b3glcta
	magixa						gpr85
	LOC120484804						b4galt3
	LOC120488933						LOC120463283
	nfx1						ifngr1l
	nfya						LOC120482690
	anapc5						eci2
	tgm1						kif1ab
	creb1a						clip2
	ncbp3						gemin6
	caskin1						ankle1
	LOC120473136						LOC120459971
	gng2						tmcc1b
	gng2						usp48
	gng2						barhl1b
	gng2						sh3bp4
	nsfa						klhdc2
	rps6ka4						si:dkey-174m14.3
	rps6ka4						dbr1
	map7d2b						ppp4r3b
	zgc:161969						si:dkeyp-72g9.4
	her12						si:dkeyp-72g9.4
	grk4						si:dkeyp-72g9.4
	gnptg						si:dkeyp-72g9.4
	glis3						fgf24
	glis3						polr1b
	LOC120488087						cers6
	si:dkey-219e21.4						LOC120480562
	camk2b1						ubald2
	LOC120475269						pigm
	per3						prrc2b
	rnf25						elac1
	si:dkey-30k6.5						LOC120467732
	LOC120492899						mrpl15
	LOC120492899						celf5a
	si:dkey-112e17.1						esyt1a
	ubash3ba						erap1b
	LOC120464883						tp53bp2a
	2021-03-06						tpbgl
	LOC120465426						LOC120467985
	ak3						trip11
	fdft1						slc30a6
	syt16						eps15
	syt16						ube2e3
	ints1						pld2
	map4k2						helb
	LOC120475892						kcnv1
	si:dkey-71h2.2						si:dkey-25e12.3
	ocel1						myt1lb
	cahz						nfyal
	ND6						asb3
	lrrn2						LOC120491985
	snrnp200						sox1a
	frmd4a						LOC120475035
	racgap1						grsf1
	racgap1						LOC120459962
	arhgap17b						clasp2
	arhgap17b						baz1a
	heatr6						sox4a
	srpk1a						cunh11orf58
	LOC120482316						zbtb14
	myo1b						zbtb14
	mstnb						LOC120464721
	arfgap1						rpl15
	ilf3a						fam163aa
	ilf3a						LOC120484853
	lypla2						cxxc5a
	lypla2						kdrl
	gnpat						ric3b
	phospho2						ift74
	phospho2						vangl2
	xpo1b						prr5a
	mfge8a						prr5a
	bada						psme3ip1
	kif1ab						luc7l
	lss						srsf10b
	LOC120471891						pgrmc2
	fam50a						ca10b
	LOC120484699						slc35g2b
	atg16l1						rnf139
	pin4						LOC120485843
	LOC120463830						ppm1nb
	cdc27						LOC120489360
	sh3kbp1						LOC120489360
	LOC120492192						LOC120489360
	LOC120490715						LOC120470813
	raf1b						p4hb
	raf1b						LOC120491929
	tra2b						slc25a1a
	LOC120486362						d2hgdh
	dvl1a						dvl1b
	LOC120473937						slc1a7b
	dpysl4						si:ch73-335l21.4
	hmgcra						hmgxb4a
	map7d3						cers2a
	pikfyve						cers2a
	LOC120491154						pdcl
	vil1						pdcl
	vil1						numbl
	LOC120485803						dhx32b
	hdac6						polr3b
	aars2						cnot1
	e4f1						adrm1
	cpvl						npbwr2b
	cdk5rap2						relb
	myo16						pex5
	tfpia						LOC120461923
	rrn3						commd1
	rrn3						fhip2b
	rrn3						tle2a
	dnm2b						acsl3a
	klhl24a						slain1a
	cdc14ab						trim9
	LOC120462474						ston2
	LOC120491401						irf2bpl
	LOC120491401						pou3f2a
	copa						sord
	taf2						dnmt1
	arhgap32b						LOC120495069
	ecm1b						nav1b
	LOC120482939						LOC120482314
	pou2f1b						desi2
	zmynd8						ddx3xb
	ncam1b						ehmt2
	fxn						pou2f1a
	scube1						gcgrb
	arid1aa						gcgrb
	ankfn1						si:dkey-27h10.2
	nucks1b						LOC120461953
	akt1s1						LOC120462053
	smarca1						LOC120462053
	LOC120476685						LOC120462053
	mtss1						csde1
	braf						exosc4
	ldah						zgc:66474
	LOC120491243						fbxl18
	smurf1						hps5
	micu1						srpk2
	arfip2a						LOC120486618
	ints1						heyl
	anks1b						LOC120461993
	mycbp2						elavl1b
	notum1b						fam83hb
	LOC120466742						fam199x
	adipor2						LOC120486501
	isca2						pex19
	larp7						dlg2
	arf2a						LOC120466687
	LOC120487746						atad1b
	acot11a						usp12b
	uri1						pex11g
	epn3a						bub3
	epn3a						cxxc5b
	nfya						LOC120463461
	slc29a1b						rnf126
	slc29a1b						dnm1a
	slc29a1b						LOC120481520
	slc29a1b						pdhx
	dnajc28						pigx
	tjp1b						ubap2l
	pelp1						ddx46
	LOC120493252						mapta
	ireb2						sgcb
	znf385c						LOC120480471
	pibf1						slc25a51b
	apool						anapc10
	slc45a1						anapc10
	LOC120485878						zdhhc12b
	mtrex						nrd1a
	kif1ab						gpr61
	mrps18c						galnt7
	LOC120480270						slc10a3
	rab3gap1						cunh14orf28
	LOC120495298						styx
	LOC120493165						ldlrad4a
	pacsin2						olfml2ba
	lad1						cdk5r2a
	nr4a1						brd3a
	clasp2						brd3a
	slc25a1b						rpl23a
	si:dkey-238c7.16						LOC120470277
	pbx3b						dtwd1
	kif21a						nav1b
	LOC120473247						LOC120475499
	LOC120476137						LOC120481085
	LOC120486048						aimp2
	slc25a26						hcn5
	ssbp3b						hcn5
	chp1						axin1
	mgaa						psmb6
	grip1						LOC120478364
	sh2d4a						klhl13
	sh2d4a						impact
	sh2d4a						impact
	smad6b						tmed3
	tnfa						dusp8a
	hgs						dusp8a
	tyk2						tbc1d4
	kdm2ba						zgc:112052
	aspn						LOC120460571
	thumpd2						eif3k
	tnikb						kpna4
	LOC120464053						tnk2b
	spire1b						keap1b
	cabp7b						keap1b
	sh2d5						keap1b
	sh2d5						nxn
	asap1a						LOC120464469
	si:dkey-85k7.10						lzts3b
	LOC120472266						LOC120492394
	pnpla7a						mtss1lb
	smu1b						sft2d3
	casp17						il11ra
	si:dkey-81h8.1						si:dkey-26i13.8
	si:dkey-81h8.1						tmem260
	si:dkey-81h8.1						LOC120489818
	si:dkey-81h8.1						phldb2b
	si:dkey-81h8.1						ndufb3
	si:dkey-81h8.1						dnm2a
	vkorc1						mmp23bb
	hdgfl3						uacaa
	LOC120477668						uacaa
	LOC120462321						LOC120477007
	scarb2a						xkr5l
	LOC120475729						eif3ha
	LOC120470709						tacc2
	usp20						nadka
	slc10a7						mex3b
	klf6a						LOC120467982
	slc29a3						dck
	tspan3b						cops6
	gbe1a						cops6
	ablim2						smad7
	tm2d3						zgc:63863
	ankha						svild
	bin1b						svild
	LOC120479445						svild
	ppp2r1ba						svild
	epb41a						svild
	acot7						svild
	mrpl42						dcun1d3
	chodl						kif14
	uhrf1bp1l						LOC120470913
	znf106b						eef1db
	znf106b						cunh5orf24
	znf106b						cunh5orf24
	LOC120470425						angptl1b
	bmf1						capn1a
	bmf1						LOC120466944
	tex30						phf21aa
	tpm3						LOC120459953
	vdac3						ccndbp1
	spock1						ndufa13
	nampt2						dzip1
	zgc:154006						dhx30
	arfip2b						phlda1
	LOC120483518						metrn
	LOC120483518						amigo3
	LOC120483518						rad54l2
	zmp:0000001200						sike1
	frmpd2						LOC120478671
	rundc3aa						kics2
	kpnb1						nab1b
	epb41l3a						pou3f3a
	fibpa						pdcd11
	LOC120482392						pdcd11
	ptpdc1a						exosc6
	phc3						LOC120493270
	itpr1a						nek7
	nudt22						vopp1
	nudt22						lrfn2b
	zgc:86896						zgc:101130
	LOC120489571						zgc:101130
	top1l						slc35a5
	hdac1						hnrnph3
	cltcb						ubap2a
	eif3eb						stard13a
	cplx3b						hdx
	scube1						LOC120491161
	LOC120474475						LOC120491161
	gpr83						LOC120491161
	ctbp2a						si:dkey-119f1.1
	ctbp2a						mcf2la
	ndfip1l						pax2a
	ndfip1l						zgc:65895
	LOC120470820						zmp:0000000660
	LOC120470820						brd3a
	camk2b1						kansl1a
	man2a2						fgfr2
	man2a2						zgc:171740
	LOC120475392						crebl2
	LOC120470629						pik3r2
	tial1						pik3r2
	LOC120463211						pik3r2
	LOC120477819						pik3r2
	LOC120485916						aftpha
	slc4a8						ythdf1
	adarb1a						LOC120487124
	cacnb2a						LOC120475729
	fam53b						cfap70
	fam53b						LOC120487953
	dnajc5ga						adcy8
	LOC120472171						LOC120473902
	mark4b						msmo1
	rxfp3						tmem240b
	LOC120477726						aarsd1
	casz1						sf3b2
	pdcd2l						LOC120492785
	nrd1b						spsb4a
	LOC120462412						LOC120465093
	rnf34b						irf2bp2b
	nktr						psma1
	nktr						snx25
	oard1						LOC120487800
	zmat5						hmbox1a
	tgs1						LOC120482316
	LOC120495522						col14a1a
	LOC120464053						zeb2b
	spsb4b						rbm27
	spsb4b						fam20b
	ip6k2b						sptan1
	nt5c1ba						zdhhc22
	si:ch211-40k21.5						pole4
	si:ch211-266o15.1						prrc2b
	LOC120482071						zgc:158803
	LOC120464302						sprn
	wu:fb63a08						c2cd5
	lrrc17						LOC120478363
	zmynd8						taf15
	gpd1l						si:ch211-256e16.3
	LOC120475488						pars2
	cpox						pars2
	mier3a						ptpro
	sgsm1a						LOC120470073
	ern2						dlk2
	dhcr7						calr
	slc25a18						kiz
	slc25a18						reep1
	mblac2						LOC120480998
	LOC120460209						LOC120480998
	LOC120472170						LOC120480998
	LOC120461428						frg1
	rab33ba						LOC120463190
	LOC120493020						LOC120463190
	arhgap17b						LOC120463190
	ap5z1						LOC120463190
	chfr						LOC120462809
	elovl2						tiam1b
	sgce						tiam1b
	tacr3a						tiam1b
	ubxn7						anln
	kiz						LOC120481257
	cep76						LOC120483791
	slc44a5b						emsy
	LOC120481561						cunh6orf89
	LOC120474786						dlg1b
	LOC120474786						ank2b
	tfeb						dab2ipa
	ldb2b						srp54
	zdhhc18b						LOC120486757
	LOC120460491						mbnl2
	homer2						stxbp3
	mustn1b						LOC120463629
	erbb3b						wdr20a
	ralaa						atrn
	plekha7b						si:ch73-362m14.4
	kcnh2a						si:ch73-140j24.4
	LOC120460280						slc47a1
	LOC120491258						LOC120465369
	LOC120470761						nfkbil1
	klhl20						cass4
	LOC120481731						LOC120493607
	cacna1da						rbm28
	si:ch211-195b21.5						tada1
	ptbp2a						bri3
	cluap1						tmem169a
	arhgef2						tmem169a
	sik2a						LOC120461598
	LOC120473282						kat7a
	cadps2						dync1h1
	psmd4a						rab14l
	mmrn2a						rab14l
	phlda3						rab14l
	cunh11orf65						rab14l
	abtb2b						sorbs2a
	tprb						satb2
	npas4l						map7d1b
	cacul1						LOC120472127
	cry1b						LOC120472127
	LOC120459949						LOC120472127
	LOC120467967						LOC120472127
	lsm14aa						LOC120472127
	epha4b						pik3ap1
	si:ch1073-145m9.1						gpr27
	LOC120492270						LOC120476291
	polr1f						LOC120482771
	dhx15						erc2
	gbp2						foxb1a
	gbf1						elovl7a
	LOC120484220						cmtr2
	pip4k2aa						cmtr2
	senp5						cacna1da
	senp5						mep1a.1
	lama4						usp25
	LOC120476231						tctn1
	LOC120476231						igsf3
	LOC120473277						pdia5
	LOC120473655						LOC120478348
	gpr158a						pikfyve
	soat1						arvcfa
	gne						pomt1
	med21						pomt1
	hmbox1a						ctsa
	egfl6						LOC120466804
	mmp16b						LOC120470913
	stx12l						snrpb
	cttnbp2nlb						cdk5r2b
	ablim1b						fzd3b
	unm_hu7910						rxfp2a
	unm_hu7910						siae
	tmem267						kif5aa
	tmem267						si:dkeyp-113d7.1
	LOC120483042						si:dkeyp-113d7.1
	tacc2						unc119b
	slc4a5b						LOC120478631
	gemin8						LOC120469652
	ppargc1b						opn7c
	pbx1a						irf2bp1
	slc6a9						cdc16
	slc6a9						LOC120461348
	slc6a9						gpr132b
	slc6a9						LOC120467962
	LOC120486394						gps1
	LOC120486394						trpc4apb
	tent2						LOC120459655
	pik3r3a						ggps1
	LOC120490776						svila
	ankrd46b						gipc1
	ankrd46b						zbtb8os
	ankrd46b						ppargc1a
	ttyh2l						trit1
	top2a						LOC120471319
	mtx1b						cldn5b
	tfap2a						b3gnt7
	LOC120475519						stx5a
	LOC120485110						phaf1
	polr3glb						stom
	clec16a						tmtc1
	LOC120472247						phb2a
	LOC120484551						neurl1b
	tspy						LOC120483528
	pbxip1a						si:ch211-107o10.3
	rims2a						olfm1b
	mier3a						ephb3a
	polr1e						tab1
	arhgap12b						pgam1b
	cul5b						fam110b
	bpnt1						zgc:101566
	bpnt1						stx3a
	chchd3a						zgc:165508
	nsdhl						adamtsl7
	nsdhl						LOC120477885
	prlhr2b						LOC120487925
	prlhr2b						ralgapa2
	slc8a2a						hspa4b
	LOC120480588						cstf2
	ss18						skap2
	LOC120471997						si:dkey-88e18.8
	edc4						muc13a
	LOC120462932						cotl1
	bcam						LOC120488821
	cep131						megf6
	sqlea						scai
	slc25a27						LOC120461954
	slc25a27						LOC120488933
	slc25a27						larp6a
	LOC120479323						klhl8
	arap3						prepl
	zgc:172182						syt13
	akip1						poc1b
	zgc:172339						poc1b
	nr1d4a						poc1b
	kmt2ba						LOC120487652
	LOC120471994						LOC120487652
	LOC120471994						fzd3a
	erich2						l3mbtl1
	idi1						l3mbtl1
	LOC120460573						l3mbtl1
	LOC120490823						noxred1
	LOC120490823						ddx58
	LOC120490823						rabl6a
	sept5a						mark4b
	ank1a						sptlc2a
	bpnt2						dclk1a
	chfr						gpr75
	klhdc7a						LOC120485490
	si:ch211-40k21.5						pnrc1
	brwd3						mef2ca
	LOC120475602						mef2ca
	LOC120495190						si:dkey-177p2.6
	dnlz						zcchc14
	robo4						rtn4r
	LOC120489754						LOC120481475
	ube2q2						thumpd1
	igfbp7						vps41
	rbm39b						pja2
	LOC120474396						rmnd1
	LOC120470133						rbm34
	si:ch73-314g15.3						fam210b
	nfya						znf131
	nfya						znf131
	ino80						shmt2
	acsl2						spred3
	tafa1a						ap2m1b
	grb14						ap2m1b
	stxbp5b						tep1
	nprl3						zw10
	selenoi						trpm7
	LOC120477379						vti1a
	rab3gap2						bnc1
	nos1apb						ephb6
	nedd4a						rhbdf1a
	LOC120475416						znf385d
	LOC120475416						rasal2
	dclre1c						sobpa
	LOC120475416						flt1
	pgam1a						kcnk10b
	adcy3a						ablim1a
	pbx4						rps12
	LOC120491941						LOC120473374
	LOC120485868						map7d2a
	si:dkey-195m11.11						h3f3c
	si:ch211-112c15.8						mast3b
	LOC120480029						slc12a4
	hspg2						clcn4
	cdon						si:ch211-160d14.6
	LOC120469089						ptprdb
	adgrl1a						ap1ar
	LOC120461551						rpp30
	LOC120461551						LOC120477471
	apba2b						lman2lb
	LOC120480159						LOC120477782
	tm9sf1						LOC120482259
	tm9sf1						gpank1
	apbb2b						gpank1
	LOC120483657						fuz
	thg1l						fuz
	LOC120463394						gsna
	LOC120492915						zgc:165508
	gpr78b						camk2d2
	chd5						LOC120465368
	fgfbp1a						pemt
	clasp1a						LOC120479123
	LOC120485494						tdg.2
	LOC120485494						sfrp2l
	LOC120485494						jph3b
	eya2						sh2b3
	iqcg						LOC120484950
	nek11						man2b1
	ccng2						smurf1
	grik4						shank2b
	grik4						eif2ak2
	grik4						agfg1b
	LOC120475729						LOC120473840
	porcnl						rab38c
	ip6k1						si:dkey-31c13.1
	ip6k1						LOC120491853
	gucy1b1						ttyh1
	LOC120471973						ttyh1
	LOC120461099						wdr45b
	trpc2b						myo15ab
	atp8b2						rrp12
	LOC120480110						LOC120486595
	LOC120468557						LOC120486595
	elp3						stab1
	kiss1rb						smarcd1
	LOC120464048						hdlbpa
	acvr2ab						anp32e
	arl1						tacr1a
	LOC120475430						znf16l
	mettl1						LOC120474234
	zcchc4						LOC120495427
	hnrnpk						LOC120481721
	camsap1a						rest
	lpin1a						lysmd2
	LOC120476176						syt4
	LOC120476176						LOC120468056
	LOC120476176						sgce
	sptlc2b						rfwd3
	LOC120461445						LOC120481684
	maneal						oxr1a
	hscb						LOC120479881
	magi1b						mepceb
	LOC120490941						mepceb
	dact3a						zgc:162200
	sec16a						dnajc9
	zgc:63587						dnajc9
	otud7b						radil
	otud7b						LOC120478302
	pbx3b						LOC120460302
	LOC120479806						cacng2a
	LOC120468252						ttf2
	LOC120468252						syngr3a
	LOC120494176						mfsd2b
	meig1						LOC120471041
	arhgap9						LOC120493789
	abi2a						zdhhc14
	LOC120477082						hipk1b
	pxk						rdh14b
	LOC120485633						riox2
	cipcb						riox2
	LOC120466786						LOC120476758
	LOC120491477						stk35
	qsox2						bdnf
	zgc:194398						alyref
	ncam1b						sept7a
	cep57						ywhaqa
	LOC120462285						huwe1
	pex5						rac3b
	pex5						LOC120462114
	LOC120492897						LOC120473711
	csf1a						epb41l3a
	efcab7						LOC120460340
	LOC120464589						rgs17
	dph7						tmem264
	syt19						LOC120475244
	trappc5						LOC120475244
	LOC120482948						impdh2
	LOC120485925						hdac4
	LOC120486362						LOC120491731
	LOC120477384						ical1
	smc5						ical1
	nxf1b						LOC120469679
	LOC120484902						LOC120461963
	brdt						skib
	LOC120482453						insyn1
	LOC120482453						insyn1
	LOC120485982						insyn1
	pfkla						insyn1
	arg1						LOC120471315
	LOC120495018						disc1
	naprt						LOC120474231
	LOC120477782						znf276
	nfxl1						rreb1b
	taok2b						scrt1a
	slc6a2						LOC120467779
	tgm8						atp11c
	gal3st2						atp11c
	LOC120493252						LOC120492385
	ecm2						rgs7b
	rassf7a						lhfpl4b
	rassf7a						LOC120466859
	rassf7a						LOC120466859
	scn1lab						dbn1
	scn1lab						LOC120471192
	LOC120491883						LOC120471209
	LOC120494548						adcy1b
	LOC120494548						plekhg5a
	puraa						LOC120477944
	tysnd1						eipr1
	ppp2r2cb						igsf21a
	gpr182						rps5
	fryl						chmp1b
	hnrpkl						mmrn2b
	znhit1						LOC120491897
	acbd3						LOC120491897
	ints2						manba
	ints2						LOC120466805
	apc2						spred1
	ssrp1a						shroom2b
	LOC120467793						smg7
	asb7						rhoj
	pde9al						scrt2
	cnga2a						adss2
	LOC120495451						plekha6
	cap1						hnrnpr
	cap1						hnrnpr
	LOC120459065						LOC120471214
	LOC120463969						LOC120465305
	ecscr						vcla
	pi15b						smad4a
	cse1l						lrrfip2
	git2b						park7
	cdkn1ca						LOC120464703
	glsb						ankrd46a
	LOC120469154						erc1b
	si:ch211-106h4.9						nog2
	LOC120473759						fbxl14a
	LOC120470174						chp2
	myo15b						ctnnd1
	vamp8						ctnnd1
	fkbp15b						brms1lb
	LOC120489416						cnbpb
	sez6b						zswim6
	LOC120463972						gabra4
	LOC120491152						LOC120475348
	comta						eif5
	antxr1d						fam8a1a
	LOC120481672						LOC120487635
	LOC120481672						emc4
	LOC120488405						kirrel3a
	LOC120470491						zgc:113162
	b3galnt2						si:ch1073-335m2.2
	si:ch211-79m20.1						bop1
	nup188						eif2s2
	ift140						fndc3a
	LOC120462126						tcf7l2
	si:ch211-232m10.6						LOC120488110
	adra1ab						LOC120488110
	LOC120486730						zer1
	LOC120482194						eif2ak1
	LOC120476380						ndufb2
	pfkfb2b						picalmb
	hus1						LOC120492825
	LOC120489392						npsn
	e2f3						LOC120486217
	cdc42ep2						nfatc1
	cdc42ep2						ankrd6b
	ca12						rtn1b
	tspan35						rapgef4a
	LOC120471237						cthrc1a
	pyroxd1						decr2
	cryba2a						tsnare1
	nemp2						LOC120479269
	st6galnac1.1						LOC120479269
	lto1						syt7b
	LOC120492320						setx
	LOC120489832						grapa
	ctbp2l						slc16a2
	ik						pnpla2
	LOC120494774						psmd11b
	cfap92						dars2
	myh11b						cd2bp2
	wnk4b						atp9b
	cadps2						cdk12
	pax2b						LOC120476475
	polr1h						vgll4b
	sec31a						dhtkd1
	LOC120490281						mis18bp1
	LOC120468748						mis18bp1
	LOC120468748						LOC120481855
	LOC120481534						nars2
	LOC120462127						ssna1
	LOC120461118						tfap4
	cd81b						LOC120462182
	chrna2a						LOC120465388
	LOC120464710						dyrk1aa
	hdac5						dyrk1b
	LOC120485079						epc1a
	LOC120468972						LOC120481767
	LOC120473518						letm2
	mpz						letm2
	heatr4						chmp4bb
	katnal1						cers2b
	rif1						nfia
	LOC120493631						si:ch211-222l21.1
	steep1						ctbp2a
	nr2f5						arhgef4
	mgst1.2						ccdc92
	mgst1.2						ccdc92
	lemd1						ccdc92
	col22a1						ccdc92
	kcnn2						LOC120486335
	znf536						arpc5a
	efhb						LOC120482650
	LOC120464038						LOC120489360
	LOC120475449						gmpr
	adamts8a						LOC120488047
	prdm4						bicra
	unc50						LOC120463041
	cunh11orf54						LOC120473532
	acvr1ba						camlg
	tmem14ca						bend5
	immp2l						timp2b
	nlgn2a						LOC120488060
	nlgn2a						LOC120495417
	nlgn2a						zfand3
	nlgn2a						ube2ka
	kcnh2b						mark3b
	LOC120473638						idh3g
	itpr1b						traf2b
	slc1a5						ppip5k1a
	cc2d2a						hsdl2
	LOC120480555						slc25a19
	sox11a						reep3b
	zmynd12						agbl5
	LOC120489245						lhfpl2a
	zgc:163143						lhfpl2a
	rbpms2a						lhfpl2a
	tbrg1						fbxo42
	slc27a1a						LOC120474036
	LOC120472068						insig2
	cldn11b						si:ch211-222l21.1
	si:dkey-66i24.7						zgc:158376
	adam8b						si:ch211-107p11.3
	faap100						cntn1a
	tatdn1						ptgir
	rgs12a						sh3glb2b
	cables1						nepro
	nap1l4a						sar1b
	LOC120491258						st3gal3a
	rhbdf1a						cnr1
	rhbdf1a						gria4b
	cdc42se2						LOC120493693
	cdc42se2						LOC120493693
	cdc42se2						LOC120493693
	cdc42se2						dqx1
	shprh						dqx1
	LOC120492810						tfe3b
	LOC120492810						LOC120462465
	chrdl2						papss2b
	LOC120462630						hdgfl3
	apbb3						ccni
	calca						LOC120484110
	pdlim5a						aldh3a2a
	LOC120492267						aldh3a2a
	LOC120487998						aldh3a2a
	wnk1b						arnt2
	cryzl1						zmp:0000000529
	fnbp1a						slc5a5
	si:ch211-212d10.2						si:ch211-277c7.7
	LOC120489558						mrpl16
	LOC120495493						prdx5
	tln2a						sar1aa
	calm1b						LOC120459045
	zdhhc18b						LOC120472127
	slc43a2a						dohh
	LOC120459942						tox4b
	zgc:162952						mov10l1
	acsl1a						cxxc5a
	mtrf1l						cxxc5a
	LOC120490183						cxxc5a
	LOC120475782						LOC120485424
	LOC120470848						cux1b
	bpgm						upf3a
	asap3						ptprsb
	LOC120474232						asah1b
	kiaa1549la						raf1a
	celf6						LOC120477427
	LOC120491190						LOC120475692
	LOC120475406						phb
	LOC120491986						specc1
	ubl3b						LOC120491954
	tcf7						sncgb
	lgalslb						sncgb
	selenon						LOC120464017
	wrn						rnps1
	LOC120478350						frmd4a
	mrpl27						si:ch211-15d5.11
	cdh10a						supt5h
	gpcpd1						ppp3cb
	gpcpd1						syngap1a
	stpg4						LOC120471021
	neurod4						LOC120460159
	glsb						micall2b
	LOC120473464						LOC120485489
	rfx1b						larp1
	tmie						mrc1b
	map1lc3b						LOC120473264
	rgs12a						LOC120460603
	strada						rnf115
	strada						rai14
	strada						prrc2b
	sorbs3						si:dkey-96l17.6
	sorbs3						cabp2a
	sorbs3						gpr183a
	sorbs3						LOC120461346
	evlb						fgf2
	sdf2						fbxl7
	cnot1						fbxl7
	car15						LOC120488460
	nrcamb						ubtd2
	ptger1c						LOC120483562
	tube1						cebpz
	slc2a3a						sf3a2
	si:dkey-21a6.5						iqsec2b
	cnsta						sox2
							LOC120474230
							fblim1
							zbtb45
							pisd
							LOC120479631
							cntrob
							LOC120473079
							itcha
							atp2b3a
							tmem26a
							sgip1a
							cpeb1a
							kiss1
							secisbp2l
							ptbp3
							taf6l
							rela
							LOC120479221
							LOC120485608
							fbxl17
							LOC120480199
							magl
							sox9a
							LOC120487746
							cant1b
							cant1b
							jakmip1
							LOC120466809
							ssrp1b
							taok2a
							ankrd11
							LOC120469872
							exoc3l2a
							LOC120468987
							npm1a
							LOC120471303
							stub1
							klhl5
							pdlim1
							zc3h10
							ccdc153
							fscn1b
							utp6
							rbm15b
							arfgap3
							cnot11
							cldnd1a
							camk2b1
							zgc:112416
							rab27a
							slc30a10
							rad18
							smad4a
							get1
							LOC120481059
							kdm6al
							LOC120488449
							gps1
							dgkaa
							LOC120492801
							LOC120492801
							slc16a12b
							tyw5
							LOC120471650
							fhip1aa
							LOC120481213
							plpp2a
							plxdc1
							gas6
							hmcn2
							bloc1s5
							pecam1
							pecam1
							toe1
							zgc:92242
							zgc:153115
							zgc:153115
							zgc:153115
							zgc:153115
							LOC120484869
							ehd4
							nrxn1a
							slc25a44a
							si:zfos-741a10.3
							txndc11
							dchs2
							cenatac
							kdm2ab
							neurod6b
							sec16a
							akap12b
							sash1a
							atf6
							igflr1
							LOC120485520
							angel1
							sema3d
							kirrel3b
							zbtb22a
							nbr1b
							cntfr
							pdha1a
							rgmd
							atp6ap2
							c3a.4
							LOC120479081
							LOC120482466
							glra2
							si:zfos-932h1.3
							LOC120470175
							mfsd8
							mxra8b
							LOC120461974
							LOC120471329
							LOC120464522
							LOC120495459
							LOC120464477
							LOC120483352
							trim13
							trim13
							trim13
							LOC120494211
							ric8b
							LOC120484731
							mpp6b
							ccdc3b
							LOC120459975
							LOC120459975
							LOC120459975
							atp5mc3a
							dsg2l
							mov10a
							si:ch211-178n15.1
							sapcd2
							sapcd2
							sapcd2
							LOC120467960
							LOC120483543
							LOC120463028
							cep135
							ppfia1
							nup133
							nfasca
							celf2
							LOC120477363
							tcf3a
							zgc:77262
							LOC120475504
							si:ch211-51e12.7
							vps54
							rpl7l1
							hhipl1
							smarcad1b
							fbxw5
							wacb
							avpr2aa
							pitpnaa
							rad23ab
							ssbp3b
							LOC120479461
							LOC120475762
							npffr2a
							unc13a
							LOC120492116
							twf1a
							LOC120476132
							LOC120481662
							ulk2
							kcnq5a
							ociad1
							ddx46
							cdc42
							fam169ab
							LOC120475069
							naxd
							pik3c3
							LOC120481360
							plrg1
							tpgs1
							map6a
							nfyc
							nfyc
							nfyc
							LOC120464103
							LOC120464068
							lrp6
							LOC120479630
							LOC120485520
							LOC120486095
							map3k1
							bag5
							rbfox2
							rps23
							nelfa
							aoc2
							ric1
							sod2
							slc2a3b
							slc2a3b
							acacb
							sh2b1
							sh2b1
							wdr43
							dido1
							psme4a
							LOC120489245
							bambia
							vezf1b
							ppm1la
							LOC120459607
							LOC120477705
							tfap2d
							kctd12b
							znf653
							2021-03-09
							ankle1
							LOC120463674
							taf6l
							cmtm7
							ndufb8
							si:dkey-5i3.5
							LOC120480598
							tp53bp1
							LOC120463543
							LOC120478200
							nectin3b
							smim22
							ttc9b
							fam98b
							rerg
							LOC120485301
							pfkfb4b
							LOC120469700
							trim36
							rnf19b
							map7d2b
							ythdf2
							LOC120488286
							LOC120488286
							LOC120488286
							riok1
							dusp7
							elovl5
							optn
							fgd
							gc2
							plecb
							LOC120464745
							mxi1
							epb41l4a
							pisd
							pisd
							pou2f1a
							dok1b
							tbc1d20
							snx2
							LOC120460396
							epb41a
							LOC120474501
							dnm1a
							col4a4
							wnk1b
							gtf2e2
							tango2
							ubxn2a
							fam43b
							LOC120480196
							ctnnb1
							zgc:65894
							LOC120492437
							LOC120475927
							LOC120474042
							dbn1
							map3k4
							purba
							mag
							cdc14b
							ftsj1
							ftsj1
							LOC120488737
							col6a3
							LOC120487071
							b3gnt3.4
							pxylp1
							znf618
							gnb1a
							gnb1a
							gnb1a
							ly75
							erf
							odf2b
							brsk2a
							kbtbd3
							kbtbd3
							kbtbd3
							casc3
							slc35a1
							dclk1b
							engl
							LOC120483006
							vps52
							zgc:101100
							ino80b
							rxfp3.3b
							LOC120473975
							cunh18orf25
							maf1b
							LOC120471449
							LOC120471449
							mfsd14a2
							nrxn2a
							thbs1b
							patl1
							LOC120491164
							asb8
							asb8
							asb8
							raf1a
							LOC120486174
							LOC120464347
							LOC120467714
							bcl6ab
							LOC120467824
							relch
							ei24
							ei24
							cfap73
							mical2b
							LOC120485055
							LOC120460373
							LOC120460373
							LOC120460373
							fas
							fxr1
							LOC120489241
							xkr7
							LOC120471831
							wnk1a
							slc25a25b
							mtmr12
							lingo3a
							olfm2a
							fyco1b
							mef2aa
							cacna1ia
							slitrk3a
							LOC120471948
							ptgs2a
							dcp1a
							reln
							LOC120481558
							prima1
[truncated: 580 more rows]

## Sheet: gProfiler Intersections
sex	module/group	source	term_name	term_id	adjusted_p_value	negative_log10_of_adjusted_p_value	term_size	query_size	intersection_size	effective_domain_size	intersections
female	MEred	GO:MF	transcription corepressor binding	GO:0001222	0.000523745	3.28088	4	833	4	24485	PER1B,PER2,PER1A,PER3
female	MEred	GO:MF	protein binding	GO:0005515	0.00120606	2.91863	7839	833	328	24485	EIF3C,COPS2,KDM6BB,HSP90AA1.2,PER1B,FKBP4,BRWD1,MAPRE3A,KLHL22,HSPA5,DNAJB1A,PWP2H,P4HA1A,ARNTL1B,BNIP3,ING4,HSP70.3,PPP1R37,KCTD7,CTNND2B,KDM1A,SI:CH211-114C17.1,PHF6,CAMK2N2,HERPUD1,KCTD9B,MBTD1,VAPB,WDR35,SNAP91A,DBN1,DGCR8,SI:DKEY-19E4.5,AHSA1B,YY1A,WWP2,TJP1B,APBA2B,CAPZB,SMO,NSFL1C,PSME4B,FGFR2,STXBP5A,SUDS3,IL2RGB,GLI1,PBRM1L,ARHGEF10LA,SETD7,CARMIL3,MAPRE1B,KIF5BB,C1QTNF1,SH3RF2,TTC13,SH3…
female	MEred	GO:MF	binding	GO:0005488	0.00728516	2.13756	16633	833	620	24485	EIF3C,COPS2,SAFB,KDM6BB,U2AF2B,HSP90AA1.2,EIF4A2,PER1B,HNRNPABB,CRY2,SRSF5A,POLDIP2,JARID2A,JARID2B,FKBP4,RECQL5,RFX4,BRWD1,HSPA4A,MAPRE3A,KLHL22,HSPA5,HMGB3B,PSPC1,RBM17,DNAJB1A,HNRNPK,PWP2H,CIRBPA,P4HA1A,ITPR2,LSM14AB,SNX7,HSPA13,HSF1,DCAKD,CELF3A,ARNTL1B,DDX17,MINK1,BNIP3,TMPOA,ING4,HSP70.3,PPP1R37,TRA2A,CNOT7,KCTD7,CTNND2B,KDM1A,SI:CH211-114C17.1,CIARTA,SERPINH1B,TIA1,CHD4A,PHF6,CAMK2N2,CELF1…
female	MEred	GO:MF	cytoskeletal protein binding	GO:0008092	0.0235559	1.6279	779	833	48	24485	MAPRE3A,DBN1,CAPZB,STXBP5A,MAPRE1B,KIF5BB,EPB41L5,MAP4L,MBD3B,DPYSL5B,KIF13BA,TOR1,ABLIM1B,SI:DKEY-40C11.2,KIF1AB,USH1C,PRC1A,ITPRID2,CAMSAP1B,KTN1,DNM2A,EML1,MYO1B,VIL1,MYO16,MTSS1,KIF21A,SPIRE1B,ABLIM2,BIN1B,EPB41A,TPM3,EPB41L3A,ZGC:86896,ARHGEF2,CLASP1A,CAMSAP1A,PXK,CEP57,APC2,CAP1,SI:CH211-106H4.9,MYH11B,KATNAL1,PDLIM5A,TLN2A,MAP1LC3B,EVLB
female	MEred	GO:MF	transcription coregulator binding	GO:0001221	0.0328541	1.48341	8	833	4	24485	PER1B,PER2,PER1A,PER3
female	MEred	GO:BP	organelle organization	GO:0006996	1.29148e-05	4.88891	2126	769	124	21828	PPHLN1,BRWD1,MAPRE3A,PWP2H,LSM14AB,SETB,MINK1,BNIP3,TMPOA,ING4,TSC1A,KDM1A,MBTD1,CDK2AP2,VAPB,WDR35,SNAP91A,DBN1,CAPZB,SMO,NSFL1C,HIGD1A,PBRM1L,MAK,MAPRE1B,INO80E,LIMK2,CHORDC1A,SI:CH211-200P22.4,TMED1B,EPB41L5,PREB,MAP4L,FHOD1,KANK4,PEX13,PICALMA,ELMO2,DYNC1LI2,TOR1,RER1,MARK3B,ABLIM1B,SI:DKEY-40C11.2,PAX2A,ARHGEF10,BAIAP2A,GOLGA2,CRMP1,PRC1A,TEN1,BAXB,EML1,ANAPC5,MAP7D2B,RACGAP1,ARHGAP17B,MYO1B…
female	MEred	GO:BP	regulation of circadian rhythm	GO:0042752	0.000111551	3.95253	25	769	9	21828	PER1B,CRY2,SI:CH211-132B12.7,CIPCA,PER2,PER1A,PER3,CIPCB,SCN1LAB
female	MEred	GO:BP	cellular process	GO:0009987	0.000912797	3.03963	19000	769	711	21828	EIF3C,SAFB,KDM6BB,U2AF2B,HSP90AA1.2,PER1B,PPDPFB,CRY2,POLDIP2,SI:CH211-132B12.7,PPHLN1,CIPCA,AMD1,FKBP4,TPST1,RECQL5,KAT5B,RFX4,BRWD1,SERP2,RYBPA,MAPRE3A,KLHL22,HSPA5,CERS1,HMGB3B,RBM17,DNAJB1A,NAA40,HNRNPK,SLC16A3,PWP2H,CIRBPA,P4HA1A,ITPR2,LSM14AB,SNX7,SETB,HSF1,SH3BP5A,DCAKD,ARNTL1B,SLC1A2B,DDX17,PPIG,MINK1,BNIP3,TMPOA,ANAPC16,ING4,FASTKD3,HSP70.3,SRRT,TRA2A,CNOT7,ST8SIA5,TSC1A,ATF4A,KCTD7,GDI2…
female	MEred	GO:BP	cellular localization	GO:0051641	0.00279895	2.55301	1427	769	84	21828	PPHLN1,MAPRE3A,ITPR2,BNIP3,ZDHHC24,RABGAP1L,MCOLN1A,VAPB,RGP1,WDR35,SNAP91A,SMO,RAB21,TMEM50A,MAK,DOP1B,MAPRE1B,SI:CH211-200P22.4,TMED1B,SNX9B,PHAX,SI:DKEY-190G11.3,XPO4,ANK2B,PREB,PUM1,PEX13,TBC1D23,CCDC88C,STON2,PICALMA,AP1G1,ARL4AB,DYNC1LI2,TMEM87B,TOR1,RER1,SYK,MCTP1A,VPS26BL,CLTB,ARL4D,GGA1,DNM2A,ITPR1B,NSFA,MYO1B,XPO1B,MYO16,COPA,ANKFN1,ARFIP2A,ARF2A,GRIP1,SCARB2A,ARFIP2B,KPNB1,ITPR1A,CLTCB…
female	MEred	GO:BP	cellular component organization	GO:0016043	0.00293428	2.5325	4019	769	192	21828	PPHLN1,BRWD1,MAPRE3A,PWP2H,LSM14AB,SETB,MINK1,BNIP3,TMPOA,ING4,TSC1A,KCTD7,CTNND2B,KDM1A,SERPINH1B,PLEKHA8,KCTD9B,MBTD1,CDK2AP2,VAPB,WDR35,SNAP91A,DBN1,PUF60A,CAPZB,SMO,PRELID3A,NSFL1C,HIGD1A,GLI1,CSPG5A,PBRM1L,MAK,MAPRE1B,INO80E,CAV2,LIMK2,FRYL,CHORDC1A,SI:CH211-200P22.4,AKIRIN1,TMED1B,ZGC:158803,PUF60B,TNC,CRTAC1A,TAOK2B,EPB41L5,EIF4H,PREB,MAP4L,PUM1,FHOD1,KANK4,PEX13,STON2,CACNA1DA,PICALMA,ELM…
female	MEred	GO:BP	cellular component organization or biogenesis	GO:0071840	0.00718673	2.14347	4176	769	196	21828	PPHLN1,BRWD1,MAPRE3A,PWP2H,LSM14AB,SETB,MINK1,BNIP3,TMPOA,ING4,TSC1A,KCTD7,CTNND2B,KDM1A,SERPINH1B,PLEKHA8,KCTD9B,MBTD1,CDK2AP2,VAPB,WDR35,SNAP91A,DBN1,PUF60A,CAPZB,SMO,PRELID3A,NSFL1C,HIGD1A,GLI1,CSPG5A,PBRM1L,MAK,MAPRE1B,INO80E,CAV2,LIMK2,FRYL,CHORDC1A,SI:CH211-200P22.4,AKIRIN1,TMED1B,ZGC:158803,PUF60B,TNC,CRTAC1A,TAOK2B,EPB41L5,EIF4H,PREB,MAP4L,PUM1,FHOD1,KANK4,PEX13,STON2,CACNA1DA,PICALMA,ELM…
female	MEred	GO:BP	rhythmic process	GO:0048511	0.00741457	2.12991	109	769	15	21828	PER1B,CRY2,SI:CH211-132B12.7,CIPCA,PSPC1,ARNTL1B,CIARTA,NFIL3,PER2,MAPK10,MAPK8A,PER1A,PER3,CIPCB,SCN1LAB
female	MEred	GO:BP	regulation of mRNA processing	GO:0050684	0.0108244	1.9656	62	769	11	21828	SAFB,HNRNPK,CIRBPA,TRA2A,PUF60A,PUF60B,SF3B4,MBNL2,SRPK1A,TRA2B,HNRPKL
female	MEred	GO:BP	regulation of mRNA metabolic process	GO:1903311	0.0142964	1.84477	129	769	16	21828	SAFB,HNRNPK,CIRBPA,FASTKD3,TRA2A,PUF60A,PUF60B,PUM1,DCP1B,SF3B4,RC3H2,CARHSP1,MBNL2,SRPK1A,TRA2B,HNRPKL
female	MEred	GO:BP	negative regulation of cellular biosynthetic process	GO:0031327	0.0170113	1.76926	418	769	33	21828	PER1B,CRY2,SI:CH211-132B12.7,PPHLN1,CIPCA,KDM1A,MBTD1,WWP2,SUDS3,NELFCD,NR2C1,FOXP2,EIF4EBP2,KAT7A,TLE2A,CBX7A,DCP1B,PER2,AGO4,NCOR1,TEN1,PER1A,RC3H2,PER3,IREB2,HDAC1,CTBP2A,LDB2B,NR1D4A,CIPCB,PURAA,SOX11A,SLC27A1A
female	MEred	GO:BP	negative regulation of biosynthetic process	GO:0009890	0.0178609	1.7481	419	769	33	21828	PER1B,CRY2,SI:CH211-132B12.7,PPHLN1,CIPCA,KDM1A,MBTD1,WWP2,SUDS3,NELFCD,NR2C1,FOXP2,EIF4EBP2,KAT7A,TLE2A,CBX7A,DCP1B,PER2,AGO4,NCOR1,TEN1,PER1A,RC3H2,PER3,IREB2,HDAC1,CTBP2A,LDB2B,NR1D4A,CIPCB,PURAA,SOX11A,SLC27A1A
female	MEred	GO:BP	establishment of localization in cell	GO:0051649	0.0197566	1.70429	1166	769	69	21828	ITPR2,BNIP3,ZDHHC24,RABGAP1L,MCOLN1A,RGP1,WDR35,SNAP91A,RAB21,TMEM50A,MAK,DOP1B,SI:CH211-200P22.4,TMED1B,SNX9B,PHAX,SI:DKEY-190G11.3,XPO4,PREB,PEX13,TBC1D23,CCDC88C,STON2,PICALMA,AP1G1,ARL4AB,DYNC1LI2,TMEM87B,SYK,MCTP1A,VPS26BL,CLTB,ARL4D,GGA1,DNM2A,ITPR1B,MYO1B,XPO1B,MYO16,COPA,ANKFN1,ARFIP2A,ARF2A,GRIP1,SCARB2A,ARFIP2B,KPNB1,ITPR1A,CLTCB,CPLX3B,NDFIP1L,ZDHHC18B,CADPS2,TPRB,STX12L,RIMS2A,SLC8A2A…
female	MEred	GO:BP	sterol biosynthetic process	GO:0016126	0.0205452	1.68729	25	769	7	21828	HMGCS1,TM7SF2,HSD17B7,FDFT1,HMGCRA,DHCR7,SQLEA
female	MEred	GO:BP	negative regulation of macromolecule biosynthetic process	GO:0010558	0.0224583	1.64862	405	769	32	21828	PER1B,CRY2,SI:CH211-132B12.7,PPHLN1,CIPCA,KDM1A,MBTD1,WWP2,SUDS3,NELFCD,NR2C1,FOXP2,EIF4EBP2,KAT7A,TLE2A,CBX7A,DCP1B,PER2,AGO4,NCOR1,TEN1,PER1A,RC3H2,PER3,IREB2,HDAC1,CTBP2A,LDB2B,NR1D4A,CIPCB,PURAA,SOX11A
female	MEred	GO:BP	secondary alcohol biosynthetic process	GO:1902653	0.0275068	1.56056	18	769	6	21828	HMGCS1,TM7SF2,HSD17B7,FDFT1,HMGCRA,DHCR7
female	MEred	GO:BP	cholesterol biosynthetic process	GO:0006695	0.0275068	1.56056	18	769	6	21828	HMGCS1,TM7SF2,HSD17B7,FDFT1,HMGCRA,DHCR7
female	MEred	GO:BP	cytoskeleton organization	GO:0007010	0.0353152	1.45204	946	769	58	21828	BRWD1,MAPRE3A,MINK1,CDK2AP2,DBN1,CAPZB,SMO,MAPRE1B,LIMK2,CHORDC1A,EPB41L5,MAP4L,FHOD1,KANK4,ELMO2,DYNC1LI2,MARK3B,ABLIM1B,SI:DKEY-40C11.2,ARHGEF10,BAIAP2A,CRMP1,PRC1A,EML1,MAP7D2B,RACGAP1,ARHGAP17B,MYO1B,MAP7D3,VIL1,MYO16,ANKFN1,ARFIP2A,PACSIN2,SPIRE1B,ABLIM2,EPB41A,TPM3,ARFIP2B,EPB41L3A,ZGC:86896,KIZ,ARHGEF2,TACC2,BRWD3,CLASP1A,CAMSAP1A,ABI2A,CEP57,RASSF7A,CAP1,CDC42EP2,KATNAL1,PDLIM5A,TLN2A,ZGC…
female	MEred	GO:BP	lamellipodium organization	GO:0097581	0.0390064	1.40886	19	769	6	21828	CAPZB,AKIRIN1,ABLIM1B,VIL1,ABLIM2,ROBO4
female	MEred	GO:BP	negative regulation of circadian rhythm	GO:0042754	0.0495015	1.30538	3	769	3	21828	SI:CH211-132B12.7,CIPCA,CIPCB
female	MEred	GO:CC	cytoplasm	GO:0005737	3.16064e-12	11.5002	6733	723	334	20566	EIF3C,HSP90AA1.2,PER1B,HNRNPABB,CRY2,SRSF5A,POLDIP2,AMD1,FKBP4,TPST1,HSPA4A,SERP2,MAPRE3A,HSPA5,CERS1,NAA40,HNRNPK,P4HA1A,ITPR2,LSM14AB,ARNTL1B,DDX17,MINK1,BNIP3,ANAPC16,PDIA6,HSP70.3,ODF2A,ST8SIA5,TSC1A,ATF4A,GDI2,CTNND2B,ZDHHC24,SERPINH1B,PLEKHA8,CNOT1,HERPUD1,MCOLN1A,CDK2AP2,VAPB,RGP1,TBCCD1,WDR35,SNAP91A,SI:DKEY-19E4.5,ZMPSTE24,USP10,WWP2,APBA2B,CAPZB,PRELID3A,RAB21,NSFL1C,HIGD1A,STXBP5A,RNF1…
female	MEred	GO:CC	membrane-bounded organelle	GO:0043227	7.26755e-10	9.13861	8346	723	384	20566	COPS2,KDM6BB,U2AF2B,HSP90AA1.2,PER1B,HNRNPABB,CRY2,SRSF5A,POLDIP2,SI:CH211-132B12.7,PPHLN1,CIPCA,TPST1,KAT5B,BRWD1,HSPA4A,SERP2,HSPA5,CERS1,HMGB3B,PSPC1,RBM17,NAA40,HNRNPK,PWP2H,CIRBPA,P4HA1A,ITPR2,SETB,HSF1,ARNTL1B,DDX17,BNIP3,TMPOA,ANAPC16,PDIA6,ING4,HSP70.3,TRA2A,CNOT7,ST8SIA5,TSC1A,ATF4A,CTNND2B,KDM1A,ZDHHC24,SERPINH1B,CNOT1,PHF6,HERPUD1,MBTD1,MCOLN1A,CDK2AP2,NFIL3,NCOA6,VAPB,RGP1,WDR35,SNAP9…
female	MEred	GO:CC	intracellular membrane-bounded organelle	GO:0043231	4.57436e-09	8.33967	8112	723	372	20566	COPS2,KDM6BB,U2AF2B,HSP90AA1.2,PER1B,HNRNPABB,CRY2,SRSF5A,POLDIP2,SI:CH211-132B12.7,PPHLN1,CIPCA,TPST1,KAT5B,BRWD1,HSPA4A,SERP2,HSPA5,CERS1,HMGB3B,PSPC1,RBM17,NAA40,HNRNPK,PWP2H,CIRBPA,P4HA1A,ITPR2,SETB,HSF1,ARNTL1B,DDX17,BNIP3,TMPOA,ANAPC16,PDIA6,ING4,HSP70.3,TRA2A,CNOT7,ST8SIA5,TSC1A,ATF4A,CTNND2B,KDM1A,ZDHHC24,SERPINH1B,CNOT1,PHF6,HERPUD1,MBTD1,MCOLN1A,CDK2AP2,NFIL3,NCOA6,VAPB,RGP1,SNAP91A,DNA…
female	MEred	GO:CC	endomembrane system	GO:0012505	8.59918e-08	7.06554	1799	723	114	20566	TPST1,SERP2,HSPA5,CERS1,P4HA1A,ITPR2,BNIP3,TMPOA,PDIA6,ST8SIA5,TSC1A,ZDHHC24,SERPINH1B,HERPUD1,MCOLN1A,VAPB,RGP1,SNAP91A,ZMPSTE24,APBA2B,RAB21,NSFL1C,B3GALNT2,DOP1B,STIMATE,DENND4C,CAV2,SI:CH211-200P22.4,SPCS2,TMED1B,HSP90B1,PREB,DNAJB12B,RAB30,TBC1D23,STON2,VLDLR,PICALMA,MVB12A,ST3GAL3B,AP1G1,TM7SF2,LFNG,TMEM87B,TOR1,RER1,ZGC:92744,MCTP1A,TMTC3,LZTR1,TMEM97,SULF1,GOLGA2,ATP9B,HTR4,CHPFA,GRAMD1BA…
female	MEred	GO:CC	organelle	GO:0043226	9.90785e-07	6.00402	10781	723	455	20566	COPS2,KDM6BB,U2AF2B,HSP90AA1.2,PER1B,HNRNPABB,CRY2,SRSF5A,POLDIP2,SI:CH211-132B12.7,PPHLN1,CIPCA,TPST1,KAT5B,BRWD1,HSPA4A,SERP2,MAPRE3A,HSPA5,CERS1,HMGB3B,PSPC1,RBM17,NAA40,HNRNPK,PWP2H,CIRBPA,P4HA1A,ITPR2,LSM14AB,SETB,HSF1,ARNTL1B,DDX17,BNIP3,TMPOA,ANAPC16,PDIA6,ING4,HSP70.3,TRA2A,ODF2A,CNOT7,ST8SIA5,TSC1A,ATF4A,CTNND2B,KDM1A,ZDHHC24,SERPINH1B,CNOT1,PHF6,HERPUD1,MBTD1,MCOLN1A,CDK2AP2,NFIL3,NCOA6…
female	MEred	GO:CC	intracellular anatomical structure	GO:0005622	1.01529e-06	5.99341	12687	723	519	20566	EIF3C,COPS2,KDM6BB,U2AF2B,HSP90AA1.2,PER1B,HNRNPABB,CRY2,SRSF5A,POLDIP2,SI:CH211-132B12.7,PPHLN1,CIPCA,AMD1,FKBP4,TPST1,KAT5B,BRWD1,HSPA4A,SERP2,MAPRE3A,HSPA5,CERS1,HMGB3B,PSPC1,RBM17,NAA40,HNRNPK,PWP2H,CIRBPA,P4HA1A,ITPR2,LSM14AB,SETB,HSF1,ARNTL1B,DDX17,MINK1,BNIP3,TMPOA,ANAPC16,PDIA6,ING4,HSP70.3,TRA2A,ODF2A,CNOT7,ST8SIA5,TSC1A,ATF4A,GDI2,CTNND2B,KDM1A,ZDHHC24,SERPINH1B,PLEKHA8,CNOT1,PHF6,HERPU…
female	MEred	GO:CC	intracellular organelle	GO:0043229	1.28614e-05	4.89071	10573	723	442	20566	COPS2,KDM6BB,U2AF2B,HSP90AA1.2,PER1B,HNRNPABB,CRY2,SRSF5A,POLDIP2,SI:CH211-132B12.7,PPHLN1,CIPCA,TPST1,KAT5B,BRWD1,HSPA4A,SERP2,MAPRE3A,HSPA5,CERS1,HMGB3B,PSPC1,RBM17,NAA40,HNRNPK,PWP2H,CIRBPA,P4HA1A,ITPR2,LSM14AB,SETB,HSF1,ARNTL1B,DDX17,BNIP3,TMPOA,ANAPC16,PDIA6,ING4,HSP70.3,TRA2A,ODF2A,CNOT7,ST8SIA5,TSC1A,ATF4A,CTNND2B,KDM1A,ZDHHC24,SERPINH1B,CNOT1,PHF6,HERPUD1,MBTD1,MCOLN1A,CDK2AP2,NFIL3,NCOA6…
female	MEred	GO:CC	Golgi apparatus	GO:0005794	0.00019773	3.70393	643	723	48	20566	TPST1,ST8SIA5,TSC1A,ZDHHC24,RGP1,RAB21,NSFL1C,B3GALNT2,DOP1B,CAV2,TMED1B,RAB30,TBC1D23,ST3GAL3B,AP1G1,LFNG,TMEM87B,RER1,LZTR1,SULF1,GOLGA2,ATP9B,CHPFA,CLTB,GGA1,NSFA,GNPTG,AARS2,COPA,ARHGAP32B,ARFIP2A,DNAJC28,SLC29A3,ARFIP2B,CLTCB,MAN2A2,RAB33BA,SGCE,ZDHHC18B,GBF1,SELENOI,CLASP1A,ARL1,QSOX2,TRAPPC5,ACBD3,ZGC:162952,CNSTA
female	MEred	GO:CC	endoplasmic reticulum	GO:0005783	0.00127546	2.89433	708	723	49	20566	SERP2,HSPA5,CERS1,P4HA1A,ITPR2,BNIP3,PDIA6,ZDHHC24,SERPINH1B,HERPUD1,VAPB,ZMPSTE24,RAB21,STIMATE,SPCS2,TMED1B,HSP90B1,PREB,DNAJB12B,TM7SF2,TOR1,RER1,ZGC:92744,TMTC3,TMEM97,SULF1,GRAMD1BA,KTN1,RCE1A,HSD17B7,DERL1,ITPR1B,FDFT1,GNPAT,HMGCRA,PNPLA7A,ITPR1A,ERN2,ELOVL2,ZDHHC18B,SOAT1,NSDHL,ACSL2,SELENOI,PORCNL,TRAPPC5,SEC31A,ACSL1A,SDF2
female	MEred	GO:CC	transcription regulator complex	GO:0005667	0.00335641	2.47412	240	723	23	20566	CRY2,ARNTL1B,NCOA6,YY1A,MED14,TLE2A,TCF12,MBD3B,TCF3A,SMAD1,GTF2H5,MAX,GTF2H4,LIN52,NFYA,CREB1A,TAF2,NR4A1,SMAD6B,LDB2B,PBX4,E2F3,TCF7
female	MEred	GO:CC	organelle subcompartment	GO:0031984	0.00457668	2.33945	560	723	40	20566	SERP2,ITPR2,HERPUD1,VAPB,ZMPSTE24,RAB21,NSFL1C,DOP1B,STIMATE,SPCS2,TMED1B,PREB,DNAJB12B,RAB30,TM7SF2,ZGC:92744,SULF1,GOLGA2,ATP9B,CHPFA,GRAMD1BA,KTN1,RCE1A,DERL1,ITPR1B,NSFA,FDFT1,HMGCRA,ARFIP2A,PNPLA7A,ARFIP2B,ITPR1A,ERN2,ELOVL2,GBF1,SOAT1,SELENOI,ARL1,SEC31A,CNSTA
female	MEred	GO:CC	organelle membrane	GO:0031090	0.0137921	1.86037	1375	723	76	20566	TPST1,SERP2,ITPR2,BNIP3,HERPUD1,MCOLN1A,VAPB,RGP1,ZMPSTE24,RAB21,B3GALNT2,DENND4C,CAV2,SPCS2,TMED1B,SNX9B,SI:DKEY-190G11.3,PREB,DNAJB12B,PEX13,MVB12A,AFG3L2,AP1G1,GPR137,TM7SF2,LFNG,RER1,ZGC:92744,MCTP1A,GOLGA2,CHPFA,BAXB,GRAMD1BA,KTN1,CLTB,RCE1A,GGA1,PDE6GB,DERL1,ITPR1B,FDFT1,GNPAT,ATG16L1,HMGCRA,AARS2,COPA,ARFIP2A,EPN3A,APOOL,PACSIN2,PNPLA7A,SLC29A3,VDAC3,ARFIP2B,ITPR1A,CLTCB,MAN2A2,ERN2,ELOVL2…
female	MEred	GO:CC	nucleus	GO:0005634	0.0162006	1.79047	5331	723	233	20566	COPS2,KDM6BB,U2AF2B,HSP90AA1.2,PER1B,HNRNPABB,CRY2,SRSF5A,POLDIP2,SI:CH211-132B12.7,PPHLN1,CIPCA,KAT5B,BRWD1,HSPA4A,HSPA5,HMGB3B,PSPC1,RBM17,NAA40,HNRNPK,PWP2H,CIRBPA,SETB,HSF1,ARNTL1B,DDX17,BNIP3,TMPOA,ANAPC16,ING4,HSP70.3,TRA2A,CNOT7,ATF4A,CTNND2B,KDM1A,CNOT1,PHF6,MBTD1,CDK2AP2,NFIL3,NCOA6,DNAJC8,DGCR8,USP10,YY1A,WWP2,PUF60A,MED24,NSFL1C,SUDS3,SWT1,GLI1,PBRM1L,MAK,ILF3B,EWSR1B,DNMT3AB,DEAF1,NEL…
female	MEred	GO:CC	nucleoplasm	GO:0005654	0.0247877	1.60576	543	723	37	20566	KDM6BB,U2AF2B,HNRNPABB,PPHLN1,KAT5B,PSPC1,RBM17,HNRNPK,ING4,NCOA6,SUDS3,RBBP5,MBD3B,DTX4B,POLR2M,KDM3B,ZMP:0000001236,NOLC1,BAIAP2A,GTF2H5,MAX,GTF2H4,MBNL2,TAF2,ARHGAP32B,ACOT7,HDAC1,TOP2A,AKIP1,KMT2BA,NEK11,HNRPKL,ZNHIT1,SSRP1A,HDAC5,ZGC:163143,WRN
female	MEred	GO:CC	cytoskeleton	GO:0005856	0.0308056	1.51137	1180	723	66	20566	MAPRE3A,ODF2A,CDK2AP2,TBCCD1,WDR35,CAPZB,MAPRE1B,BOD1,EPB41L5,ANK2B,MAP4L,KANK4,MBD3B,DYNC1LI2,ABLIM1B,SI:DKEY-40C11.2,ARHGEF10,BAIAP2A,PRC1A,ANK1A,VIMR2,DNM2A,EML1,ANAPC5,MAP7D2B,FRMD4A,MYO1B,MAP7D3,VIL1,CDK5RAP2,MYO16,DNM2B,ARHGAP32B,ANKFN1,PIBF1,KIF21A,TYK2,ABLIM2,EPB41A,BMF1,TPM3,FRMPD2,EPB41L3A,ZGC:86896,SGCE,KIZ,CEP76,ARHGEF2,TACC2,RIMS2A,SEPT5A,CLASP1A,NEK11,CAMSAP1A,ZGC:63587,ABI2A,SI:CH2…
female	MEred	GO:CC	presynapse	GO:0098793	0.0483275	1.31581	231	723	20	20566	SNAP91A,APBA2B,SI:CH211-200P22.4,STON2,PICALMA,MCTP1A,CLTB,DNM2A,BIN1B,CPLX3B,CADPS2,STX12L,RIMS2A,SEPT5A,ADGRL1A,GRIK4,GUCY1B1,ZGC:63587,SYT19,SLC6A2
female	MEred	KEGG	Steroid biosynthesis	KEGG:00100	0.0024574	2.60952	20	284	7	5305	HSD17B7,FDFT1,LSS,DHCR7,SOAT1,NSDHL,SQLEA
female	MEred	REAC	Cholesterol biosynthesis	REAC:R-DRE-191273	0.00805256	2.09407	20	345	7	7340	HMGCS1,TM7SF2,HSD17B7,FDFT1,HMGCRA,SQLEA,IDI1
female	MEred	REAC	Cellular response to heat stress	REAC:R-DRE-3371556	0.0378959	1.42141	82	345	13	7340	FKBP4,HIKESHI,HSPA4A,HSPA5,DNAJB1A,HSPA13,HSP70.3,RPTOR,CAMK2B1,HDAC6,AKT1S1,TPRB,NUP188
female	MEred	HP	Intellectual disability	HP:0001249	0.00348944	2.45724	2090	241	133	5148	HMGB3A,JARID2A,JARID2B,CERS1,HMGB3B,HNRNPK,SETB,SLC1A2B,KCTD7,CHD4A,CNOT1,PHF6,TMEM237B,PTCH2,MCOLN1A,DGCR8,YY1A,PUF60A,SMO,FGFR2,GLI1,B3GALNT2,LDHD,MAK,ZNF148,DNMT3AB,DIS3L2,DEAF1,SLC4A4A,AIMP1A,SLC9A6A,SMS,GP1BB,SGSH,PUF60B,PPM1DA,PIGV,EIF4H,PUM1,MRPS2,CCDC88C,AKT3A,GABRB1,VLDLR,CACNA1C,PRRT2,CACNA1DA,ELMO2,CUL4B,AFG3L2,ST3GAL3B,DPYSL5B,UBE4A,KDM3B,MAPK10,SHANK3A,SNAP29,RSPRY1,BSCL2,LFNG,TOR1,T…
female	MEturquoise	GO:MF	binding	GO:0005488	3.08623e-08	7.51057	16633	1278	970	24485	EIF3C,HNRNPA3,CRY3A,HNRNPH1,SRSF6B,SRSF11,RBM4.1,TCF3B,TRA2A,KDM5BB,MKRN1,EPB41L5,PLXNB1B,PCLOA,BBS4,SEC63,CRY3B,OPA1,LONP1,MYEF2,ARNTL1A,GRA,SFPQ,MAPTB,PRKAG3A,USP49,SF1,F3A,RBPJA,SI:CH73-212J7.1,YY1B,NFYAL,TRA2B,GNAI2B,SRSF6A,ZFAND5B,SGPL1,TGM1L1,TEFA,EIF1,TRIM33,MBD3B,PRKAG2A,SI:DKEY-151G10.3,RNF220A,TSNAX,RBMX,ADCY7,SI:CH211-203D1.3,RXRBA,CDKN1BB,HGS,SIRT1,EHBP1L1B,PUF60A,PFN2L,ZMIZ2,TNS1A,GM…
female	MEturquoise	GO:MF	protein binding	GO:0005515	4.721e-07	6.32597	7839	1278	508	24485	EIF3C,TCF3B,EPB41L5,PLXNB1B,PCLOA,BBS4,ARNTL1A,GRA,MAPTB,PRKAG3A,F3A,SI:CH73-212J7.1,GNAI2B,TRIM33,MBD3B,PRKAG2A,SI:CH211-203D1.3,CDKN1BB,HGS,SIRT1,EHBP1L1B,PFN2L,TNS1A,FBXO7,S100B,CIAO1,DNAJB6A,SYNE3,WASLA,ZBTB8A,ANKRD37,DRAP1,TTC26,UBAP2L,OAT,SVILA,UVRAG,ARNTL1B,ARAF,LMO7B,TNNT2D,ASB2B,KCNC2,H3F3D,SPRYD3,CCT2,SCOSPONDIN,UBL7B,UBALD1A,DENND4C,TAF5,TXNDC15,PREX1,PPM1DB,ANKRD13C,CASKA,NUB1,POLRMT,…
female	MEturquoise	GO:MF	mRNA binding	GO:0003729	4.94559e-06	5.30578	199	1278	32	24485	SRSF6B,MYEF2,SRSF6A,CHTOPA,G3BP1,CELF3B,PTBP1A,KHDRBS1A,SERBP1A,HNRNPM,IGF2BP2A,RBM4.3,CELF5A,LUC7L,ELAVL1B,YTHDF1,ZGC:158803,CSTF2,SHMT2,RPS5,HNRNPR,CNBPB,EIF2S2,CPEB1A,PTBP3,RBM15B,ZGC:77262,CASC3,FXR1,DCP1A,SRSF4,HNRNPA0B
female	MEturquoise	GO:MF	cytoskeletal protein binding	GO:0008092	8.91203e-05	4.05002	779	1278	75	24485	EPB41L5,MAPTB,MBD3B,SI:CH211-203D1.3,PFN2L,SYNE3,WASLA,SVILA,TNNT2D,MAPK8IP3,ADD2,SSH1A,MYH11A,GAS8,DCTN1A,SPTAN1,KIF1AB,EPB41L3B,LIMCH1A,ACTN4,DBNLA,PHACTR1,CLIP2,IFT74,DNM1A,MAPTA,MTSS1LB,SI:DKEY-26I13.8,DNM2A,SVILD,KIF14,REEP1,FRG1,SI:CH73-362M14.4,KIF5AA,COTL1,ABLIM1A,GSNA,MYO15AB,ZGC:162200,EPB41L3A,DBN1,SHROOM2B,VCLA,ARPC5A,RAI14,SI:DKEY-96L17.6,JAKMIP1,PDLIM1,FSCN1B,TWF1A,TPGS1,MAP6A,PLECB…
female	MEturquoise	GO:MF	RNA binding	GO:0003723	0.000782357	3.1066	1459	1278	117	24485	EIF3C,HNRNPA3,HNRNPH1,SRSF6B,SRSF11,TRA2A,SEC63,MYEF2,SFPQ,SF1,TRA2B,SRSF6A,EIF1,RBMX,PUF60A,EEF1DB,NCBP2,CHTOPA,CPSF6,CELF3A,G3BP1,CELF3B,SRSF1A,PTBP1A,U2AF1,MRM3A,RPS3,KHDRBS1A,TIAL1,SERBP1A,CIRBPA,EIF5A2,HNRNPM,IGF2BP2A,DDX3XB,RBM7,TDRD3,EIF2B2,EIF4H,NOP56,RPS10,RPL6,GFM1,EIF3F,ENOX2,EIF4E2RS1,RBM4.3,FASTKD1,EIF4A1B,CELF5A,GRSF1,RPL15,LUC7L,SRSF10B,ELAVL1B,RPL23A,EIF3K,EIF3HA,MEX3B,HNRNPH3,YTH…
female	MEturquoise	GO:MF	translation initiation factor binding	GO:0031369	0.00168388	2.77369	15	1278	7	24485	EIF3C,GRA,EIF3F,POLR2D,EIF5,EIF2S2,EIF3BA
female	MEturquoise	GO:MF	transcription coregulator activity	GO:0003712	0.00411527	2.3856	280	1278	33	24485	SS18,MED20,CITED4B,SIRT1,ZMIZ2,NCOA6,MTA3,AKIRIN2,SUPT7L,KDM2BA,MED8,MTA2,KCTD1,TAF5L,TLE2A,IRF2BPL,NAB1B,TAF15,TADA1,KAT7A,PPARGC1A,SCAI,SMARCD1,DYRK1AA,DYRK1B,CTBP2A,ZGC:158376,TAF6L,ZNF653,WWTR1,SIRT7,LDB1A,JMY
female	MEturquoise	GO:MF	actin binding	GO:0003779	0.00627155	2.20263	471	1278	47	24485	MBD3B,SI:CH211-203D1.3,PFN2L,WASLA,SVILA,ADD2,SSH1A,MYH11A,SPTAN1,EPB41L3B,LIMCH1A,ACTN4,DBNLA,PHACTR1,MTSS1LB,SVILD,FRG1,SI:CH73-362M14.4,COTL1,ABLIM1A,GSNA,MYO15AB,EPB41L3A,DBN1,SHROOM2B,VCLA,ARPC5A,RAI14,PDLIM1,FSCN1B,TWF1A,PLECB,EPB41A,MICAL2B,EPS8L3B,SCINLA,PHACTR4B,FMNL3,AVIL,MYO5AB,ADD1,ARPC5LB,AIF1L,CTNNA1,LSP1B,SPIRE1A,PARVAA
female	MEturquoise	GO:MF	translation regulator activity	GO:0045182	0.00776064	2.1101	134	1278	20	24485	EIF3C,EIF1,EEF1DB,EIF5A2,EIF2B2,GFM1,EIF3F,EIF4E2RS1,EIF4A1B,EIF3K,EIF3HA,SHMT2,CNBPB,EIF5,EIF2S2,CPEB1A,FXR1,EEF1A1B,EIF3BA,ETF1A
female	MEturquoise	GO:MF	GTPase regulator activity	GO:0030695	0.013006	1.88586	457	1278	45	24485	RAB3GAP1,EEF1DB,FGD5A,DENND4C,PREX1,ARHGAP29A,ALS2A,DOCK5,DENND10,DOCK3,ASAP1A,EIF2B2,DOCK10,AGFG1A,SMCR8A,ARHGEF10LB,TBC1D4,ZGC:63863,STARD13A,MCF2LA,ZMP:0000000660,TIAM1B,DAB2IPA,RALGAPA2,RASAL2,AGFG1B,PLEKHG5A,EIF5,ARHGEF4,SYNGAP1A,IQSEC2B,ARFGAP3,RIC1,RAPGEF1A,ALS2B,VAV3B,STARD8,RAPGEFL1,TBC1D14,RGL3A,RALGPS2,DOCK9B,RUNDC1,CHN1,ASAP3
female	MEturquoise	GO:MF	nucleoside-triphosphatase regulator activity	GO:0060589	0.013006	1.88586	457	1278	45	24485	RAB3GAP1,EEF1DB,FGD5A,DENND4C,PREX1,ARHGAP29A,ALS2A,DOCK5,DENND10,DOCK3,ASAP1A,EIF2B2,DOCK10,AGFG1A,SMCR8A,ARHGEF10LB,TBC1D4,ZGC:63863,STARD13A,MCF2LA,ZMP:0000000660,TIAM1B,DAB2IPA,RALGAPA2,RASAL2,AGFG1B,PLEKHG5A,EIF5,ARHGEF4,SYNGAP1A,IQSEC2B,ARFGAP3,RIC1,RAPGEF1A,ALS2B,VAV3B,STARD8,RAPGEFL1,TBC1D14,RGL3A,RALGPS2,DOCK9B,RUNDC1,CHN1,ASAP3
female	MEturquoise	GO:MF	translation regulator activity, nucleic acid binding	GO:0090079	0.0146723	1.8335	118	1278	18	24485	EIF3C,EIF1,EEF1DB,EIF5A2,EIF2B2,GFM1,EIF3F,EIF4E2RS1,EIF4A1B,EIF3K,EIF3HA,SHMT2,EIF5,EIF2S2,CPEB1A,EEF1A1B,EIF3BA,ETF1A
female	MEturquoise	GO:MF	translation factor activity, RNA binding	GO:0008135	0.0284314	1.5462	113	1278	17	24485	EIF3C,EIF1,EEF1DB,EIF5A2,EIF2B2,GFM1,EIF3F,EIF4E2RS1,EIF4A1B,EIF3K,EIF3HA,EIF5,EIF2S2,CPEB1A,EEF1A1B,EIF3BA,ETF1A
female	MEturquoise	GO:MF	purine-rich negative regulatory element binding	GO:0032422	0.0371558	1.42997	6	1278	4	24485	PURBA,PURBB,PURAB,PURG
female	MEturquoise	GO:BP	organelle organization	GO:0006996	3.12983e-05	4.50448	2126	1184	173	21828	KDM5BB,EPB41L5,OPA1,LONP1,MAPTB,SI:CH211-203D1.3,EHBP1L1B,PFN2L,WASLA,PCM1,UNC13A,SVILA,UVRAG,MINK1,SUPT16H,TNNT2D,ASB2B,PAX2A,NIPBLB,SPRYD3,TMEM11,TMED7,ADD2,EXOC5,RAB7A,TFG,ERBB2,VAPB,SQSTM1,ATL1,SSH1A,ARPIN,SEC24B,RPL6,CHCHD4A,CHCHD2,ANKRD39,ARID1AA,CCDC65,MAP7D1B,NDUFAF3,MARK3B,JAK2B,CENPK,ATG14,DRC1,DCTN1A,SPTAN1,VPS72A,EPB41L3B,ARHGEF10LB,LIMCH1A,NIN,CHMP1A,DNAJC11A,DBNLA,PHACTR1,GNA12A,CLI…
female	MEturquoise	GO:BP	negative regulation of signal transduction	GO:0009968	0.000115611	3.937	342	1184	44	21828	PTBP1A,ARAF,ATL1,SPARTB,SH3BP4,TP53BP2A,TPBGL,SOX4A,PPM1NB,NUMBL,TLE2A,LDLRAD4A,AXIN1,DUSP8A,KICS2,ZGC:171740,SNX25,DLK2,DAB2IPA,SI:DKEY-88E18.8,SPRED3,SFRP2L,SMURF1,SKIB,RGS7B,NOG2,INSIG2,AKAP12B,PLRG1,BAMBIA,DUSP7,SOCS7,LDLRAD4B,PHACTR4B,PPM1BB,PRPF19,DKK1B,FAIMA,WWTR1,EYA2,OTUD7B,SPRY4,SPRY2,SESN2
female	MEturquoise	GO:BP	regulation of RNA splicing	GO:0043484	0.000165395	3.78148	78	1184	18	21828	HNRNPH1,TRA2A,TRA2B,PUF60A,RBM5,CELF3B,PTBP1A,KHDRBS1A,CIRBPA,RBM7,CELF5A,GRSF1,HNRNPH3,MBNL2,PTBP3,ZC3H10,RBM15B,FXR1
female	MEturquoise	GO:BP	multicellular organism development	GO:0007275	0.000187124	3.72787	3296	1184	243	21828	EPB41L5,PLXNB1B,SEC63,MYEF2,ARNTL1A,SLC2A1B,SFPQ,MAPTB,RBPJA,MBD3B,DTWD2,SIRT1,ZMIZ2,TNS1A,DNAJB6A,CHD2,WASLA,UNC13A,SLC22A2,PTBP1A,MINK1,ARAF,LMO7B,CNOT3A,MAP3K7,ASB2B,PAX2A,PTENB,SCOSPONDIN,ARHGAP29A,RPS3,TAOK2B,MTA3,TGIF1,MAPK8IP3,EXOC5,USP40,ERBB2,CRTAC1A,MAFF,LAMC3,PLOD2,IGF2BP2A,POU4F1,DDX3XB,SQSTM1,RBM7,ATL1,PTPRSB,STAT5B,ASXL1,NYAP2A,NOP56,DAGLA,RPL6,SOX1B,MIBP2,PAICS,ATP1B2B,PRDM8B,FZD8A…
female	MEturquoise	GO:BP	negative regulation of cell communication	GO:0010648	0.000193251	3.71388	360	1184	45	21828	PTBP1A,ARAF,DRD3,ATL1,SPARTB,SH3BP4,TP53BP2A,TPBGL,SOX4A,PPM1NB,NUMBL,TLE2A,LDLRAD4A,AXIN1,DUSP8A,KICS2,ZGC:171740,SNX25,DLK2,DAB2IPA,SI:DKEY-88E18.8,SPRED3,SFRP2L,SMURF1,SKIB,RGS7B,NOG2,INSIG2,AKAP12B,PLRG1,BAMBIA,DUSP7,SOCS7,LDLRAD4B,PHACTR4B,PPM1BB,PRPF19,DKK1B,FAIMA,WWTR1,EYA2,OTUD7B,SPRY4,SPRY2,SESN2
female	MEturquoise	GO:BP	negative regulation of signaling	GO:0023057	0.000193251	3.71388	360	1184	45	21828	PTBP1A,ARAF,DRD3,ATL1,SPARTB,SH3BP4,TP53BP2A,TPBGL,SOX4A,PPM1NB,NUMBL,TLE2A,LDLRAD4A,AXIN1,DUSP8A,KICS2,ZGC:171740,SNX25,DLK2,DAB2IPA,SI:DKEY-88E18.8,SPRED3,SFRP2L,SMURF1,SKIB,RGS7B,NOG2,INSIG2,AKAP12B,PLRG1,BAMBIA,DUSP7,SOCS7,LDLRAD4B,PHACTR4B,PPM1BB,PRPF19,DKK1B,FAIMA,WWTR1,EYA2,OTUD7B,SPRY4,SPRY2,SESN2
female	MEturquoise	GO:BP	alternative mRNA splicing, via spliceosome	GO:0000380	0.000421178	3.37553	44	1184	13	21828	SRSF6B,PUF60A,RBM5,CELF3B,KHDRBS1A,HNRNPM,RBM7,CELF5A,MBNL2,ZC3H10,RBM15B,FXR1,SRSF4
female	MEturquoise	GO:BP	regulation of mRNA metabolic process	GO:1903311	0.000500653	3.30046	129	1184	23	21828	TRA2A,MYEF2,TRA2B,PUF60A,RBM5,CELF3B,CNOT3A,KHDRBS1A,CIRBPA,HNRNPM,RBM7,SAFB,POLR2D,FASTKD1,CELF5A,YTHDF1,MBNL2,ZC3H10,RBM15B,PATL1,FXR1,DCP1A,FASTKD2
female	MEturquoise	GO:BP	cytoskeleton organization	GO:0007010	0.000599681	3.22208	946	1184	88	21828	EPB41L5,MAPTB,SI:CH211-203D1.3,EHBP1L1B,PFN2L,WASLA,PCM1,SVILA,MINK1,TNNT2D,ASB2B,SPRYD3,ADD2,ERBB2,SSH1A,ARPIN,CCDC65,MAP7D1B,MARK3B,DRC1,DCTN1A,SPTAN1,EPB41L3B,ARHGEF10LB,LIMCH1A,NIN,DBNLA,PHACTR1,GNA12A,CLIP2,SLAIN1A,PHLDB2B,TACC2,SVILD,STARD13A,KIZ,ANLN,SI:CH73-362M14.4,SORBS2A,COTL1,MEF2CA,ABLIM1A,MAP7D2A,AP1AR,GSNA,MYO15AB,ZGC:162200,RAC3B,EPB41L3A,DBN1,VCLA,ZGC:113162,ARPC5A,IQSEC2B,NPM1A,…
female	MEturquoise	GO:BP	amide biosynthetic process	GO:0043604	0.000844091	3.07361	570	1184	60	21828	EIF3C,GRA,EIF1,EEF1DB,CNOT3A,GARS1,RPS3,WARS2,EIF5A2,RPL18A,EIF2B2,EIF4H,PRR16,RPL6,GFM1,RPL31,EIF3F,SMPD2A,EIF4E2RS1,RARS2,POLR2D,EIF4A1B,B4GALT3,CERS6,MRPL15,RPL15,CERS2A,CNOT1,RPL23A,EIF3K,YTHDF1,PARS2,ELOVL7A,LARP6A,SPTLC2A,RMND1,SHMT2,RPS12,RPP30,RPS5,CNBPB,EIF5,EIF2S2,DARS2,NARS2,CERS2B,MRPL16,CPEB1A,PDHA1A,RPS23,ACACB,ELOVL5,FTSJ1,PATL1,FXR1,DCP1A,MRRF,EEF1A1B,EIF3BA,ETF1A
female	MEturquoise	GO:BP	positive regulation of RNA metabolic process	GO:0051254	0.000907425	3.04219	532	1184	57	21828	SS18,TRA2A,ARNTL1A,CITED4B,RBPJA,TRA2B,TEFA,GMEB2,CNOT3A,SUPT16H,NCOA6,BICRAL,MTA3,CIRBPA,MAFF,AKIRIN2,ASXL1,DDIT3,CHCHD2,SUPT7L,MTA2,SRFB,ZNF318,EAF1,TAF5L,POLR2D,SOX4A,ZGC:66474,YTHDF1,HMBOX1A,TADA1,KAT7A,MEF2CA,ZNF131,SI:DKEY-31C13.1,RREB1B,CDK12,DYRK1AA,DYRK1B,BICRA,TFE3B,ARNT2,TAF6L,NPM1A,ATF6,SSBP3B,NFYC,PATL1,MICAL2B,MEF2AA,DCP1A,TFEB,RNF6,WWTR1,SOX18,GABPB2B,JMY
female	MEturquoise	GO:BP	cellular component organization or biogenesis	GO:0071840	0.00097325	3.01178	4176	1184	292	21828	SRSF6B,KDM5BB,NOB1,EPB41L5,PLXNB1B,OPA1,LONP1,ECPAS,SFPQ,MAPTB,GABRG2,CLDN19,SI:CH211-203D1.3,CLASP2,EHBP1L1B,PUF60A,PFN2L,CIAO1,WASLA,CELF3B,PES,PCM1,UNC13A,SVILA,UVRAG,MINK1,SUPT16H,YBEY,TNNT2D,ASB2B,KCNC2,PAX2A,NIPBLB,SPRYD3,SART1,ERC1A,PYM1,TAOK2B,TMEM11,TMED7,MAPK8IP3,ADD2,EIF5A2,EXOC5,RAB7A,TFG,ERBB2,CRTAC1A,LAMC3,CACNA1DA,PLOD2,VAPB,SQSTM1,RBM7,ATL1,PTPRSB,SSH1A,ARPIN,EIF4H,SEC24B,NYAP2A,N…
female	MEturquoise	GO:BP	cellular process	GO:0009987	0.00117357	2.93049	19000	1184	1082	21828	EIF3C,SS18,CRY3A,HNRNPH1,SRSF6B,SRSF11,TCF3B,TRA2A,KDM5BB,NOB1,EPB41L5,PLXNB1B,KAT5B,SEC63,GTF2A1,CRY3B,OPA1,LONP1,MYEF2,ARNTL1A,GRA,ECPAS,ZGC:101540,MED20,SLC2A1B,CITED4B,SFPQ,MAPTB,PRKAG3A,USP49,SF1,PTPN12,OTUD5A,F3A,RBPJA,TTLL5,YY1B,NFYAL,TRA2B,GINS2,GNAI2B,BAP1,PELI3,SGPL1,TGM1L1,TEFA,TRIR,EIF1,GABRG2,MBD3B,CLDN19,PRKAG2A,SI:DKEY-151G10.3,DTWD2,RNF220A,ZGC:85858,ADCY7,SI:CH211-203D1.3,RXRBA,C…
female	MEturquoise	GO:BP	positive regulation of macromolecule biosynthetic process	GO:0010557	0.00130517	2.88433	512	1184	55	21828	SS18,ARNTL1A,CITED4B,RBPJA,TEFA,GMEB2,SUPT16H,NCOA6,BICRAL,MTA3,EIF5A2,MAFF,AKIRIN2,ASXL1,DDIT3,PRR16,CHCHD2,SUPT7L,MTA2,SRFB,ZNF318,EAF1,TAF5L,POLR2D,SOX4A,ZGC:66474,HMBOX1A,TADA1,KAT7A,MEF2CA,RMND1,ZNF131,SI:DKEY-31C13.1,RREB1B,CNBPB,CDK12,DYRK1AA,DYRK1B,BICRA,TFE3B,ARNT2,TAF6L,NPM1A,ATF6,SSBP3B,NFYC,MICAL2B,FXR1,MEF2AA,TFEB,RNF6,WWTR1,SOX18,GABPB2B,JMY
female	MEturquoise	GO:BP	regulation of mRNA splicing, via spliceosome	GO:0048024	0.00165345	2.78161	49	1184	13	21828	TRA2A,TRA2B,PUF60A,RBM5,CELF3B,KHDRBS1A,CIRBPA,RBM7,CELF5A,MBNL2,ZC3H10,RBM15B,FXR1
female	MEturquoise	GO:BP	positive regulation of nucleobase-containing compound metabolic process	GO:0045935	0.00170348	2.76866	569	1184	59	21828	SS18,TRA2A,ARNTL1A,CITED4B,RBPJA,TRA2B,TEFA,GMEB2,CNOT3A,SUPT16H,NCOA6,BICRAL,MTA3,CIRBPA,MAFF,AKIRIN2,ASXL1,DDIT3,CHCHD2,ANKRD39,SUPT7L,MTA2,SRFB,ZNF318,EAF1,TAF5L,POLR2D,SOX4A,ZGC:66474,YTHDF1,HMBOX1A,TADA1,KAT7A,MEF2CA,ZNF131,SI:DKEY-31C13.1,RREB1B,CDK12,DYRK1AA,DYRK1B,BICRA,TFE3B,ARNT2,TAF6L,NPM1A,ATF6,SSBP3B,NFYC,PATL1,MICAL2B,MEF2AA,DCP1A,TFEB,RNF6,WWTR1,EYA2,SOX18,GABPB2B,JMY
female	MEturquoise	GO:BP	system development	GO:0048731	0.00226048	2.6458	3040	1184	221	21828	EPB41L5,PLXNB1B,SEC63,MYEF2,ARNTL1A,SLC2A1B,SFPQ,MAPTB,RBPJA,MBD3B,SIRT1,TNS1A,DNAJB6A,WASLA,UNC13A,SLC22A2,MINK1,ARAF,LMO7B,CNOT3A,MAP3K7,ASB2B,PAX2A,PTENB,SCOSPONDIN,ARHGAP29A,RPS3,TAOK2B,MTA3,TGIF1,MAPK8IP3,EXOC5,USP40,ERBB2,CRTAC1A,LAMC3,PLOD2,IGF2BP2A,POU4F1,DDX3XB,SQSTM1,RBM7,ATL1,PTPRSB,STAT5B,ASXL1,NYAP2A,NOP56,DAGLA,RPL6,SOX1B,MIBP2,PAICS,ATP1B2B,PRDM8B,FZD8A,MYH11A,BTBD9,JAK2B,DCTN1A,SP…
female	MEturquoise	GO:BP	developmental process	GO:0032502	0.00256457	2.59098	4172	1184	289	21828	TCF3B,EPB41L5,PLXNB1B,SEC63,MYEF2,ARNTL1A,SLC2A1B,CITED4B,SFPQ,MAPTB,RBPJA,MBD3B,DTWD2,SI:CH211-203D1.3,SIRT1,ZMIZ2,TNS1A,DNAJB6A,CHD2,WASLA,UNC13A,SLC22A2,UVRAG,PTBP1A,MINK1,ARAF,LMO7B,CNOT3A,MAP3K7,TNNT2D,ASB2B,PAX2A,PTENB,CCT2,SCOSPONDIN,ARHGAP29A,RPS3,TAOK2B,MTA3,TGIF1,MAPK8IP3,EXOC5,USP40,ERBB2,CRTAC1A,MAFF,LAMC3,RASD4,PLOD2,IGF2BP2A,POU4F1,DDX3XB,SQSTM1,RBM7,ATL1,PTPRSB,SSH1A,STAT5B,ASXL1,N…
female	MEturquoise	GO:BP	actin cytoskeleton organization	GO:0030036	0.00256583	2.59077	563	1184	58	21828	EPB41L5,SI:CH211-203D1.3,EHBP1L1B,PFN2L,WASLA,SVILA,MINK1,TNNT2D,ASB2B,ADD2,ERBB2,SSH1A,ARPIN,SPTAN1,EPB41L3B,ARHGEF10LB,LIMCH1A,DBNLA,PHACTR1,GNA12A,SVILD,STARD13A,ANLN,SI:CH73-362M14.4,SORBS2A,COTL1,MEF2CA,AP1AR,GSNA,MYO15AB,RAC3B,EPB41L3A,DBN1,VCLA,ZGC:113162,ARPC5A,IQSEC2B,PDLIM1,FSCN1B,TWF1A,PLECB,EPB41A,MICAL2B,MEF2AA,SCINLA,PHACTR4B,FMNL3,STARD8,AVIL,ADD1,LIMK1A,ARPC5LB,LIMK1B,AIF1L,JMY,CT…
female	MEturquoise	GO:BP	positive regulation of cellular process	GO:0048522	0.00262105	2.58152	1727	1184	138	21828	SS18,TRA2A,EPB41L5,PLXNB1B,ARNTL1A,CITED4B,RBPJA,TRA2B,TEFA,SI:DKEY-151G10.3,PFN2L,GMEB2,S100B,CAB39L1,WASLA,PTBP1A,CNOT3A,SUPT16H,MAP3K7,NCOA6,RPS3,BICRAL,MTA3,CIRBPA,MAPK8IP3,EIF5A2,ERBB2,MAFF,AKIRIN2,ASXL1,DDIT3,PRR16,CDK2,CHCHD2,ANKRD39,SUPT7L,AKAP12A,MTA2,SGTA,JAK2B,SRFB,ZNF318,ATG14,EAF1,TAF5L,ARHGEF10LB,POLR2D,DBNLA,FGF24,SOX4A,PPM1NB,NUMBL,COMMD1,SLAIN1A,ZGC:66474,CDK5R2A,IL11RA,DCUN1D3,P…
female	MEturquoise	GO:BP	cellular component organization	GO:0016043	0.00347775	2.4587	4019	1184	279	21828	SRSF6B,KDM5BB,EPB41L5,PLXNB1B,OPA1,LONP1,ECPAS,SFPQ,MAPTB,GABRG2,CLDN19,SI:CH211-203D1.3,CLASP2,EHBP1L1B,PUF60A,PFN2L,CIAO1,WASLA,CELF3B,PCM1,UNC13A,SVILA,UVRAG,MINK1,SUPT16H,TNNT2D,ASB2B,KCNC2,PAX2A,NIPBLB,SPRYD3,ERC1A,PYM1,TAOK2B,TMEM11,TMED7,MAPK8IP3,ADD2,EIF5A2,EXOC5,RAB7A,TFG,ERBB2,CRTAC1A,LAMC3,CACNA1DA,PLOD2,VAPB,SQSTM1,RBM7,ATL1,PTPRSB,SSH1A,ARPIN,EIF4H,SEC24B,NYAP2A,SNRPC,PRR16,DAGLA,RPL…
female	MEturquoise	GO:BP	actin filament-based process	GO:0030029	0.00350127	2.45577	582	1184	59	21828	EPB41L5,SI:CH211-203D1.3,EHBP1L1B,PFN2L,WASLA,SVILA,MINK1,TNNT2D,ASB2B,ADD2,ERBB2,SSH1A,ARPIN,SPTAN1,EPB41L3B,ARHGEF10LB,LIMCH1A,DBNLA,PHACTR1,GNA12A,SVILD,STARD13A,ANLN,SI:CH73-362M14.4,SORBS2A,COTL1,MEF2CA,AP1AR,GSNA,MYO15AB,RAC3B,EPB41L3A,DBN1,VCLA,ZGC:113162,ARPC5A,IQSEC2B,PDLIM1,FSCN1B,TWF1A,PLECB,EPB41A,MICAL2B,MEF2AA,SCINLA,PHACTR4B,FMNL3,STARD8,AVIL,ADD1,LIMK1A,ARPC5LB,LIMK1B,SCN4BA,AIF1L…
female	MEturquoise	GO:BP	anatomical structure development	GO:0048856	0.0038517	2.41435	3890	1184	271	21828	EPB41L5,PLXNB1B,SEC63,MYEF2,ARNTL1A,SLC2A1B,CITED4B,SFPQ,MAPTB,RBPJA,MBD3B,DTWD2,SIRT1,ZMIZ2,TNS1A,DNAJB6A,CHD2,WASLA,UNC13A,SLC22A2,PTBP1A,MINK1,ARAF,LMO7B,CNOT3A,MAP3K7,TNNT2D,ASB2B,PAX2A,PTENB,CCT2,SCOSPONDIN,ARHGAP29A,RPS3,TAOK2B,MTA3,TGIF1,MAPK8IP3,EXOC5,USP40,ERBB2,CRTAC1A,MAFF,LAMC3,RASD4,PLOD2,IGF2BP2A,POU4F1,DDX3XB,SQSTM1,RBM7,ATL1,PTPRSB,STAT5B,ASXL1,NYAP2A,NOP56,ARID2,RPS10,DAGLA,RPL6,…
female	MEturquoise	GO:BP	positive regulation of cellular biosynthetic process	GO:0031328	0.00398265	2.39983	531	1184	55	21828	SS18,ARNTL1A,CITED4B,RBPJA,TEFA,GMEB2,SUPT16H,NCOA6,BICRAL,MTA3,EIF5A2,MAFF,AKIRIN2,ASXL1,DDIT3,PRR16,CHCHD2,SUPT7L,MTA2,SRFB,ZNF318,EAF1,TAF5L,POLR2D,SOX4A,ZGC:66474,HMBOX1A,TADA1,KAT7A,MEF2CA,RMND1,ZNF131,SI:DKEY-31C13.1,RREB1B,CNBPB,CDK12,DYRK1AA,DYRK1B,BICRA,TFE3B,ARNT2,TAF6L,NPM1A,ATF6,SSBP3B,NFYC,MICAL2B,FXR1,MEF2AA,TFEB,RNF6,WWTR1,SOX18,GABPB2B,JMY
female	MEturquoise	GO:BP	positive regulation of biosynthetic process	GO:0009891	0.00471519	2.3265	534	1184	55	21828	SS18,ARNTL1A,CITED4B,RBPJA,TEFA,GMEB2,SUPT16H,NCOA6,BICRAL,MTA3,EIF5A2,MAFF,AKIRIN2,ASXL1,DDIT3,PRR16,CHCHD2,SUPT7L,MTA2,SRFB,ZNF318,EAF1,TAF5L,POLR2D,SOX4A,ZGC:66474,HMBOX1A,TADA1,KAT7A,MEF2CA,RMND1,ZNF131,SI:DKEY-31C13.1,RREB1B,CNBPB,CDK12,DYRK1AA,DYRK1B,BICRA,TFE3B,ARNT2,TAF6L,NPM1A,ATF6,SSBP3B,NFYC,MICAL2B,FXR1,MEF2AA,TFEB,RNF6,WWTR1,SOX18,GABPB2B,JMY
female	MEturquoise	GO:BP	regulation of mRNA processing	GO:0050684	0.00528849	2.27667	62	1184	14	21828	TRA2A,TRA2B,PUF60A,RBM5,CELF3B,KHDRBS1A,CIRBPA,RBM7,SAFB,CELF5A,MBNL2,ZC3H10,RBM15B,FXR1
female	MEturquoise	GO:BP	positive regulation of nitrogen compound metabolic process	GO:0051173	0.00553068	2.25722	869	1184	79	21828	SS18,TRA2A,ARNTL1A,CITED4B,RBPJA,TRA2B,TEFA,GMEB2,CAB39L1,CNOT3A,SUPT16H,NCOA6,BICRAL,MTA3,CIRBPA,EIF5A2,MAFF,AKIRIN2,ASXL1,DDIT3,PRR16,CHCHD2,ANKRD39,SUPT7L,MTA2,SRFB,ZNF318,EAF1,TAF5L,POLR2D,FGF24,SOX4A,COMMD1,ZGC:66474,CDK5R2A,DCUN1D3,YTHDF1,HMBOX1A,TADA1,KAT7A,CDK5R2B,UNC119B,MEF2CA,RMND1,ZNF131,SMURF1,SI:DKEY-31C13.1,BDNF,HUWE1,RREB1B,CNBPB,CDK12,DYRK1AA,DYRK1B,BICRA,TRAF2B,TFE3B,ARNT2,ITCHA…
female	MEturquoise	GO:BP	positive regulation of cellular metabolic process	GO:0031325	0.0100061	1.99973	941	1184	83	21828	SS18,TRA2A,ARNTL1A,CITED4B,RBPJA,TRA2B,TEFA,GMEB2,CAB39L1,CNOT3A,SUPT16H,NCOA6,BICRAL,MTA3,CIRBPA,EIF5A2,ERBB2,MAFF,AKIRIN2,ASXL1,DDIT3,PRR16,CHCHD2,ANKRD39,SUPT7L,MTA2,SRFB,ZNF318,ATG14,EAF1,TAF5L,POLR2D,FGF24,SOX4A,COMMD1,ZGC:66474,CDK5R2A,DCUN1D3,YTHDF1,HMBOX1A,TADA1,KAT7A,CDK5R2B,UNC119B,MEF2CA,RMND1,ZNF131,EPHB6,FLT1,SI:DKEY-31C13.1,BDNF,RREB1B,CNBPB,PNPLA2,CDK12,DYRK1AA,DYRK1B,BICRA,TRAF2B,…
female	MEturquoise	GO:BP	translation	GO:0006412	0.0105575	1.97644	482	1184	50	21828	EIF3C,GRA,EIF1,EEF1DB,CNOT3A,GARS1,RPS3,WARS2,EIF5A2,RPL18A,EIF2B2,EIF4H,PRR16,RPL6,GFM1,RPL31,EIF3F,EIF4E2RS1,RARS2,POLR2D,EIF4A1B,MRPL15,RPL15,CNOT1,RPL23A,EIF3K,YTHDF1,PARS2,LARP6A,RMND1,SHMT2,RPS12,RPP30,RPS5,CNBPB,EIF5,EIF2S2,DARS2,NARS2,MRPL16,CPEB1A,RPS23,FTSJ1,PATL1,FXR1,DCP1A,MRRF,EEF1A1B,EIF3BA,ETF1A
female	MEturquoise	GO:BP	negative regulation of response to stimulus	GO:0048585	0.012235	1.91239	432	1184	46	21828	SFPQ,PTBP1A,ARAF,ATL1,SPARTB,SH3BP4,TP53BP2A,TPBGL,SOX4A,PPM1NB,NUMBL,TLE2A,LDLRAD4A,AXIN1,DUSP8A,KICS2,ZGC:171740,SNX25,DLK2,DAB2IPA,SI:DKEY-88E18.8,SPRED3,SFRP2L,SMURF1,SKIB,RGS7B,NOG2,INSIG2,AKAP12B,PLRG1,BAMBIA,DUSP7,SOCS7,LDLRAD4B,PHACTR4B,PPM1BB,PRPF19,DKK1B,FAIMA,WWTR1,EYA2,OTUB1B,OTUD7B,SPRY4,SPRY2,SESN2
female	MEturquoise	GO:BP	peptide biosynthetic process	GO:0043043	0.0132263	1.87856	486	1184	50	21828	EIF3C,GRA,EIF1,EEF1DB,CNOT3A,GARS1,RPS3,WARS2,EIF5A2,RPL18A,EIF2B2,EIF4H,PRR16,RPL6,GFM1,RPL31,EIF3F,EIF4E2RS1,RARS2,POLR2D,EIF4A1B,MRPL15,RPL15,CNOT1,RPL23A,EIF3K,YTHDF1,PARS2,LARP6A,RMND1,SHMT2,RPS12,RPP30,RPS5,CNBPB,EIF5,EIF2S2,DARS2,NARS2,MRPL16,CPEB1A,RPS23,FTSJ1,PATL1,FXR1,DCP1A,MRRF,EEF1A1B,EIF3BA,ETF1A
female	MEturquoise	GO:BP	regulation of alternative mRNA splicing, via spliceosome	GO:0000381	0.0133502	1.87451	35	1184	10	21828	PUF60A,RBM5,CELF3B,KHDRBS1A,RBM7,CELF5A,MBNL2,ZC3H10,RBM15B,FXR1
female	MEturquoise	GO:BP	anatomical structure formation involved in morphogenesis	GO:0048646	0.0134309	1.87189	608	1184	59	21828	SLC2A1B,SFPQ,RBPJA,SIRT1,TNNT2D,ASB2B,PAX2A,PTENB,EXOC5,ERBB2,FZD8A,DCTN1A,NIN,LPAR1,FGF24,POLR1B,SOX4A,CXXC5A,DNMT1,CDK5R2A,ZEB2B,DLK2,DAB2IPA,FOXB1A,GIPC1,LARP6A,MEF2CA,FLT1,STAB1,RAC3B,HDAC4,DISC1,PLEKHG5A,VCLA,DYRK1AA,DYRK1B,SOX9A,PLXDC1,CDC42,WDR43,PLECB,WNK1B,THBS1B,FXR1,WNK1A,MEF2AA,PHACTR4B,LATS1,VASH1,WWTR1,LGALS2A,SOX18,HES6,RAB5C,SPRY2,GIPC2,ITGB8,CHN1,KLF8
female	MEturquoise	GO:BP	regulation of cellular component organization	GO:0051128	0.0192095	1.71648	671	1184	63	21828	PLXNB1B,SFPQ,SI:CH211-203D1.3,CLASP2,PFN2L,WASLA,SVILA,ADD2,EIF5A2,SSH1A,ARPIN,ANKRD39,SPTAN1,EPB41L3B,ARHGEF10LB,DBNLA,GNA12A,SLAIN1A,STON2,BUB3,LDLRAD4A,PHLDB2B,SVILD,METRN,TIAM1B,UNC119B,CDC16,COTL1,AP1AR,GSNA,ZGC:162200,BDNF,RAC3B,EPB41L3A,DISC1,ARPC5A,SAR1B,SSRP1B,NPM1A,CNTFR,FBXW5,TWF1A,CDC42,FXR1,FYCO1B,SLITRK3A,RPTOR,EPS8L3B,ABCC4,SCINLA,KCTD12.1,MAPK1,FLOT1B,AVIL,SI:CH211-66I15.4,TBC1D14…
female	MEturquoise	GO:BP	negative regulation of transforming growth factor beta receptor signaling pathway	GO:0030512	0.0208482	1.68093	12	1184	6	21828	LDLRAD4A,SNX25,SKIB,BAMBIA,LDLRAD4B,PPM1BB
female	MEturquoise	GO:BP	positive regulation of transcription, DNA-templated	GO:0045893	0.0209629	1.67855	481	1184	49	21828	SS18,ARNTL1A,CITED4B,RBPJA,TEFA,GMEB2,SUPT16H,NCOA6,BICRAL,MTA3,MAFF,AKIRIN2,ASXL1,DDIT3,CHCHD2,SUPT7L,MTA2,SRFB,ZNF318,EAF1,TAF5L,SOX4A,ZGC:66474,HMBOX1A,TADA1,KAT7A,MEF2CA,ZNF131,SI:DKEY-31C13.1,RREB1B,CDK12,DYRK1AA,DYRK1B,BICRA,TFE3B,ARNT2,TAF6L,NPM1A,ATF6,SSBP3B,NFYC,MICAL2B,MEF2AA,TFEB,RNF6,WWTR1,SOX18,GABPB2B,JMY
female	MEturquoise	GO:BP	positive regulation of nucleic acid-templated transcription	GO:1903508	0.0209629	1.67855	481	1184	49	21828	SS18,ARNTL1A,CITED4B,RBPJA,TEFA,GMEB2,SUPT16H,NCOA6,BICRAL,MTA3,MAFF,AKIRIN2,ASXL1,DDIT3,CHCHD2,SUPT7L,MTA2,SRFB,ZNF318,EAF1,TAF5L,SOX4A,ZGC:66474,HMBOX1A,TADA1,KAT7A,MEF2CA,ZNF131,SI:DKEY-31C13.1,RREB1B,CDK12,DYRK1AA,DYRK1B,BICRA,TFE3B,ARNT2,TAF6L,NPM1A,ATF6,SSBP3B,NFYC,MICAL2B,MEF2AA,TFEB,RNF6,WWTR1,SOX18,GABPB2B,JMY
female	MEturquoise	GO:BP	positive regulation of RNA biosynthetic process	GO:1902680	0.0209629	1.67855	481	1184	49	21828	SS18,ARNTL1A,CITED4B,RBPJA,TEFA,GMEB2,SUPT16H,NCOA6,BICRAL,MTA3,MAFF,AKIRIN2,ASXL1,DDIT3,CHCHD2,SUPT7L,MTA2,SRFB,ZNF318,EAF1,TAF5L,SOX4A,ZGC:66474,HMBOX1A,TADA1,KAT7A,MEF2CA,ZNF131,SI:DKEY-31C13.1,RREB1B,CDK12,DYRK1AA,DYRK1B,BICRA,TFE3B,ARNT2,TAF6L,NPM1A,ATF6,SSBP3B,NFYC,MICAL2B,MEF2AA,TFEB,RNF6,WWTR1,SOX18,GABPB2B,JMY
female	MEturquoise	GO:BP	nervous system development	GO:0007399	0.0231002	1.63638	1322	1184	107	21828	EPB41L5,PLXNB1B,SEC63,SFPQ,MAPTB,RBPJA,SIRT1,MINK1,PAX2A,PTENB,SCOSPONDIN,TAOK2B,TGIF1,MAPK8IP3,EXOC5,ERBB2,CRTAC1A,LAMC3,IGF2BP2A,DDX3XB,SQSTM1,RBM7,ATL1,PTPRSB,NYAP2A,DAGLA,SOX1B,ATP1B2B,PRDM8B,FZD8A,BTBD9,DCTN1A,SPTAN1,NIN,DBNLA,LPAR1,GNA12A,FGF24,SOX1A,NUMBL,ACSL3A,POU3F2A,NAV1B,CAPN1A,METRN,POU3F3A,ADCY8,PTPRO,TIAM1B,FOXB1A,UNC119B,OLFM1B,FZD3A,RTN4R,EPHB6,GSNA,SMARCD1,BDNF,RAC3B,EPB41L3A,DI…
female	MEturquoise	GO:BP	positive regulation of metabolic process	GO:0009893	0.0233798	1.63116	1022	1184	87	21828	SS18,TRA2A,ARNTL1A,CITED4B,RBPJA,TRA2B,TEFA,GMEB2,CAB39L1,ARNTL1B,CNOT3A,SUPT16H,NCOA6,BICRAL,MTA3,CIRBPA,EIF5A2,ERBB2,MAFF,AKIRIN2,ASXL1,DDIT3,PRR16,CHCHD2,ANKRD39,SUPT7L,MTA2,SRFB,ZNF318,ATG14,EAF1,TAF5L,POLR2D,FGF24,SOX4A,COMMD1,ZGC:66474,CDK5R2A,DCUN1D3,YTHDF1,HMBOX1A,TADA1,KAT7A,CDK5R2B,UNC119B,MEF2CA,RMND1,ZNF131,EPHB6,FLT1,SMURF1,SI:DKEY-31C13.1,BDNF,HUWE1,RREB1B,CNBPB,PNPLA2,CDK12,DYRK1AA…
female	MEturquoise	GO:BP	negative regulation of transmembrane receptor protein serine/threonine kinase signaling pathway	GO:0090101	0.0250558	1.60109	45	1184	11	21828	ARAF,ATL1,SPARTB,LDLRAD4A,SNX25,SMURF1,SKIB,NOG2,BAMBIA,LDLRAD4B,PPM1BB
female	MEturquoise	GO:BP	organonitrogen compound biosynthetic process	GO:1901566	0.0262122	1.5815	1250	1184	102	21828	EIF3C,GRA,EIF1,ZGC:85858,ADCY7,EEF1DB,OAT,CNOT3A,GARS1,B3GALT2,RPS3,ST8SIA5,WARS2,EIF5A2,PAPSS2A,RPL18A,EIF2B2,EIF4H,GXYLT1A,PRR16,RPL6,PAPSS1,GFM1,PTDSS1B,DPY19L3,PAICS,RPL31,EIF3F,SMPD2A,GOT1,EIF4E2RS1,RARS2,HPRT1,ALAS1,POLR2D,EIF4A1B,B4GALT3,CERS6,PIGM,MRPL15,RPL15,CERS2A,CNOT1,PIGX,ZDHHC12B,GALNT7,RPL23A,EIF3K,NADKA,YTHDF1,ADCY8,ZDHHC22,PARS2,ELOVL7A,POMT1,B3GNT7,TMTC1,LARP6A,SPTLC2A,RMND1,SH…
female	MEturquoise	GO:BP	regulation of cellular response to transforming growth factor beta stimulus	GO:1903844	0.0303029	1.51852	18	1184	7	21828	TGIF1,LDLRAD4A,SNX25,SKIB,BAMBIA,LDLRAD4B,PPM1BB
female	MEturquoise	GO:BP	regulation of transforming growth factor beta receptor signaling pathway	GO:0017015	0.0303029	1.51852	18	1184	7	21828	TGIF1,LDLRAD4A,SNX25,SKIB,BAMBIA,LDLRAD4B,PPM1BB
female	MEturquoise	GO:BP	positive regulation of macromolecule metabolic process	GO:0010604	0.0303888	1.51729	926	1184	80	21828	SS18,TRA2A,ARNTL1A,CITED4B,RBPJA,TRA2B,TEFA,GMEB2,CAB39L1,ARNTL1B,CNOT3A,SUPT16H,NCOA6,BICRAL,MTA3,CIRBPA,EIF5A2,MAFF,AKIRIN2,ASXL1,DDIT3,PRR16,CHCHD2,ANKRD39,SUPT7L,MTA2,SRFB,ZNF318,EAF1,TAF5L,POLR2D,FGF24,SOX4A,COMMD1,ZGC:66474,CDK5R2A,DCUN1D3,YTHDF1,HMBOX1A,TADA1,KAT7A,CDK5R2B,UNC119B,MEF2CA,RMND1,ZNF131,SMURF1,SI:DKEY-31C13.1,BDNF,HUWE1,RREB1B,CNBPB,CDK12,DYRK1AA,DYRK1B,BICRA,TRAF2B,TFE3B,ARN…
female	MEturquoise	GO:BP	positive regulation of biological process	GO:0048518	0.0350419	1.45541	1992	1184	149	21828	SS18,TRA2A,EPB41L5,PLXNB1B,ARNTL1A,CITED4B,RBPJA,TRA2B,TEFA,SI:DKEY-151G10.3,SIRT1,PFN2L,GMEB2,S100B,CAB39L1,WASLA,PTBP1A,ARNTL1B,CNOT3A,SUPT16H,MAP3K7,NCOA6,RPS3,BICRAL,MTA3,CIRBPA,MAPK8IP3,EIF5A2,ERBB2,MAFF,AKIRIN2,ASXL1,DDIT3,PRR16,CDK2,CHCHD2,ANKRD39,SUPT7L,AKAP12A,MTA2,SGTA,JAK2B,SRFB,ZNF318,ATG14,EAF1,TAF5L,ARHGEF10LB,POLR2D,DBNLA,FGF24,SOX4A,PPM1NB,NUMBL,COMMD1,SLAIN1A,ZGC:66474,CDK5R2A,IL…
female	MEturquoise	GO:BP	cellular nitrogen compound biosynthetic process	GO:0044271	0.035491	1.44988	3801	1184	259	21828	EIF3C,SS18,CRY3A,TCF3B,KAT5B,GTF2A1,CRY3B,MYEF2,ARNTL1A,GRA,MED20,CITED4B,SFPQ,RBPJA,YY1B,NFYAL,TEFA,EIF1,ADCY7,RXRBA,SIRT1,ZMIZ2,GMEB2,ZGC:65895,EEF1DB,ARNTL1B,CNOT3A,GARS1,SUPT16H,PAX2A,NCOA6,CCAR1,TAF5,TXNDC15,RPS3,TAF10,BICRAL,POLRMT,MTA3,SI:CH211-79K12.2,WARS2,TGIF1,EIF5A2,MAFF,PAPSS2A,RPL18A,POU4F1,STAT5B,EIF2B2,AKIRIN2,EIF4H,ASXL1,DDIT3,ZNF76,ARID2,PRR16,RPL6,PAPSS1,SOX1B,SAFB,GFM1,PAICS,C…
female	MEturquoise	GO:BP	cellular protein metabolic process	GO:0044267	0.0385225	1.41429	4059	1184	274	21828	EIF3C,CRY3A,KDM5BB,KAT5B,CRY3B,LONP1,GRA,PRKAG3A,USP49,PTPN12,OTUD5A,TTLL5,BAP1,PELI3,TGM1L1,EIF1,PRKAG2A,SI:DKEY-151G10.3,RNF220A,ZGC:85858,SI:CH211-203D1.3,CDKN1BB,SIRT1,EEF1DB,CAB39L1,MINK1,ARAF,CNOT3A,CDK11B,GARS1,MAP3K7,ASB2B,PTENB,TLK1B,PDPK1A,B3GALT2,UBL7B,PPM1DB,RPS3,TAF10,CASKA,NUB1,ST8SIA5,APLP2,PPIAB,TAOK2B,RPS6KB1A,MTA3,WARS2,RNF41,BRPF3B,RNF170,EIF5A2,USP40,ERBB2,UBE2B,RPL18A,PLOD2,P…
female	MEturquoise	GO:BP	regulation of signal transduction	GO:0009966	0.0400638	1.39725	1067	1184	89	21828	EPB41L5,PELI3,S100B,PTBP1A,MINK1,ARAF,MAP3K7,PTENB,DENND4C,RPS3,TAOK2B,TGIF1,MAPK8IP3,ERBB2,ATL1,DDIT3,ANKRD39,AKAP12A,SPARTB,PLPP3,EAF1,GPC5C,SH3BP4,TP53BP2A,TPBGL,SOX4A,PPM1NB,PDCL,NUMBL,TLE2A,LDLRAD4A,AXIN1,DUSP8A,UACAA,KICS2,STARD13A,ZMP:0000000660,ZGC:171740,SNX25,PTPRO,DLK2,DAB2IPA,RALGAPA2,SI:DKEY-88E18.8,SPRED3,SFRP2L,SMURF1,CACNG2A,SKIB,RGS7B,SPRED1,SCRT2,NOG2,TRAF2B,INSIG2,IQSEC2B,TAOK2…
female	MEturquoise	GO:CC	cytoplasm	GO:0005737	1.74396e-16	15.7585	6733	1084	491	20566	EIF3C,CRY3A,EPB41L5,SEC63,CRY3B,OPA1,LONP1,MYEF2,MID1IP1L,ARNTL1A,GRA,ECPAS,MAPTB,PRKAG3A,USP49,SRSF6A,SGPL1,EIF1,PRKAG2A,SI:DKEY-151G10.3,ZGC:85858,SI:CH211-203D1.3,CDKN1BB,CLASP2,PDIA7,PFN2L,S100B,EEF1DB,CIAO1,DNAJB6A,JPT1B,VAC14,CPSF6,G3BP1,CELF3B,UBAP2L,OAT,SVILA,UVRAG,ARNTL1B,MINK1,ARAF,TMEM214,CNOT3A,FGD5A,GARS1,NECAP2,TNNT2D,PTENB,SPRYD3,ITPKB,CCT2,DCTN2,MRM3A,MACO1A,PDAP1A,B3GALT2,UBL7B,D…
female	MEturquoise	GO:CC	membrane-bounded organelle	GO:0043227	1.13323e-10	9.94568	8346	1084	554	20566	SS18,CRY3A,HNRNPH1,SRSF6B,SRSF11,TRA2A,KDM5BB,KAT5B,SEC63,GTF2A1,CRY3B,OPA1,LONP1,MYEF2,MID1IP1L,ARNTL1A,MED20,CITED4B,SFPQ,PRKAG3A,RBPJA,YY1B,NFYAL,TRA2B,GINS2,UGT5E1,SRSF6A,SGPL1,TEFA,TRIM33,MBD3B,PRKAG2A,ZGC:85858,RXRBA,CDKN1BB,PDIA7,SIRT1,PUF60A,GMEB2,RBM5,S100B,DNAJB6A,JPT1B,VAC14,SYNE3,CHTOPA,NAIF1,WASLA,CPSF6,CELF3B,SRSF1A,PES,PCM1,UBAP2L,UVRAG,PTBP1A,ARNTL1B,ARAF,TMEM214,CNOT3A,NECAP2,SUP…
female	MEturquoise	GO:CC	intracellular membrane-bounded organelle	GO:0043231	3.2168e-10	9.49258	8112	1084	539	20566	SS18,CRY3A,HNRNPH1,SRSF6B,SRSF11,TRA2A,KDM5BB,KAT5B,SEC63,GTF2A1,CRY3B,OPA1,LONP1,MYEF2,MID1IP1L,ARNTL1A,MED20,CITED4B,SFPQ,PRKAG3A,RBPJA,YY1B,NFYAL,TRA2B,GINS2,UGT5E1,SRSF6A,SGPL1,TEFA,TRIM33,MBD3B,PRKAG2A,ZGC:85858,RXRBA,CDKN1BB,PDIA7,SIRT1,PUF60A,GMEB2,RBM5,S100B,DNAJB6A,JPT1B,VAC14,SYNE3,CHTOPA,NAIF1,WASLA,CPSF6,CELF3B,SRSF1A,PES,UBAP2L,UVRAG,PTBP1A,ARNTL1B,ARAF,TMEM214,CNOT3A,NECAP2,SUPT16H,…
female	MEturquoise	GO:CC	endomembrane system	GO:0012505	9.61589e-09	8.01701	1799	1084	159	20566	SEC63,SGPL1,ZGC:85858,CDKN1BB,PDIA7,SIRT1,FCHO2,VAC14,SYNE3,UVRAG,TMEM214,AIG1,MACO1A,B3GALT2,DENND4C,ST8SIA5,B4GALNT4B,TMED7,RTN1A,RNF170,EIF5A2,RTN1B,DENND10,RAB7A,TFG,PLOD2,VAPB,ATL1,SEC24B,ZGC:158254,CCZ1,PTDSS1B,RAB6BA,DPY19L3,PGAP2,CCDC186,TMCC2,SMPD2A,MCTP1B,MANEA,ERLIN1,JAK2B,ATG14,EPN3B,HM13,BCAP31,GOLGB1,SEC31A,CHMP1A,DBNLA,LPAR1,EMC10,B4GALT3,TMCC1B,SH3BP4,ESYT1A,ERAP1B,TRIP11,PLD2,PGR…
female	MEturquoise	GO:CC	intracellular anatomical structure	GO:0005622	6.63348e-06	5.17826	12687	1084	753	20566	EIF3C,SS18,CRY3A,HNRNPH1,SRSF6B,SRSF11,TRA2A,KDM5BB,EPB41L5,KAT5B,SEC63,GTF2A1,CRY3B,OPA1,LONP1,MYEF2,MID1IP1L,ARNTL1A,GRA,ECPAS,MED20,CITED4B,SFPQ,MAPTB,PRKAG3A,USP49,RBPJA,YY1B,NFYAL,TRA2B,GINS2,UGT5E1,SRSF6A,SGPL1,TEFA,EIF1,TRIM33,MBD3B,PRKAG2A,SI:DKEY-151G10.3,ZGC:85858,SI:CH211-203D1.3,RXRBA,CDKN1BB,CLASP2,PDIA7,SIRT1,EHBP1L1B,PUF60A,PFN2L,GMEB2,RBM5,S100B,EEF1DB,CIAO1,DNAJB6A,JPT1B,VAC14,SY…
female	MEturquoise	GO:CC	organelle	GO:0043226	6.48774e-05	4.18791	10781	1084	649	20566	SS18,CRY3A,HNRNPH1,SRSF6B,SRSF11,TRA2A,KDM5BB,EPB41L5,KAT5B,SEC63,GTF2A1,CRY3B,OPA1,LONP1,MYEF2,MID1IP1L,ARNTL1A,GRA,MED20,CITED4B,SFPQ,MAPTB,PRKAG3A,RBPJA,YY1B,NFYAL,TRA2B,GINS2,UGT5E1,SRSF6A,SGPL1,TEFA,TRIM33,MBD3B,PRKAG2A,ZGC:85858,RXRBA,CDKN1BB,CLASP2,PDIA7,SIRT1,EHBP1L1B,PUF60A,PFN2L,GMEB2,RBM5,S100B,DNAJB6A,JPT1B,VAC14,SYNE3,CHTOPA,NAIF1,WASLA,CPSF6,G3BP1,CELF3B,SRSF1A,PES,PCM1,UBAP2L,SVILA…
female	MEturquoise	GO:CC	nucleoplasm	GO:0005654	6.97503e-05	4.15645	543	1084	58	20566	HNRNPH1,SRSF6B,SRSF11,KAT5B,GTF2A1,SFPQ,GINS2,MBD3B,SIRT1,CHTOPA,CPSF6,SUPT16H,PTENB,NCOA6,TAF5,TAF10,MTA3,BRPF3B,RBM7,SUPT7L,MTA2,ZNF318,MITFB,RBBP5,EAF1,TAF5L,POLR2D,RBM4.3,GRSF1,ZBTB14,SRSF10B,KPNA4,PHF21AA,HNRNPH3,KANSL1A,FRG1,SRP54,MBNL2,TADA1,HDAC4,BRMS1LB,SETX,CDK12,EPC1A,RNPS1,TAF6L,SSRP1B,NPM1A,ZC3H10,KDM6AL,ZGC:77262,NELFA,GTF2E2,ZGC:174877,RNF6,PRPF19,SRSF4,SRSF3B
female	MEturquoise	GO:CC	intracellular organelle	GO:0043229	9.51179e-05	4.02174	10573	1084	637	20566	SS18,CRY3A,HNRNPH1,SRSF6B,SRSF11,TRA2A,KDM5BB,EPB41L5,KAT5B,SEC63,GTF2A1,CRY3B,OPA1,LONP1,MYEF2,MID1IP1L,ARNTL1A,GRA,MED20,CITED4B,SFPQ,MAPTB,PRKAG3A,RBPJA,YY1B,NFYAL,TRA2B,GINS2,UGT5E1,SRSF6A,SGPL1,TEFA,TRIM33,MBD3B,PRKAG2A,ZGC:85858,RXRBA,CDKN1BB,CLASP2,PDIA7,SIRT1,EHBP1L1B,PUF60A,PFN2L,GMEB2,RBM5,S100B,DNAJB6A,JPT1B,VAC14,SYNE3,CHTOPA,NAIF1,WASLA,CPSF6,G3BP1,CELF3B,SRSF1A,PES,PCM1,UBAP2L,SVILA…
female	MEturquoise	GO:CC	protein-containing complex	GO:0032991	0.000180784	3.74284	4301	1084	292	20566	EIF3C,HNRNPH1,TCF3B,TRA2A,EPB41L5,PLXNB1B,KAT5B,SEC63,GTF2A1,MYEF2,ARNTL1A,MED20,PRKAG3A,RBPJA,YY1B,NFYAL,TRA2B,GINS2,GNAI2B,EIF1,GABRG2,MBD3B,PRKAG2A,EHBP1L1B,RBM5,EEF1DB,CIAO1,VAC14,NCBP2,CPSF6,G3BP1,CELF3B,ARNTL1B,CNOT3A,NECAP2,SUPT16H,TNNT2D,ASB2B,KCNC2,CACNA1BA,U2AF1,H3F3D,CGNL1,CNOT9,CCT2,DCTN2,NCOA6,DENND4C,TAF5,SART1,RPS3,TAF10,BICRAL,POLRMT,PPP4R1,MTA3,CIRBPA,BRPF3B,EIF5A2,EXOC5,HNRNPM,E…
female	MEturquoise	GO:CC	catalytic complex	GO:1902494	0.000353954	3.45105	1056	1084	92	20566	KAT5B,GTF2A1,PRKAG3A,GNAI2B,MBD3B,PRKAG2A,VAC14,ASB2B,DCTN2,NCOA6,TAF5,TAF10,BICRAL,POLRMT,PPP4R1,MTA3,BRPF3B,UBE2B,CBX2,DNAH3,CDK2,SPG7,SUPT7L,ARID1AA,CCDC65,FBXL3B,MTA2,ATG14,DRC1,RBBP5,DCTN1A,PIK3R1,GNG12A,TAF5L,POLR2D,GNA12A,POLR1B,POLR3B,ADRM1,FBXL18,PDHX,ANAPC10,CDK5R2A,PSMB6,KEAP1B,NDUFB3,DCUN1D3,PHF21AA,SI:DKEY-119F1.1,KANSL1A,PIK3R2,SF3B2,SPSB4A,PSMA1,POLE4,FRG1,TADA1,DYNC1H1,SNRPB,CDK5R…
female	MEturquoise	GO:CC	nuclear outer membrane-endoplasmic reticulum membrane network	GO:0042175	0.000696093	3.15733	409	1084	45	20566	SEC63,ZGC:85858,SYNE3,TMEM214,MACO1A,TMED7,RTN1A,RNF170,EIF5A2,RTN1B,PLOD2,VAPB,SEC24B,PTDSS1B,HM13,BCAP31,SEC31A,ESYT1A,ERAP1B,CERS2A,PIGX,ZDHHC12B,TMED3,ZGC:63863,ZDHHC22,REEP1,ELOVL7A,SPTLC2A,VTI1A,PEMT,TTYH1,EMC4,CERS2B,INSIG2,ATF6,ATP6AP2,ELOVL5,PTGS2A,ABCC4,ABCB9,ALG8,ITPR1B,GRAMD1BA,ZGC:86609,SI:DKEY-239I20.2
female	MEturquoise	GO:CC	endoplasmic reticulum membrane	GO:0005789	0.000845148	3.07307	399	1084	44	20566	SEC63,ZGC:85858,TMEM214,MACO1A,TMED7,RTN1A,RNF170,EIF5A2,RTN1B,PLOD2,VAPB,SEC24B,PTDSS1B,HM13,BCAP31,SEC31A,ESYT1A,ERAP1B,CERS2A,PIGX,ZDHHC12B,TMED3,ZGC:63863,ZDHHC22,REEP1,ELOVL7A,SPTLC2A,VTI1A,PEMT,TTYH1,EMC4,CERS2B,INSIG2,ATF6,ATP6AP2,ELOVL5,PTGS2A,ABCC4,ABCB9,ALG8,ITPR1B,GRAMD1BA,ZGC:86609,SI:DKEY-239I20.2
female	MEturquoise	GO:CC	endoplasmic reticulum subcompartment	GO:0098827	0.0010281	2.98797	402	1084	44	20566	SEC63,ZGC:85858,TMEM214,MACO1A,TMED7,RTN1A,RNF170,EIF5A2,RTN1B,PLOD2,VAPB,SEC24B,PTDSS1B,HM13,BCAP31,SEC31A,ESYT1A,ERAP1B,CERS2A,PIGX,ZDHHC12B,TMED3,ZGC:63863,ZDHHC22,REEP1,ELOVL7A,SPTLC2A,VTI1A,PEMT,TTYH1,EMC4,CERS2B,INSIG2,ATF6,ATP6AP2,ELOVL5,PTGS2A,ABCC4,ABCB9,ALG8,ITPR1B,GRAMD1BA,ZGC:86609,SI:DKEY-239I20.2
female	MEturquoise	GO:CC	cytoplasmic vesicle	GO:0031410	0.00106722	2.97174	689	1084	65	20566	CDKN1BB,VAC14,UVRAG,NECAP2,DENND4C,TMED7,DENND10,RAB7A,SQSTM1,ATL1,SEC24B,RUSC2,CCZ1,MCTP1B,EPN3B,CHMP1A,DBNLA,LPAR1,SH3BP4,COMMD1,STON2,GPR61,LDLRAD4A,TMED3,VOPP1,AFTPHA,RAB14L,NEURL1B,STX3A,VPS41,VTI1A,RAB38C,SYT4,SYNGR3A,BDNF,RAC3B,ATP11C,PLEKHG5A,PICALMB,SYT7B,SAR1B,SGIP1A,RAB27A,BLOC1S5,EHD4,NBR1B,VPS54,PIK3C3,OPTN,FYCO1B,RAB8A,ABCC4,ATP11B,SYT1B,WASHC2C,FLOT1B,AP1S2,TBC1D14,RAB5C,DDHD2,CLCN…
female	MEturquoise	GO:CC	intracellular vesicle	GO:0097708	0.00106722	2.97174	689	1084	65	20566	CDKN1BB,VAC14,UVRAG,NECAP2,DENND4C,TMED7,DENND10,RAB7A,SQSTM1,ATL1,SEC24B,RUSC2,CCZ1,MCTP1B,EPN3B,CHMP1A,DBNLA,LPAR1,SH3BP4,COMMD1,STON2,GPR61,LDLRAD4A,TMED3,VOPP1,AFTPHA,RAB14L,NEURL1B,STX3A,VPS41,VTI1A,RAB38C,SYT4,SYNGR3A,BDNF,RAC3B,ATP11C,PLEKHG5A,PICALMB,SYT7B,SAR1B,SGIP1A,RAB27A,BLOC1S5,EHD4,NBR1B,VPS54,PIK3C3,OPTN,FYCO1B,RAB8A,ABCC4,ATP11B,SYT1B,WASHC2C,FLOT1B,AP1S2,TBC1D14,RAB5C,DDHD2,CLCN…
female	MEturquoise	GO:CC	vesicle	GO:0031982	0.00113503	2.94499	733	1084	68	20566	CDKN1BB,VAC14,UVRAG,NECAP2,DENND4C,TMED7,DENND10,RAB7A,SQSTM1,ATL1,SEC24B,RUSC2,CCZ1,MCTP1B,EPN3B,CHMP1A,DBNLA,LPAR1,SH3BP4,COMMD1,STON2,GPR61,LDLRAD4A,TMED3,VOPP1,AFTPHA,RAB14L,NEURL1B,STX3A,VPS41,VTI1A,RAB38C,MYO15AB,SYT4,SYNGR3A,BDNF,RAC3B,ATP11C,PLEKHG5A,PICALMB,SYT7B,SAR1B,SGIP1A,RAB27A,BLOC1S5,EHD4,NBR1B,VPS54,PIK3C3,OPTN,FYCO1B,RAB8A,ABCC4,ATP11B,SYT1B,WASHC2C,FLOT1B,AP1S2,TBC1D14,RAB5C,PR…
female	MEturquoise	GO:CC	organelle membrane	GO:0031090	0.00179773	2.74528	1375	1084	110	20566	SEC63,OPA1,ZGC:85858,SIRT1,VAC14,SYNE3,TMEM214,NECAP2,MACO1A,B3GALT2,DENND4C,RPS3,DHRS13L1,B4GALNT4B,TMEM11,TMED7,RTN1A,RNF170,EIF5A2,RTN1B,PLOD2,VAPB,SEC24B,ATP6V0A1A,PTDSS1B,DPY19L3,SPG7,PGAP2,MCTP1B,MANEA,ATG14,EPN3B,HM13,BCAP31,SEC31A,CHMP1A,DBNLA,B4GALT3,ESYT1A,ERAP1B,CERS2A,PEX5,PEX19,PEX11G,PIGX,ZDHHC12B,GALNT7,LDLRAD4A,TMED3,ZGC:112052,NDUFB3,ZGC:63863,KICS2,VOPP1,SLC35A5,AFTPHA,ZDHHC22,R…
female	MEturquoise	GO:CC	organelle subcompartment	GO:0031984	0.00185398	2.73189	560	1084	55	20566	SEC63,ZGC:85858,TMEM214,MACO1A,B4GALNT4B,TMED7,RTN1A,RNF170,EIF5A2,RTN1B,PLOD2,VAPB,SEC24B,PTDSS1B,CCDC186,HM13,BCAP31,SEC31A,B4GALT3,ESYT1A,ERAP1B,CERS2A,PIGX,ZDHHC12B,TMED3,ZGC:63863,AFTPHA,ZDHHC22,REEP1,RAB14L,ELOVL7A,SPTLC2A,VTI1A,PEMT,RAB38C,TTYH1,ATP11C,EMC4,ATP9B,CERS2B,INSIG2,ATF6,ATP6AP2,ELOVL5,RELCH,PTGS2A,ABCC4,ATP11B,ABCB9,HID1A,ALG8,ITPR1B,GRAMD1BA,ZGC:86609,SI:DKEY-239I20.2
female	MEturquoise	GO:CC	cytoskeleton	GO:0005856	0.00218021	2.6615	1180	1084	97	20566	EPB41L5,MAPTB,MBD3B,EHBP1L1B,PFN2L,WASLA,PCM1,SVILA,FGD5A,TNNT2D,CGNL1,DCTN2,ERC1A,RPS3,FRMPD3,ADD2,SSH1A,DNAH3,MYO1D,CCDC65,MAP7D1B,MYH11A,JAK2B,DRC1,DCTN1A,SPTAN1,EPB41L3B,NIN,DBNLA,CLIP2,IFT74,SLAIN1A,DNM1A,MAPTA,SGCB,DNM2A,TACC2,SVILD,DZIP1,KIZ,REEP1,ANLN,ANK2B,SI:CH73-362M14.4,DYNC1H1,UNC119B,COTL1,PREPL,MAP7D2A,FUZ,GSNA,MYO15AB,SGCE,SEPT7A,RAC3B,EPB41L3A,DISC1,SHROOM2B,VCLA,ERC1B,SSNA1,ARPC…
female	MEturquoise	GO:CC	endoplasmic reticulum	GO:0005783	0.0025871	2.58719	708	1084	65	20566	SEC63,SGPL1,ZGC:85858,PDIA7,TMEM214,MACO1A,TMED7,RTN1A,RNF170,EIF5A2,RTN1B,TFG,PLOD2,VAPB,SEC24B,ZGC:158254,PTDSS1B,SMPD2A,ERLIN1,HM13,BCAP31,SEC31A,EMC10,ESYT1A,ERAP1B,RNF139,P4HB,CERS2A,ACSL3A,PIGX,ZDHHC12B,TMED3,ZGC:112052,ZGC:63863,ZDHHC22,CALR,REEP1,ELOVL7A,TMTC1,SPTLC2A,VTI1A,PEMT,TTYH1,ATP11C,EMC4,CERS2B,CAMLG,INSIG2,SAR1B,ATF6,ATP6AP2,ELOVL5,EI24,MTMR12,PTGS2A,ABCC4,ATP11B,ABCB9,SLC30A1A,…
female	MEturquoise	GO:CC	transferase complex	GO:1990234	0.0160321	1.79501	576	1084	53	20566	KAT5B,GTF2A1,PRKAG3A,PRKAG2A,VAC14,ASB2B,NCOA6,TAF5,TAF10,POLRMT,BRPF3B,UBE2B,CBX2,CDK2,SUPT7L,FBXL3B,ATG14,RBBP5,PIK3R1,TAF5L,POLR2D,POLR1B,POLR3B,FBXL18,ANAPC10,CDK5R2A,KEAP1B,DCUN1D3,SI:DKEY-119F1.1,KANSL1A,PIK3R2,SPSB4A,POLE4,TADA1,CDK5R2B,CDC16,KLHL8,SPTLC2A,FBXL14A,ZSWIM6,ZER1,CDK12,EPC1A,CCNI,TAF6L,KDM6AL,FBXW5,PIK3C3,PLRG1,GTF2E2,SOCS7,FBXL14B,RNF14
female	MEturquoise	GO:CC	coated vesicle	GO:0030135	0.0364652	1.43812	117	1084	17	20566	NECAP2,TMED7,SEC24B,EPN3B,DBNLA,SH3BP4,STON2,TMED3,AFTPHA,VPS41,VTI1A,PICALMB,SAR1B,SGIP1A,RAB8A,AP1S2,DDHD2
female	MEturquoise	GO:CC	intracellular protein-containing complex	GO:0140535	0.0411651	1.38547	583	1084	52	20566	KAT5B,GTF2A1,ARNTL1A,PRKAG3A,PRKAG2A,NCBP2,ARNTL1B,CNOT3A,ASB2B,CNOT9,TAF5,TAF10,POLRMT,PPP4R1,BRPF3B,UBE2B,CBX2,PRKAR1AA,SUPT7L,FBXL3B,TAF5L,POLR2D,POLR1B,POLR3B,CNOT1,ADRM1,FBXL18,ANAPC10,PSMB6,KEAP1B,DCUN1D3,KANSL1A,SPSB4A,PSMA1,POLE4,TADA1,CDC16,KLHL8,FBXL14A,ZSWIM6,ZER1,EPC1A,TAF6L,CNOT11,FBXW5,PLRG1,RIC1,FAM98B,GTF2E2,RPTOR,FBXL14B,RNF14
female	MEturquoise	GO:CC	transcription regulator complex	GO:0005667	0.0467916	1.32983	240	1084	27	20566	TCF3B,GTF2A1,ARNTL1A,YY1B,NFYAL,MBD3B,ARNTL1B,NCOA6,TAF5,TAF10,MTA3,MAFF,DDIT3,GTF3C2,MTA2,TAF5L,TLE2A,SMAD7,SKIB,SMAD4A,TCF7L2,ARNT2,TAF6L,TCF3A,NFYC,GTF2E2,HES6
female	MEturquoise	KEGG	MAPK signaling pathway	KEGG:04010	0.00314373	2.50255	325	433	47	5305	MAPTB,ARAF,MAP3K7,CACNA1BA,TAOK2B,MAPK8IP3,CACNA1DA,DDIT3,ZMP:0000000936,MAP2K2B,GNG12A,GNA12A,FGF24,KDRL,PPM1NB,MAPTA,DUSP8A,FGFR2,TAB1,MEF2CA,CACNG2A,BDNF,RAC3B,NFATC1,TRAF2B,RAF1A,PPP3CB,FGF2,RELA,TAOK2A,CDC42,MAP3K1,DUSP7,MAP3K4,FAS,CACNA1IA,FOSAA,PPM1BB,PLA2G4AA,RAP1B,NRADD,NFATC3B,PRKACAB,CACNG7B,EFNA5B,CACNG7A,STMN1A
female	MEturquoise	KEGG	Spliceosome	KEGG:03040	0.00962735	2.01649	118	433	22	5305	HNRNPA3,SRSF6B,TRA2A,TRA2B,SRSF6A,RBMX,PUF60A,NCBP2,U2AF1,SART1,HNRNPM,SNRPC,SRSF10B,DDX46,SF3B2,TAF15,SNRPB,ALYREF,SF3A2,PRPF19,SRSF4,SRSF3B
female	MEturquoise	REAC	mRNA 3'-end processing	REAC:R-DRE-72187	0.0036725	2.43504	44	541	13	7340	SRSF6B,SRSF11,NCBP2,CHTOPA,CPSF6,U2AF1,CSTF2,ALYREF,CASC3,UPF3B,PABPN1,SRSF4,SRSF3B
female	MEturquoise	HP	Atonic seizure	HP:0010819	0.00977536	2.00987	129	381	25	5148	KDM5BB,SLC2A1B,GABRG2,CHD2,PTENB,ALDH4A1,CASKA,TRIM8B,GABRB1,PIGM,DNM1A,DYNC1H1,AP2M1B,CACNG2A,KIRREL3A,DYRK1AA,ASAH1B,SYNGAP1A,IQSEC2B,CAMK2B1,ATP6AP2,KCNQ5A,BRSK2A,CASKB,GRIN1B
female	MEturquoise	HP	Typical absence seizure	HP:0011147	0.0114088	1.94276	76	381	18	5148	KDM5BB,SLC2A1B,GABRG2,PTENB,ALDH4A1,GABRB1,DYNC1H1,SATB2,CACNG2A,KIRREL3A,DYRK1AA,ASAH1B,SYNGAP1A,CAMK2B1,WACB,KCNQ5A,BRSK2A,GRIN1B
female	MEturquoise	HP	Thin corpus callosum	HP:0033725	0.014432	1.84067	886	381	98	5148	KDM5BB,PCLOA,OPA1,LONP1,OTUD5A,YY1B,GAS1B,PUF60A,RAB3GAP1,VAC14,CRBN,CNOT3A,TXNDC15,CASKA,NCDN,DHCR24,TGIF1,MAPK8IP3,DDX3XB,ATL1,ASXL1,ARID2,RNF13,GFM1,PTDSS1B,MAP2K2B,ARID1AA,TRIM8B,SPTAN1,BCAP31,CHMP1A,B3GLCTA,SOX4A,VANGL2,CNOT1,IRF2BPL,BUB3,PDHX,AIMP2,TMEM260,KANSL1A,FGFR2,ZEB2B,PARS2,DYNC1H1,TCTN1,POMT1,MEF2CA,VPS41,RMND1,SHMT2,CLCN4,LMAN2LB,FUZ,MAN2B1,WDR45B,SMARCD1,CACNG2A,HUWE1,RAC3B,DISC1…
female	MEturquoise	HP	Abnormal muscle tone	HP:0003808	0.0197711	1.70397	2269	381	208	5148	KDM5BB,MKRN1,PCLOA,OPA1,LONP1,SLC2A1B,MAPTB,OTUD5A,YY1B,SGPL1,GABRG2,GAS1B,PUF60A,RAB3GAP1,FBXO7,VAC14,CHD2,CRBN,UNC13A,CNOT3A,GARS1,CACNA1BA,NIPBLB,PTENB,ACAD9,CASKA,NCDN,DHCR24,WARS2,TGIF1,MAPK8IP3,DOCK3,CACNA1DA,POU4F1,DDX3XB,VAPB,SQSTM1,ATL1,EIF2B2,EIF4H,ASXL1,CWC27,ZGC:158254,NOP56,ARID2,RNF13,PNPLA6,KANK1A,GFM1,PTDSS1B,PGAP2,MAP2K2B,ATP6AP1A,ARID1AA,SPARTB,NDUFAF3,ERLIN1,ASCL1A,HADHAB,SI:DK…
female	MEturquoise	HP	Gait disturbance	HP:0001288	0.0210112	1.67755	1274	381	130	5148	KDM5BB,OPA1,LONP1,SLC2A1B,MAPTB,YY1B,BAP1,GABRG2,GAS1B,FBXO7,VAC14,CHD2,CNOT3A,GARS1,CACNA1BA,PTENB,ALDH4A1,CASKA,WARS2,TGIF1,MAPK8IP3,RNF170,GYG1A,DOCK3,DDX3XB,SQSTM1,PITRM1,ATL1,EIF2B2,EIF4H,ASXL1,ZGC:158254,NOP56,PNPLA6,CHCHD2,PGAP2,SPARTB,SI:DKEY-106G10.7,ERLIN1,HADHAB,SI:DKEY-178E17.1,FGF12B,DCTN1A,GABRB1,DSTYK,ERAP1B,SORD,ATAD1B,DNM1A,PDHX,MAPTA,SGCB,AIMP2,IL11RA,DNM2A,DHX30,TMEM240B,ZEB2B,…
female	MEturquoise	HP	Atrophy/Degeneration affecting the central nervous system	HP:0007367	0.0218681	1.66019	1023	381	109	5148	KDM5BB,PCLOA,OPA1,LONP1,SLC2A1B,MAPTB,OTUD5A,GABRG2,PUF60A,RAB3GAP1,VAC14,CRBN,UNC13A,CNOT3A,CACNA1BA,NIPBLB,CASKA,NCDN,WARS2,MAPK8IP3,DOCK3,VAPB,SQSTM1,PITRM1,ATL1,EIF4H,CWC27,PNPLA6,KANK1A,GFM1,PGAP2,MAP2K2B,NDUFAF3,FGF12B,TRIM8B,RARS2,DCTN1A,SPTAN1,BCAP31,PHACTR1,B3GLCTA,IRF2BPL,DNMT1,PEX19,ATAD1B,DNM1A,PDHX,MAPTA,AIMP2,DHX30,TAF15,PARS2,RBM28,DYNC1H1,POMT1,KIF5AA,PPARGC1A,TRIT1,MEF2CA,VPS41,R…
female	MEturquoise	HP	Abnormal muscle physiology	HP:0011804	0.0227556	1.64291	2694	381	239	5148	KDM5BB,MKRN1,PCLOA,OPA1,LONP1,SLC2A1B,MAPTB,OTUD5A,YY1B,BAP1,SGPL1,GABRG2,GAS1B,PUF60A,RAB3GAP1,FBXO7,VAC14,CHD2,CRBN,UNC13A,OAT,CNOT3A,GARS1,CACNA1BA,NIPBLB,PTENB,ALDH4A1,ACAD9,CASKA,NCDN,DHCR24,WARS2,TGIF1,MAPK8IP3,ABCA1B,GYG1A,IRF2BP2A,DOCK3,CACNA1DA,POU4F1,DDX3XB,VAPB,SQSTM1,ATL1,STAT5B,EIF2B2,EIF4H,ASXL1,CWC27,ZGC:158254,NOP56,PRKAR1AA,ARID2,RNF13,PNPLA6,KANK1A,GFM1,PTDSS1B,PGAP2,MAP2K2B,ATP…
female	MEturquoise	HP	Abnormal cerebral white matter morphology	HP:0002500	0.0284128	1.54649	1160	381	120	5148	KDM5BB,PCLOA,OPA1,LONP1,SLC2A1B,MAPTB,OTUD5A,YY1B,GABRG2,GAS1B,PUF60A,RAB3GAP1,VAC14,CRBN,CNOT3A,CACNA1BA,PTENB,TXNDC15,CASKA,NCDN,DHCR24,WARS2,TGIF1,MAPK8IP3,DOCK3,DDX3XB,SQSTM1,ATL1,ASXL1,ARID2,RNF13,GFM1,PTDSS1B,MAP2K2B,ARID1AA,NDUFAF3,FGF12B,TRIM8B,SPTAN1,BCAP31,CHMP1A,B3GLCTA,SOX4A,VANGL2,D2HGDH,CNOT1,IRF2BPL,DNMT1,BUB3,DNM1A,PDHX,MAPTA,AIMP2,TMEM260,KANSL1A,FGFR2,ZEB2B,PARS2,DYNC1H1,SATB2,T…
female	MEturquoise	HP	Abnormal emotion/affect behavior	HP:0100851	0.0412291	1.3848	815	381	90	5148	KDM5BB,MKRN1,SLC2A1B,MAPTB,BAP1,GABRG2,GAS1B,PUF60A,CHD2,UNC13A,PAX2A,NIPBLB,ALDH4A1,CASKA,WARS2,TGIF1,DDX3XB,VAPB,SQSTM1,EIF2B2,ASXL1,PRKAR1AA,ARID2,RNF13,ARID1AA,SPARTB,SI:DKEY-178E17.1,TRIM8B,HPRT1,DCTN1A,BCAP31,GABRB1,HLCS,ERAP1B,SOX4A,DNMT1,DNM1A,MAPTA,IL11RA,KANSL1A,TMEM240B,ZEB2B,TAF15,PTPRO,ANLN,DYNC1H1,SATB2,PPARGC1A,SHMT2,AP2M1B,CLCN4,FUZ,SMARCD1,CACNG2A,HDAC4,MANBA,PARK7,ZSWIM6,KIRREL3…
female	MEturquoise	HP	Spasticity	HP:0001257	0.0437925	1.3586	991	381	105	5148	KDM5BB,PCLOA,OPA1,SLC2A1B,MAPTB,GABRG2,GAS1B,RAB3GAP1,FBXO7,CRBN,UNC13A,CACNA1BA,CASKA,NCDN,DHCR24,WARS2,TGIF1,MAPK8IP3,CACNA1DA,DDX3XB,VAPB,SQSTM1,ATL1,EIF2B2,EIF4H,RNF13,PNPLA6,KANK1A,GFM1,SPARTB,NDUFAF3,ERLIN1,FGF12B,TRIM8B,RARS2,HPRT1,DCTN1A,SPTAN1,CHMP1A,PHACTR1,DSTYK,SOX4A,CNOT1,IRF2BPL,DNMT1,PEX19,ATAD1B,DNM1A,PDHX,MAPTA,ZEB2B,TAF15,PARS2,REEP1,DYNC1H1,SATB2,KIF5AA,PPARGC1A,TRIT1,VPS41,SHM…
female	MEturquoise	HP	Sleep disturbance	HP:0002360	0.0449105	1.34765	647	381	75	5148	KDM5BB,MKRN1,SLC2A1B,MAPTB,YY1B,BAP1,GABRG2,GAS1B,PUF60A,FBXO7,CRBN,CNOT3A,NIPBLB,ALDH4A1,CASKA,NCDN,TGIF1,MAPK8IP3,DOCK3,EIF4H,ASXL1,ZGC:158254,SPARTB,ASCL1A,SI:DKEY-178E17.1,TRIM8B,DCTN1A,EMC10,CNOT1,DNMT1,ATAD1B,MAPTA,IL11RA,DHX30,FGFR2,ZEB2B,DYNC1H1,SATB2,POMT1,LMAN2LB,CACNG2A,HUWE1,HDAC4,PARK7,KIRREL3A,DYRK1AA,BICRA,ST3GAL3A,ARNT2,SYNGAP1A,IQSEC2B,SOX2,STUB1,CAMK2B1,MFSD8,WACB,KCNQ5A,RIC1,SL…
female	MEturquoise	HP	Autistic behavior	HP:0000729	0.0483475	1.31563	761	381	85	5148	KDM5BB,MKRN1,SLC2A1B,MAPTB,OTUD5A,YY1B,GABRG2,PUF60A,CHD2,CRBN,CNOT3A,CACNA1BA,NIPBLB,PTENB,ALDH4A1,CASKA,NCDN,MAPK8IP3,DOCK3,DDX3XB,SQSTM1,EIF4H,PRKAR1AA,ARID2,GFM1,PGAP2,ARID1AA,NDUFAF3,SI:DKEY-178E17.1,FGF12B,TRIM8B,GABRB1,PHACTR1,SOX4A,DNM1A,MAPTA,NDUFB3,PHF21AA,KANSL1A,PARS2,SRP54,DYNC1H1,SATB2,POMT1,MEF2CA,AP2M1B,CLCN4,LMAN2LB,SMARCD1,CACNG2A,HUWE1,HDAC4,RREB1B,SMAD4A,PARK7,KIRREL3A,SI:CH10…
male	MEgreenyellow	GO:MF	binding	GO:0005488	0.000111637	3.95219	16633	376	299	24485	CRY2,NR1D2B,PER1B,EIF3C,COPS2,U2AF2B,CELF3A,DNAJB1A,CHD4A,HSP90AA1.2,SRSF5A,NSUN2,KHDRBS1A,HSF1,CNOT7,HSPA4A,HNRNPA3,CIRBPA,IDE,HNRNPK,HSPA5,MED16,EIF4A2,SERPINH1B,FKBP4,PWP2H,HSP70.3,THAP3,TRA2A,CRY3B,SESN3,DNAJB1B,HNRNPL2,DNAJA1,CIARTA,PUM1,CIRBPB,CREB1B,MAPK10,KLHL22,ATF7B,WWP2,RBM17,CELF1,KDM6BB,CARS2,CELF3B,KSR2,SI:CH211-114C17.1,RNF38,MAPRE3A,JARID2B,CHORDC1A,KCND2,SNAP91A,CLPXA,MAPTB,IRX1A…
male	MEgreenyellow	GO:MF	unfolded protein binding	GO:0051082	0.000256396	3.59109	85	376	10	24485	DNAJB1A,HSP90AA1.2,HSPA5,HSP70.3,DNAJB1B,DNAJA1,CLPXA,HSP90B1,MKKS,CALR3B
male	MEgreenyellow	GO:MF	protein binding	GO:0005515	0.00132997	2.87616	7839	376	162	24485	PER1B,EIF3C,COPS2,DNAJB1A,HSP90AA1.2,HSPA5,MED16,FKBP4,PWP2H,HSP70.3,DNAJB1B,DNAJA1,CREB1B,KLHL22,WWP2,KDM6BB,SI:CH211-114C17.1,MAPRE3A,KCND2,SNAP91A,CLPXA,MAPTB,PER2,GPD1L,WDR35,TFEB,NPM1B,ARHGEF9A,CLTCA,NR4A1,WDR31,KDM2BA,MBTD1,DCTN1A,IPO8,ZMYND11,SH3KBP1,MEF2D,SUDS3,PCLOA,MYOM1A,ASPN,GNAI2B,HSP90B1,KDM1A,TRIM3A,FARP2,ARHGEF10LA,SASH1A,ZBTB21,HER6,ANKFY1,KMT2CA,WWC3,RIMS2A,DNAJC7,SI:CH211-14A17…
male	MEgreenyellow	GO:MF	microtubule plus-end binding	GO:0051010	0.0230055	1.63817	15	376	4	24485	MAPRE3A,DCTN1A,CLASP1A,CLIP1A
male	MEgreenyellow	GO:MF	chromatin binding	GO:0003682	0.0398051	1.40006	180	376	11	24485	KDM6BB,PER2,NPM1B,MBTD1,KDM1A,TMPOA,PHC2B,EWSR1A,ATAD2B,L3MBTL1B,PHF21AA
male	MEgreenyellow	GO:BP	negative regulation of transcription, DNA-templated	GO:0045892	1.15066e-05	4.93905	317	320	21	21828	CRY2,NR1D2B,PER1B,PPHLN1,SI:CH211-132B12.7,CRY3B,WWP2,NR1D1,PER2,GATAD2AB,CTBP2A,MBTD1,SUDS3,KDM1A,NAB1B,PHC2B,SEMA4D,CBX4,L3MBTL1B,CC2D1B,PHF21AA
male	MEgreenyellow	GO:BP	negative regulation of RNA biosynthetic process	GO:1902679	1.15066e-05	4.93905	317	320	21	21828	CRY2,NR1D2B,PER1B,PPHLN1,SI:CH211-132B12.7,CRY3B,WWP2,NR1D1,PER2,GATAD2AB,CTBP2A,MBTD1,SUDS3,KDM1A,NAB1B,PHC2B,SEMA4D,CBX4,L3MBTL1B,CC2D1B,PHF21AA
male	MEgreenyellow	GO:BP	negative regulation of nucleic acid-templated transcription	GO:1903507	1.15066e-05	4.93905	317	320	21	21828	CRY2,NR1D2B,PER1B,PPHLN1,SI:CH211-132B12.7,CRY3B,WWP2,NR1D1,PER2,GATAD2AB,CTBP2A,MBTD1,SUDS3,KDM1A,NAB1B,PHC2B,SEMA4D,CBX4,L3MBTL1B,CC2D1B,PHF21AA
male	MEgreenyellow	GO:BP	negative regulation of RNA metabolic process	GO:0051253	2.8516e-05	4.54491	334	320	21	21828	CRY2,NR1D2B,PER1B,PPHLN1,SI:CH211-132B12.7,CRY3B,WWP2,NR1D1,PER2,GATAD2AB,CTBP2A,MBTD1,SUDS3,KDM1A,NAB1B,PHC2B,SEMA4D,CBX4,L3MBTL1B,CC2D1B,PHF21AA
male	MEgreenyellow	GO:BP	negative regulation of nucleobase-containing compound metabolic process	GO:0045934	0.000102341	3.98995	360	320	21	21828	CRY2,NR1D2B,PER1B,PPHLN1,SI:CH211-132B12.7,CRY3B,WWP2,NR1D1,PER2,GATAD2AB,CTBP2A,MBTD1,SUDS3,KDM1A,NAB1B,PHC2B,SEMA4D,CBX4,L3MBTL1B,CC2D1B,PHF21AA
male	MEgreenyellow	GO:BP	response to temperature stimulus	GO:0009266	0.000237983	3.62345	44	320	8	21828	CRY2,PER1B,HSP90AA1.2,HSF1,DNAJA1,CIRBPB,PER2,SLC27A1A
male	MEgreenyellow	GO:BP	protein folding	GO:0006457	0.000272521	3.5646	146	320	13	21828	DNAJB1A,HSP90AA1.2,HSPA5,FKBP4,HSP70.3,DNAJB1B,DNAJA1,CLPXA,HSP90B1,DNAJC3A,MKKS,CALR3B,PDIA7
male	MEgreenyellow	GO:BP	negative regulation of cellular biosynthetic process	GO:0031327	0.000299569	3.5235	418	320	22	21828	CRY2,NR1D2B,PER1B,PPHLN1,SI:CH211-132B12.7,CRY3B,WWP2,NR1D1,PER2,GATAD2AB,CTBP2A,MBTD1,SUDS3,KDM1A,NAB1B,SLC27A1A,PHC2B,SEMA4D,CBX4,L3MBTL1B,CC2D1B,PHF21AA
male	MEgreenyellow	GO:BP	negative regulation of biosynthetic process	GO:0009890	0.000312018	3.50582	419	320	22	21828	CRY2,NR1D2B,PER1B,PPHLN1,SI:CH211-132B12.7,CRY3B,WWP2,NR1D1,PER2,GATAD2AB,CTBP2A,MBTD1,SUDS3,KDM1A,NAB1B,SLC27A1A,PHC2B,SEMA4D,CBX4,L3MBTL1B,CC2D1B,PHF21AA
male	MEgreenyellow	GO:BP	negative regulation of macromolecule biosynthetic process	GO:0010558	0.000716357	3.14487	405	320	21	21828	CRY2,NR1D2B,PER1B,PPHLN1,SI:CH211-132B12.7,CRY3B,WWP2,NR1D1,PER2,GATAD2AB,CTBP2A,MBTD1,SUDS3,KDM1A,NAB1B,PHC2B,SEMA4D,CBX4,L3MBTL1B,CC2D1B,PHF21AA
male	MEgreenyellow	GO:BP	regulation of circadian rhythm	GO:0042752	0.0014417	2.84113	25	320	6	21828	CRY2,PER1B,SI:CH211-132B12.7,CRY3B,NR1D1,PER2
male	MEgreenyellow	GO:BP	regulation of RNA splicing	GO:0043484	0.00228122	2.64183	78	320	9	21828	KHDRBS1A,CIRBPA,HNRNPK,TRA2A,CIRBPB,RBM17,CELF3B,PUF60A,HNRNPH3
male	MEgreenyellow	GO:BP	regulation of mRNA splicing, via spliceosome	GO:0048024	0.00750406	2.1247	49	320	7	21828	KHDRBS1A,CIRBPA,HNRNPK,TRA2A,CIRBPB,CELF3B,PUF60A
male	MEgreenyellow	GO:BP	regulation of RNA metabolic process	GO:0051252	0.0132777	1.87688	2886	320	70	21828	CRY2,NR1D2B,PER1B,KHDRBS1A,HSF1,PPHLN1,CIRBPA,SI:CH211-132B12.7,HNRNPK,MED16,TRA2A,CRY3B,PUM1,CIRBPB,CREB1B,ATF7B,RYBPA,KAT5B,WWP2,RBM17,CELF3B,IRX1A,NR1D1,PER2,SS18,TFEB,NPM1B,PUF60A,GATAD2AB,NR4A1,CTBP2A,KDM2BA,MBTD1,MEF2D,SUDS3,SI:DKEY-18A10.3,KDM1A,NFE2L1B,SI:CH1073-224N8.1,HER6,TCF7L2,NAB1B,KMT2CA,WWC3,POU3F2A,FOSAB,BCL11BA,PHC2B,TGIF1,IGF2BP2A,HSF2,DACHD,POU3F3A,FER,SI:CH73-52F15.5,MED11,SE…
male	MEgreenyellow	GO:BP	regulation of nucleobase-containing compound metabolic process	GO:0019219	0.0176565	1.7531	2966	320	71	21828	CRY2,NR1D2B,PER1B,KHDRBS1A,HSF1,PPHLN1,CIRBPA,SI:CH211-132B12.7,HNRNPK,MED16,TRA2A,CRY3B,PUM1,CIRBPB,CREB1B,ATF7B,RYBPA,KAT5B,WWP2,RBM17,SI:DKEY-190G11.3,CELF3B,IRX1A,NR1D1,PER2,SS18,TFEB,NPM1B,PUF60A,GATAD2AB,NR4A1,CTBP2A,KDM2BA,MBTD1,MEF2D,SUDS3,SI:DKEY-18A10.3,KDM1A,NFE2L1B,SI:CH1073-224N8.1,HER6,TCF7L2,NAB1B,KMT2CA,WWC3,POU3F2A,FOSAB,BCL11BA,PHC2B,TGIF1,IGF2BP2A,HSF2,DACHD,POU3F3A,FER,SI:CH73…
male	MEgreenyellow	GO:BP	organelle organization	GO:0006996	0.0244227	1.61221	2126	320	55	21828	PPHLN1,PWP2H,MAPRE3A,CHORDC1A,SNAP91A,MAPTB,WDR35,NPM1B,MBTD1,DCTN1A,MEF2D,DYSF,KDM1A,TMPOA,ZFYVE27,KMT2CA,CNN3B,GTF2F2A,RER1,COG7,CAMSAP1A,DST,KCTD17,SI:CH73-103B11.2,BAIAP2B,PICALMB,FER,EWSR1A,FLNCB,EML1,TPM1,STX3A,PACSIN2,EPB41L3A,TNNT1,L3MBTL1B,MIEF2,VTI1A,ERCC3,TWNK,MKKS,PPP1R9ALA,CLASP1A,ACTN1,TPM3,CLIP1A,TTN.2,TUBD1,TIMM23B,PACSIN3,PRPH,ADCK1,CCDC88AA,TUBGCP3,IFT80
male	MEgreenyellow	GO:BP	circadian regulation of gene expression	GO:0032922	0.0259682	1.58556	40	320	6	21828	CRY2,PER1B,CRY3B,CIARTA,NR1D1,PER2
male	MEgreenyellow	GO:BP	negative regulation of transcription by RNA polymerase II	GO:0000122	0.0274738	1.56108	160	320	11	21828	NR1D2B,PER1B,WWP2,NR1D1,PER2,GATAD2AB,SUDS3,KDM1A,SEMA4D,CC2D1B,PHF21AA
male	MEgreenyellow	GO:BP	rhythmic process	GO:0048511	0.0358641	1.44534	109	320	9	21828	CRY2,PER1B,SI:CH211-132B12.7,CRY3B,CIARTA,MAPK10,NR1D1,PER2,PSPC1
male	MEgreenyellow	GO:BP	regulation of mRNA processing	GO:0050684	0.0365066	1.43763	62	320	7	21828	KHDRBS1A,CIRBPA,HNRNPK,TRA2A,CIRBPB,CELF3B,PUF60A
male	MEgreenyellow	GO:BP	regulation of gene expression	GO:0010468	0.0493498	1.30671	3515	320	79	21828	CRY2,NR1D2B,PER1B,KHDRBS1A,HSF1,PPHLN1,CNOT7,CIRBPA,SI:CH211-132B12.7,HNRNPK,MED16,TRA2A,CRY3B,CIARTA,PUM1,CIRBPB,CREB1B,ATF7B,RYBPA,KAT5B,WWP2,RBM17,KDM6BB,CELF3B,IRX1A,NR1D1,PER2,SS18,CNOT1,TFEB,NPM1B,PUF60A,GATAD2AB,NR4A1,CTBP2A,KDM2BA,MBTD1,MEF2D,SUDS3,SI:DKEY-18A10.3,KDM1A,NFE2L1B,HNRNPABA,ZBTB21,SI:CH1073-224N8.1,HER6,TCF7L2,NAB1B,KMT2CA,WWC3,POU3F2A,FOSAB,EIF2AK4,BCL11BA,PHC2B,TGIF1,IGF2BP…
male	MEgreenyellow	GO:CC	intracellular anatomical structure	GO:0005622	8.32041e-11	10.0799	12687	306	247	20566	CRY2,NR1D2B,PER1B,EIF3C,COPS2,U2AF2B,ST8SIA5,HSP90AA1.2,SRSF5A,NSUN2,KHDRBS1A,HSF1,PPHLN1,CNOT7,HSPA4A,CIRBPA,IDE,SI:CH211-132B12.7,HNRNPK,HSPA5,MED16,SERPINH1B,FKBP4,PWP2H,HSP70.3,TRA2A,CRY3B,SESN3,HNRNPL2,PUM1,CIRBPB,CREB1B,MAPK10,ATF7B,KAT5B,WWP2,RBM17,KDM6BB,CARS2,SI:DKEY-190G11.3,CELF3B,KSR2,MAPRE3A,SNAP91A,CLPXA,MAPTB,PDIA6,IRX1A,SRSF5B,NR1D1,PER2,SS18,MYLIPB,GPD1L,SSR1,CNOT1,WDR35,TFEB,RCA…
male	MEgreenyellow	GO:CC	cytoplasm	GO:0005737	2.45413e-09	8.6101	6733	306	157	20566	CRY2,PER1B,EIF3C,ST8SIA5,HSP90AA1.2,SRSF5A,NSUN2,HSPA4A,IDE,HNRNPK,HSPA5,SERPINH1B,FKBP4,HSP70.3,CRY3B,SESN3,PUM1,CIRBPB,MAPK10,WWP2,CARS2,SI:DKEY-190G11.3,CELF3B,KSR2,MAPRE3A,SNAP91A,CLPXA,MAPTB,PDIA6,PER2,GPD1L,SSR1,CNOT1,WDR35,RCAN1A,NPM1B,GDI2,ARHGEF9A,PISD,CLTCA,SIK1,DCTN1A,IPO8,PDK2B,DYSF,AFG3L2,PLEKHA8,TCIRG1A,SCAMP2,HSP90B1,TMEM87B,NFE2L1B,HNRNPABA,CPOX,SI:DKEY-197C15.6,DYRK4,WWC3,CTAGE5,…
male	MEgreenyellow	GO:CC	intracellular membrane-bounded organelle	GO:0043231	2.18313e-08	7.66092	8112	306	176	20566	CRY2,NR1D2B,PER1B,COPS2,U2AF2B,ST8SIA5,HSP90AA1.2,SRSF5A,NSUN2,KHDRBS1A,HSF1,PPHLN1,CNOT7,HSPA4A,CIRBPA,IDE,SI:CH211-132B12.7,HNRNPK,HSPA5,MED16,SERPINH1B,PWP2H,HSP70.3,TRA2A,CRY3B,SESN3,HNRNPL2,CIRBPB,CREB1B,MAPK10,ATF7B,KAT5B,WWP2,RBM17,KDM6BB,SI:DKEY-190G11.3,CELF3B,SNAP91A,CLPXA,PDIA6,IRX1A,SRSF5B,NR1D1,PER2,SS18,SSR1,CNOT1,TFEB,RCAN1A,NPM1B,PUF60A,GATAD2AB,PISD,CLTCA,NR4A1,CTBP2A,MBTD1,DCTN1…
male	MEgreenyellow	GO:CC	membrane-bounded organelle	GO:0043227	7.13258e-08	7.14675	8346	306	178	20566	CRY2,NR1D2B,PER1B,COPS2,U2AF2B,ST8SIA5,HSP90AA1.2,SRSF5A,NSUN2,KHDRBS1A,HSF1,PPHLN1,CNOT7,HSPA4A,CIRBPA,IDE,SI:CH211-132B12.7,HNRNPK,HSPA5,MED16,SERPINH1B,PWP2H,HSP70.3,TRA2A,CRY3B,SESN3,HNRNPL2,CIRBPB,CREB1B,MAPK10,ATF7B,KAT5B,WWP2,RBM17,KDM6BB,SI:DKEY-190G11.3,CELF3B,SNAP91A,CLPXA,PDIA6,IRX1A,SRSF5B,NR1D1,PER2,SS18,SSR1,CNOT1,WDR35,TFEB,RCAN1A,NPM1B,PUF60A,GATAD2AB,PISD,CLTCA,NR4A1,CTBP2A,MBTD1…
male	MEgreenyellow	GO:CC	organelle	GO:0043226	1.07172e-06	5.96992	10781	306	210	20566	CRY2,NR1D2B,PER1B,COPS2,U2AF2B,ST8SIA5,HSP90AA1.2,SRSF5A,NSUN2,KHDRBS1A,HSF1,PPHLN1,CNOT7,HSPA4A,CIRBPA,IDE,SI:CH211-132B12.7,HNRNPK,HSPA5,MED16,SERPINH1B,PWP2H,HSP70.3,TRA2A,CRY3B,SESN3,HNRNPL2,CIRBPB,CREB1B,MAPK10,ATF7B,KAT5B,WWP2,RBM17,KDM6BB,SI:DKEY-190G11.3,CELF3B,MAPRE3A,KCND2,SNAP91A,CLPXA,MAPTB,PDIA6,IRX1A,SRSF5B,NR1D1,PER2,SS18,MYLIPB,SSR1,CNOT1,WDR35,TFEB,RCAN1A,NPM1B,PUF60A,GATAD2AB,AR…
male	MEgreenyellow	GO:CC	intracellular organelle	GO:0043229	1.10998e-06	5.95469	10573	306	207	20566	CRY2,NR1D2B,PER1B,COPS2,U2AF2B,ST8SIA5,HSP90AA1.2,SRSF5A,NSUN2,KHDRBS1A,HSF1,PPHLN1,CNOT7,HSPA4A,CIRBPA,IDE,SI:CH211-132B12.7,HNRNPK,HSPA5,MED16,SERPINH1B,PWP2H,HSP70.3,TRA2A,CRY3B,SESN3,HNRNPL2,CIRBPB,CREB1B,MAPK10,ATF7B,KAT5B,WWP2,RBM17,KDM6BB,SI:DKEY-190G11.3,CELF3B,MAPRE3A,SNAP91A,CLPXA,MAPTB,PDIA6,IRX1A,SRSF5B,NR1D1,PER2,SS18,MYLIPB,SSR1,CNOT1,WDR35,TFEB,RCAN1A,NPM1B,PUF60A,GATAD2AB,PISD,CLT…
male	MEgreenyellow	GO:CC	nucleus	GO:0005634	0.000292002	3.53461	5331	306	117	20566	CRY2,NR1D2B,PER1B,COPS2,U2AF2B,HSP90AA1.2,SRSF5A,NSUN2,KHDRBS1A,HSF1,PPHLN1,CNOT7,HSPA4A,CIRBPA,SI:CH211-132B12.7,HNRNPK,HSPA5,MED16,PWP2H,HSP70.3,TRA2A,CRY3B,SESN3,HNRNPL2,CIRBPB,CREB1B,MAPK10,ATF7B,KAT5B,WWP2,RBM17,KDM6BB,CELF3B,IRX1A,SRSF5B,NR1D1,PER2,SS18,CNOT1,TFEB,RCAN1A,NPM1B,PUF60A,GATAD2AB,NR4A1,CTBP2A,MBTD1,DCTN1A,PSPC1,IPO8,MEF2D,SUDS3,ZGC:110224,KDM1A,ZGC:153292,TMPOA,NFE2L1B,HNRNPABA…
male	MEgreenyellow	GO:CC	nucleoplasm	GO:0005654	0.00051542	3.28784	543	306	24	20566	U2AF2B,PPHLN1,HNRNPK,CIRBPB,KAT5B,RBM17,KDM6BB,SRSF5B,NPM1B,GATAD2AB,PSPC1,SUDS3,ZGC:153292,HNRNPABA,KMT2CA,GTF2F2A,CPSF6,DTX2,BAIAP2B,HNRNPH3,AKIP1,RPRD1B,AFF4,PHF21AA
male	MEgreenyellow	GO:CC	cytoskeleton	GO:0005856	0.000574459	3.24074	1180	306	39	20566	MAPRE3A,MAPTB,MYLIPB,WDR35,NPM1B,CLTCA,DCTN1A,FARP2,DYRK4,RIMS2A,PTPN4B,CNN3B,CAMSAP1A,DST,SI:CH73-103B11.2,BAIAP2B,TUBB2,CDK5RAP2,EML1,TPM1,EPB41L3A,TNNT1,MKKS,VIML,PPP1R9ALA,CLASP1A,ACTN1,TPM3,CLIP1A,TTN.2,TUBD1,NF2A,ILK,ZFYVE19,PRPH,CCDC88AA,FRMPD4,TUBGCP3,IFT80
male	MEgreenyellow	GO:CC	intracellular organelle lumen	GO:0070013	0.00958575	2.01837	1190	306	36	20566	U2AF2B,PPHLN1,IDE,HNRNPK,HSPA5,PWP2H,CIRBPB,KAT5B,RBM17,KDM6BB,CLPXA,PDIA6,SRSF5B,NPM1B,GATAD2AB,PSPC1,PDK2B,SUDS3,ZGC:153292,HNRNPABA,CPOX,KMT2CA,GTF2F2A,CPSF6,P4HA1A,DTX2,BAIAP2B,HNRNPH3,AKIP1,UTP25,RPRD1B,TENT4B,AFF4,PHF21AA,PDIA7,ALAS2
male	MEgreenyellow	GO:CC	membrane-enclosed lumen	GO:0031974	0.00958575	2.01837	1190	306	36	20566	U2AF2B,PPHLN1,IDE,HNRNPK,HSPA5,PWP2H,CIRBPB,KAT5B,RBM17,KDM6BB,CLPXA,PDIA6,SRSF5B,NPM1B,GATAD2AB,PSPC1,PDK2B,SUDS3,ZGC:153292,HNRNPABA,CPOX,KMT2CA,GTF2F2A,CPSF6,P4HA1A,DTX2,BAIAP2B,HNRNPH3,AKIP1,UTP25,RPRD1B,TENT4B,AFF4,PHF21AA,PDIA7,ALAS2
male	MEgreenyellow	GO:CC	organelle lumen	GO:0043233	0.00958575	2.01837	1190	306	36	20566	U2AF2B,PPHLN1,IDE,HNRNPK,HSPA5,PWP2H,CIRBPB,KAT5B,RBM17,KDM6BB,CLPXA,PDIA6,SRSF5B,NPM1B,GATAD2AB,PSPC1,PDK2B,SUDS3,ZGC:153292,HNRNPABA,CPOX,KMT2CA,GTF2F2A,CPSF6,P4HA1A,DTX2,BAIAP2B,HNRNPH3,AKIP1,UTP25,RPRD1B,TENT4B,AFF4,PHF21AA,PDIA7,ALAS2
male	MEgreenyellow	KEGG	Protein processing in endoplasmic reticulum	KEGG:04141	0.000505898	3.29594	161	103	13	5305	DNAJB1A,HSP90AA1.2,HSPA5,HSP70.3,DNAJB1B,DNAJA1,MAPK10,PDIA6,SSR1,UBXN4,RAD23AA,CALR3B,PDIA7
male	MEgreenyellow	KEGG	Spliceosome	KEGG:03040	0.0188641	1.72436	118	103	9	5305	U2AF2B,SRSF5A,HNRNPA3,HNRNPK,HSP70.3,TRA2A,RBM17,SRSF5B,PUF60A
male	MEgreenyellow	REAC	TP53 regulates transcription of additional cell cycle genes whose exact role in the p53 pathway remain uncertain	REAC:R-DRE-6804115	0.0201913	1.69484	22	148	5	7340	CNOT7,NPM1B,BTG2,BTG1,CDC25D
male	MEred	GO:MF	catalytic activity	GO:0003824	0.00355522	2.44913	7612	697	270	24485	SI:DKEY-19E4.5,ASPH,CUL4B,PDP1,SI:CH211-195B13.1,DDX3XA,CS,DHX29,ATAD1A,RAB39BA,BACE1,ADSS2,RAB30,VPS4B,PDHA1A,ARL8A,TMTC3,IDH3G,SYVN1,KDSR,CH25HL2,CHKA,DPP9,GLYR1,PPP3CCB,TMEM62,SEPT15,SAT1B,PDK4,CEPT1B,OCRL,CDK5,CDK14,ELOVL4A,CSNK1E,CERS1,PCYT1BA,ZMP:0000000662,CASKA,OPA1,OGG1,OXSR1A,NAT16,STK25A,KCNAB2A,PYGMB,ZDHHC20B,SPPL2,SACM1LA,HERC3,ST6GAL1,RAB11A,RDH10A,ACSL4A,KIF21A,CTDSPLB,PREPL,SI:DKE…
male	MEred	GO:MF	transferase activity	GO:0016740	0.00632807	2.19873	3290	697	133	24485	CUL4B,SI:CH211-195B13.1,CS,TMTC3,SYVN1,CHKA,SAT1B,PDK4,CEPT1B,CDK5,CDK14,ELOVL4A,CSNK1E,CERS1,PCYT1BA,ZMP:0000000662,CASKA,OXSR1A,NAT16,STK25A,PYGMB,ZDHHC20B,HERC3,ST6GAL1,FGFRL1B,PDK3A,POMGNT1,CUL5A,ST8SIA3,ST6GALNAC4,OXCT1A,EXT2,ZGC:154046,EPHB4B,CERS5,UGCG,NMT1A,SI:DKEY-172J4.3,CAMK2D2,SYK,IP6K2B,SIRT1,UBE2B,MAPK9,SULT4A1,PNP6,ZDHHC17,CERK,HK1,UBE2D4,MARK3B,TNIKA,SI:DKEY-181M9.8,MAPK8A,MAPK1,Z…
male	MEred	GO:MF	purine ribonucleoside triphosphate binding	GO:0035639	0.0105982	1.97477	2753	697	114	24485	SI:CH211-195B13.1,MYO1HA,DDX3XA,DHX29,ATAD1A,RAB39BA,ADSS2,RAB30,VPS4B,ARL8A,SEPT15,PDK4,CDK5,CDK14,CSNK1E,CASKA,OPA1,OXSR1A,STK25A,KIF5BB,RAB11A,KIF21A,PDK3A,CHD1,MFN2,MBD3B,RAB3AB,RAB10,EPHB4B,MYO10,SI:DKEY-172J4.3,CAMK2D2,SYK,UBE2B,MAPK9,ATP1A1B,GNAL2,HK1,RAB41,UBE2D4,MARK3B,TNIKA,MYH9B,MAPK8A,MAPK1,RAB14,MLH1,KIF13BB,CNTN1B,MYO16,ATP2B3B,ACVR1BB,ACVR1BA,MCM7,MYO1CA,PIP5K1CA,MAK,NUAK1A,LIMK1A,…
male	MEred	GO:MF	adenyl nucleotide binding	GO:0030554	0.0142008	1.84769	2124	697	92	24485	SI:CH211-195B13.1,MYO1HA,DDX3XA,DHX29,ATAD1A,VPS4B,PDK4,CDK5,CDK14,CSNK1E,CASKA,OXSR1A,STK25A,PRKAR1B,KIF5BB,KIF21A,PDK3A,CHD1,MBD3B,EPHB4B,MYO10,SI:DKEY-172J4.3,CAMK2D2,GRPEL2,SYK,UBE2B,MAPK9,ATP1A1B,HK1,UBE2D4,MARK3B,TNIKA,MYH9B,MAPK8A,MAPK1,MLH1,KIF13BB,CNTN1B,MYO16,ATP2B3B,ACVR1BB,ACVR1BA,MCM7,MYO1CA,PIP5K1CA,MAK,NUAK1A,LIMK1A,KIF1AB,CAMK1A,KIF1AA,RECQL,CCT8,DAPK3,CAMK2B1,GSK3BB,BRSK2A,SI:DKE…
male	MEred	GO:MF	purine nucleotide binding	GO:0017076	0.014293	1.84488	2832	697	116	24485	SI:CH211-195B13.1,MYO1HA,DDX3XA,DHX29,ATAD1A,RAB39BA,ADSS2,RAB30,VPS4B,ARL8A,SEPT15,PDK4,CDK5,CDK14,CSNK1E,CASKA,OPA1,OXSR1A,STK25A,PRKAR1B,KIF5BB,RAB11A,KIF21A,PDK3A,CHD1,MFN2,MBD3B,RAB3AB,RAB10,EPHB4B,MYO10,SI:DKEY-172J4.3,CAMK2D2,GRPEL2,SYK,UBE2B,MAPK9,ATP1A1B,GNAL2,HK1,RAB41,UBE2D4,MARK3B,TNIKA,MYH9B,MAPK8A,MAPK1,RAB14,MLH1,KIF13BB,CNTN1B,MYO16,ATP2B3B,ACVR1BB,ACVR1BA,MCM7,MYO1CA,PIP5K1CA,MAK…
male	MEred	GO:MF	purine ribonucleotide binding	GO:0032555	0.0151827	1.81865	2806	697	115	24485	SI:CH211-195B13.1,MYO1HA,DDX3XA,DHX29,ATAD1A,RAB39BA,ADSS2,RAB30,VPS4B,ARL8A,SEPT15,PDK4,CDK5,CDK14,CSNK1E,CASKA,OPA1,OXSR1A,STK25A,PRKAR1B,KIF5BB,RAB11A,KIF21A,PDK3A,CHD1,MFN2,MBD3B,RAB3AB,RAB10,EPHB4B,MYO10,SI:DKEY-172J4.3,CAMK2D2,SYK,UBE2B,MAPK9,ATP1A1B,GNAL2,HK1,RAB41,UBE2D4,MARK3B,TNIKA,MYH9B,MAPK8A,MAPK1,RAB14,MLH1,KIF13BB,CNTN1B,MYO16,ATP2B3B,ACVR1BB,ACVR1BA,MCM7,MYO1CA,PIP5K1CA,MAK,NUAK1A…
male	MEred	GO:MF	ribonucleotide binding	GO:0032553	0.0190677	1.7197	2821	697	115	24485	SI:CH211-195B13.1,MYO1HA,DDX3XA,DHX29,ATAD1A,RAB39BA,ADSS2,RAB30,VPS4B,ARL8A,SEPT15,PDK4,CDK5,CDK14,CSNK1E,CASKA,OPA1,OXSR1A,STK25A,PRKAR1B,KIF5BB,RAB11A,KIF21A,PDK3A,CHD1,MFN2,MBD3B,RAB3AB,RAB10,EPHB4B,MYO10,SI:DKEY-172J4.3,CAMK2D2,SYK,UBE2B,MAPK9,ATP1A1B,GNAL2,HK1,RAB41,UBE2D4,MARK3B,TNIKA,MYH9B,MAPK8A,MAPK1,RAB14,MLH1,KIF13BB,CNTN1B,MYO16,ATP2B3B,ACVR1BB,ACVR1BA,MCM7,MYO1CA,PIP5K1CA,MAK,NUAK1A…
male	MEred	GO:MF	ATP binding	GO:0005524	0.0191181	1.71856	2083	697	90	24485	SI:CH211-195B13.1,MYO1HA,DDX3XA,DHX29,ATAD1A,VPS4B,PDK4,CDK5,CDK14,CSNK1E,CASKA,OXSR1A,STK25A,KIF5BB,KIF21A,PDK3A,CHD1,MBD3B,EPHB4B,MYO10,SI:DKEY-172J4.3,CAMK2D2,SYK,UBE2B,MAPK9,ATP1A1B,HK1,UBE2D4,MARK3B,TNIKA,MYH9B,MAPK8A,MAPK1,MLH1,KIF13BB,CNTN1B,MYO16,ATP2B3B,ACVR1BB,ACVR1BA,MCM7,MYO1CA,PIP5K1CA,MAK,NUAK1A,LIMK1A,KIF1AB,CAMK1A,KIF1AA,RECQL,CCT8,DAPK3,CAMK2B1,GSK3BB,BRSK2A,SI:DKEY-28B4.8,PKMA,T…
male	MEred	GO:MF	adenyl ribonucleotide binding	GO:0032559	0.0212038	1.67359	2118	697	91	24485	SI:CH211-195B13.1,MYO1HA,DDX3XA,DHX29,ATAD1A,VPS4B,PDK4,CDK5,CDK14,CSNK1E,CASKA,OXSR1A,STK25A,PRKAR1B,KIF5BB,KIF21A,PDK3A,CHD1,MBD3B,EPHB4B,MYO10,SI:DKEY-172J4.3,CAMK2D2,SYK,UBE2B,MAPK9,ATP1A1B,HK1,UBE2D4,MARK3B,TNIKA,MYH9B,MAPK8A,MAPK1,MLH1,KIF13BB,CNTN1B,MYO16,ATP2B3B,ACVR1BB,ACVR1BA,MCM7,MYO1CA,PIP5K1CA,MAK,NUAK1A,LIMK1A,KIF1AB,CAMK1A,KIF1AA,RECQL,CCT8,DAPK3,CAMK2B1,GSK3BB,BRSK2A,SI:DKEY-28B4.…
male	MEred	GO:MF	phosphotransferase activity, alcohol group as acceptor	GO:0016773	0.0234847	1.62921	1248	697	60	24485	SI:CH211-195B13.1,CHKA,PDK4,CDK5,CDK14,CSNK1E,CASKA,OXSR1A,STK25A,FGFRL1B,PDK3A,EPHB4B,SI:DKEY-172J4.3,CAMK2D2,SYK,MAPK9,CERK,HK1,MARK3B,TNIKA,MAPK8A,MAPK1,ACVR1BB,ACVR1BA,PIP5K1CA,MAK,NUAK1A,LIMK1A,CAMK1A,ADKB,DAPK3,CAMK2B1,GSK3BB,NRP1A,BRSK2A,PKMA,TNIKB,MAPK8B,CSNK1G2B,AKT3A,MAP3K3,EPHA3,NEK4,CLK4B,DSTYK,CAMK2G2,SIK2B,NADK2,DGKH,TRIB1,EPHA4B,OXSR1B,MAPK14B,PRKX,PANK1A,DCLK1A,PRKCBA,NRBP1,PANK1B…
male	MEred	GO:MF	ion binding	GO:0043167	0.0235537	1.62794	6371	697	227	24485	PDP1,SI:CH211-195B13.1,MYO1HA,DDX3XA,DHX29,ATAD1A,RAB39BA,ADSS2,RAB30,VPS4B,EDIL3B,ARL8A,IDH3G,CH25HL2,PPP3CCB,SEPT15,SAT1B,PDK4,PPP3R1A,CALR3A,GSNA,CDK5,CDK14,CSNK1E,REPS2,PCYT1BA,ZMP:0000000662,CASKA,OPA1,OXSR1A,CDH10A,STK25A,PRKAR1B,PYGMB,HGS,KIF5BB,CALN1,RAB11A,KIF21A,TRAF7,PDK3A,BCO2A,CHD1,SYT1A,MFN2,PCDH18A,DIPK1B,MBD3B,POMGNT1,SREK1IP1,RAB3AB,RAB10,PHC2A,ZFYVE9B,EPHB4B,MYO10,CPE,SI:DKEY-17…
male	MEred	GO:MF	carbohydrate derivative binding	GO:0097367	0.0264396	1.57774	2994	697	120	24485	SI:CH211-195B13.1,MYO1HA,DDX3XA,DHX29,ATAD1A,RAB39BA,ADSS2,RAB30,VPS4B,ARL8A,SEPT15,PDK4,CDK5,CDK14,CSNK1E,CASKA,OPA1,OXSR1A,STK25A,PRKAR1B,KIF5BB,RAB11A,KIF21A,PDK3A,CHD1,MFN2,MBD3B,RAB3AB,RAB10,EPHB4B,MYO10,SI:DKEY-172J4.3,CAMK2D2,SYK,UBE2B,MAPK9,ATP1A1B,GNAL2,HK1,RAB41,UBE2D4,MARK3B,TNIKA,MYH9B,MAPK8A,MAPK1,RAB14,MLH1,KIF13BB,CNTN1B,MYO16,ATP2B3B,ACVR1BB,ACVR1BA,MCM7,MYO1CA,PIP5K1CA,MAK,NUAK1A…
male	MEred	GO:MF	nucleoside phosphate binding	GO:1901265	0.031483	1.50192	3067	697	122	24485	SI:CH211-195B13.1,MYO1HA,DDX3XA,DHX29,ATAD1A,RAB39BA,ADSS2,RAB30,VPS4B,ARL8A,IDH3G,GLYR1,SEPT15,PDK4,CDK5,CDK14,CSNK1E,CASKA,OPA1,OXSR1A,STK25A,PRKAR1B,KIF5BB,RAB11A,KIF21A,PDK3A,CHD1,MFN2,MBD3B,RAB3AB,RAB10,EPHB4B,MYO10,SI:DKEY-172J4.3,CAMK2D2,GRPEL2,SYK,SIRT1,UBE2B,MAPK9,ATP1A1B,GNAL2,HK1,RAB41,UBE2D4,MARK3B,TNIKA,MYH9B,MAPK8A,MAPK1,RAB14,MLH1,KIF13BB,CNTN1B,MYO16,ATP2B3B,ACVR1BB,ACVR1BA,MCM7,M…
male	MEred	GO:MF	nucleotide binding	GO:0000166	0.031483	1.50192	3067	697	122	24485	SI:CH211-195B13.1,MYO1HA,DDX3XA,DHX29,ATAD1A,RAB39BA,ADSS2,RAB30,VPS4B,ARL8A,IDH3G,GLYR1,SEPT15,PDK4,CDK5,CDK14,CSNK1E,CASKA,OPA1,OXSR1A,STK25A,PRKAR1B,KIF5BB,RAB11A,KIF21A,PDK3A,CHD1,MFN2,MBD3B,RAB3AB,RAB10,EPHB4B,MYO10,SI:DKEY-172J4.3,CAMK2D2,GRPEL2,SYK,SIRT1,UBE2B,MAPK9,ATP1A1B,GNAL2,HK1,RAB41,UBE2D4,MARK3B,TNIKA,MYH9B,MAPK8A,MAPK1,RAB14,MLH1,KIF13BB,CNTN1B,MYO16,ATP2B3B,ACVR1BB,ACVR1BA,MCM7,M…
male	MEred	GO:MF	beta-catenin binding	GO:0008013	0.0317566	1.49817	26	697	6	24485	TCF7L1B,LZTS2A,BCL9,GSK3BB,CAV1,MED12
male	MEred	GO:MF	transferase activity, transferring phosphorus-containing groups	GO:0016772	0.0343405	1.46419	1515	697	69	24485	SI:CH211-195B13.1,CHKA,PDK4,CEPT1B,CDK5,CDK14,CSNK1E,PCYT1BA,CASKA,OXSR1A,STK25A,FGFRL1B,PDK3A,EPHB4B,SI:DKEY-172J4.3,CAMK2D2,SYK,IP6K2B,MAPK9,CERK,HK1,MARK3B,TNIKA,MAPK8A,MAPK1,NMNAT2,ACVR1BB,ACVR1BA,PIP5K1CA,MAK,POLR2L,NUAK1A,LIMK1A,CAMK1A,ADKB,DAPK3,CAMK2B1,GSK3BB,NRP1A,BRSK2A,PKMA,TNIKB,MAPK8B,CSNK1G2B,AKT3A,MAP3K3,EPHA3,AK2,CDKN1A,NEK4,CLK4B,DSTYK,POLR1A,CAMK2G2,SIK2B,NADK2,POLR1C,DGKH,TRIB1…
male	MEred	GO:MF	phospholipid binding	GO:0005543	0.0348714	1.45753	308	697	22	24485	SI:CH211-195B13.1,ARFIP2B,GSNA,PCYT1BA,HGS,SYT1A,PACSIN1A,SYTL2B,STAM2,SNX7,SNX9A,TOM1L2,CLVS2,SYT11B,SNX22,DYSF,ARHGAP33,TOM1,HIP1RB,SNX2,ZFYVE16,SYT19
male	MEred	GO:MF	anion binding	GO:0043168	0.0409724	1.38751	3147	697	124	24485	SI:CH211-195B13.1,MYO1HA,DDX3XA,DHX29,ATAD1A,RAB39BA,ADSS2,RAB30,VPS4B,ARL8A,SEPT15,PDK4,GSNA,CDK5,CDK14,CSNK1E,CASKA,OPA1,OXSR1A,STK25A,PRKAR1B,PYGMB,KIF5BB,RAB11A,KIF21A,PDK3A,CHD1,MFN2,MBD3B,RAB3AB,RAB10,EPHB4B,MYO10,SI:DKEY-172J4.3,CAMK2D2,SYK,SIRT1,UBE2B,MAPK9,ATP1A1B,GNAL2,HK1,RAB41,UBE2D4,MARK3B,TNIKA,MYH9B,MAPK8A,MAPK1,GAD1B,RAB14,MLH1,KIF13BB,CLVS2,CNTN1B,MYO16,ATP2B3B,ACVR1BB,ACVR1BA,MC…
male	MEred	GO:MF	kinase activity	GO:0016301	0.0480552	1.31826	1364	697	63	24485	SI:CH211-195B13.1,CHKA,PDK4,CDK5,CDK14,CSNK1E,CASKA,OXSR1A,STK25A,FGFRL1B,PDK3A,EPHB4B,SI:DKEY-172J4.3,CAMK2D2,SYK,IP6K2B,MAPK9,CERK,HK1,MARK3B,TNIKA,MAPK8A,MAPK1,ACVR1BB,ACVR1BA,PIP5K1CA,MAK,NUAK1A,LIMK1A,CAMK1A,ADKB,DAPK3,CAMK2B1,GSK3BB,NRP1A,BRSK2A,PKMA,TNIKB,MAPK8B,CSNK1G2B,AKT3A,MAP3K3,EPHA3,AK2,CDKN1A,NEK4,CLK4B,DSTYK,CAMK2G2,SIK2B,NADK2,DGKH,TRIB1,EPHA4B,OXSR1B,MAPK14B,PRKX,PANK1A,DCLK1A,P…
male	MEred	GO:BP	localization	GO:0051179	1.78537e-10	9.74827	4250	641	202	21828	GABRG2,ATP6V0A1B,MYO1HA,COPZ1,DDX3XA,NAPAA,ARL8A,VAMP2,GRIN1A,SEPT15,ARFIP2B,FGF6A,SLC7A3A,SLC2A1B,SLC38A3A,GABRA1,GABRR2A,TMED1B,OCRL,CDK5,CSNK1E,ATP1B2A,CASKA,OXSR1A,SLC16A5A,GPC1B,KCNAB2A,PYGMB,HOMER1B,CACNB4B,PREB,RAB11A,VAPB,SLC25A42,NUP98,SFXN3,ZGC:101540,SYT1A,TMEM63BA,SLC19A2,PRELID3B,MFN2,PCDH18A,TOMM40L,SLC37A4B,SLC25A14,SLC16A8,NAPGB,RAB3AB,PACSIN1A,ELMO1,RAB10,NDFIP1L,LZTS2A,EXOC8,SEM…
male	MEred	GO:BP	establishment of localization	GO:0051234	9.07938e-09	8.04194	3430	641	167	21828	GABRG2,ATP6V0A1B,MYO1HA,COPZ1,NAPAA,ARL8A,VAMP2,GRIN1A,ARFIP2B,SLC7A3A,SLC2A1B,SLC38A3A,GABRA1,GABRR2A,TMED1B,OCRL,CDK5,CSNK1E,ATP1B2A,SLC16A5A,KCNAB2A,HOMER1B,CACNB4B,PREB,RAB11A,SLC25A42,NUP98,SFXN3,ZGC:101540,SYT1A,TMEM63BA,SLC19A2,PRELID3B,MFN2,TOMM40L,SLC37A4B,SLC25A14,SLC16A8,NAPGB,RAB3AB,PACSIN1A,ELMO1,RAB10,NDFIP1L,LZTS2A,EXOC8,SLC22A21,STX6,SLC39A7,LGALS3A,SCAMP5A,SYTL2B,GRPEL2,SYK,SI:DK…
male	MEred	GO:BP	cellular localization	GO:0051641	1.55884e-08	7.8072	1427	641	89	21828	MYO1HA,COPZ1,NAPAA,SEPT15,ARFIP2B,TMED1B,OCRL,CDK5,GPC1B,PREB,RAB11A,VAPB,NUP98,SYT1A,MFN2,TOMM40L,SLC25A14,NAPGB,RAB3AB,RAB10,NDFIP1L,LZTS2A,STX6,SYTL2B,GRPEL2,SYK,SI:DKEY-17O15.2,TBC1D14,SCN4BA,RAB41,TM9SF2,RAB14,NUP35,ZDHHC7,MLH1,SNX9A,TOM1L2,AP3M2,MCTP1A,PMPCA,GRIPAP1,MYO16,VTI1B,SI:CH211-161H7.4,TM9SF4,ANK2B,ZDHHC18A,MAK,KIF1AA,TOMM34,TM9SF3,RAB5AA,NACAD,CAMLG,EPS15L1B,STXBP1A,VTI1A,VIPAS39,…
male	MEred	GO:BP	transport	GO:0006810	4.71145e-08	7.32685	3388	641	163	21828	GABRG2,ATP6V0A1B,MYO1HA,COPZ1,NAPAA,ARL8A,VAMP2,GRIN1A,ARFIP2B,SLC7A3A,SLC2A1B,SLC38A3A,GABRA1,GABRR2A,TMED1B,OCRL,CDK5,CSNK1E,ATP1B2A,SLC16A5A,KCNAB2A,HOMER1B,CACNB4B,PREB,RAB11A,SLC25A42,NUP98,SFXN3,ZGC:101540,SYT1A,TMEM63BA,SLC19A2,PRELID3B,MFN2,TOMM40L,SLC37A4B,SLC25A14,SLC16A8,NAPGB,RAB3AB,PACSIN1A,ELMO1,RAB10,NDFIP1L,LZTS2A,EXOC8,SLC22A21,STX6,SLC39A7,LGALS3A,SCAMP5A,SYTL2B,GRPEL2,SYK,SI:DK…
male	MEred	GO:BP	establishment of localization in cell	GO:0051649	1.17363e-06	5.93047	1166	641	73	21828	MYO1HA,COPZ1,NAPAA,ARFIP2B,TMED1B,OCRL,CDK5,PREB,RAB11A,NUP98,SYT1A,MFN2,TOMM40L,SLC25A14,NAPGB,RAB3AB,NDFIP1L,LZTS2A,STX6,SYTL2B,GRPEL2,SYK,SI:DKEY-17O15.2,TBC1D14,SCN4BA,RAB41,RAB14,NUP35,ZDHHC7,MLH1,SNX9A,TOM1L2,AP3M2,MCTP1A,PMPCA,GRIPAP1,MYO16,VTI1B,SI:CH211-161H7.4,ZDHHC18A,MAK,KIF1AA,TOMM34,RAB5AA,NACAD,EPS15L1B,STXBP1A,VTI1A,VIPAS39,VPS26C,DNM1A,AP2A1,PRICKLE2B,RAMP1,DNM2A,CHMP2A,DIAPH2,CA…
male	MEred	GO:BP	protein localization	GO:0008104	2.6699e-06	5.57351	1048	641	67	21828	COPZ1,NAPAA,ARL8A,SEPT15,ARFIP2B,TMED1B,GPC1B,PREB,RAB11A,TOMM40L,NAPGB,RAB3AB,RAB10,STX6,SCAMP5A,SYTL2B,GRPEL2,TBC1D14,RAB41,TM9SF2,SI:DKEY-181M9.8,RAB14,SNX7,NUP35,ZDHHC7,SNX9A,TOM1L2,AP3M2,PMPCA,RRBP1A,GRIPAP1,VTI1B,TM9SF4,ANK2B,ZDHHC18A,TOMM34,TM9SF3,RAB5AA,NACAD,CAMLG,NBEAA,STXBP1A,VTI1A,VIPAS39,NAGPA,ANKRD39,PIGU,VPS26C,NBEAB,CDH23,AP2A1,TANGO6,RAMP1,CADPSA,ZDHHC9,ARHGAP33,XPO1A,TOM1,STX1B,…
male	MEred	GO:BP	establishment of protein localization	GO:0045184	5.28555e-05	4.27691	826	641	54	21828	COPZ1,NAPAA,ARL8A,ARFIP2B,TMED1B,PREB,RAB11A,TOMM40L,NAPGB,RAB3AB,RAB10,STX6,SCAMP5A,SYTL2B,GRPEL2,TBC1D14,RAB41,SI:DKEY-181M9.8,RAB14,SNX7,NUP35,ZDHHC7,SNX9A,TOM1L2,AP3M2,PMPCA,RRBP1A,GRIPAP1,VTI1B,ZDHHC18A,TOMM34,RAB5AA,NACAD,CAMLG,STXBP1A,VTI1A,VIPAS39,NAGPA,VPS26C,AP2A1,TANGO6,RAMP1,CADPSA,ZDHHC9,ARHGAP33,XPO1A,TOM1,STX1B,RAB6BA,STX18,KIF13A,SNX2,RAB43,SGSM2
male	MEred	GO:BP	nitrogen compound transport	GO:0071705	6.34605e-05	4.1975	1064	641	64	21828	COPZ1,NAPAA,ARL8A,ARFIP2B,SLC7A3A,SLC38A3A,TMED1B,PREB,RAB11A,SFXN3,SYT1A,TOMM40L,NAPGB,RAB3AB,RAB10,STX6,SCAMP5A,SYTL2B,GRPEL2,SI:DKEY-17O15.2,TBC1D14,RAB41,SI:DKEY-181M9.8,RAB14,SNX7,SLC6A1A,NUP35,ZDHHC7,SNX9A,TOM1L2,AP3M2,PMPCA,RRBP1A,GRIPAP1,VTI1B,SYT11B,ZDHHC18A,TOMM34,RAB5AA,NACAD,STXBP1A,VTI1A,VIPAS39,NAGPA,VPS26C,AP2A1,SLC7A1B,TANGO6,RAMP1,CADPSA,ZDHHC9,SFXN5B,ARHGAP33,XPO1A,TOM1,STX1B,RA…
male	MEred	GO:BP	protein transport	GO:0015031	9.13884e-05	4.03911	817	641	53	21828	COPZ1,NAPAA,ARL8A,ARFIP2B,TMED1B,PREB,RAB11A,TOMM40L,NAPGB,RAB3AB,RAB10,STX6,SCAMP5A,SYTL2B,GRPEL2,TBC1D14,RAB41,SI:DKEY-181M9.8,RAB14,SNX7,NUP35,ZDHHC7,SNX9A,TOM1L2,AP3M2,PMPCA,RRBP1A,GRIPAP1,VTI1B,ZDHHC18A,TOMM34,RAB5AA,NACAD,STXBP1A,VTI1A,VIPAS39,NAGPA,VPS26C,AP2A1,TANGO6,RAMP1,CADPSA,ZDHHC9,ARHGAP33,XPO1A,TOM1,STX1B,RAB6BA,STX18,KIF13A,SNX2,RAB43,SGSM2
male	MEred	GO:BP	macromolecule localization	GO:0033036	9.9716e-05	4.00124	1322	641	74	21828	COPZ1,NAPAA,ARL8A,SEPT15,ARFIP2B,TMED1B,GPC1B,PYGMB,PREB,RAB11A,ZGC:101540,PRELID3B,TOMM40L,NAPGB,RAB3AB,RAB10,STX6,SCAMP5A,SYTL2B,GRPEL2,SI:DKEY-17O15.2,TBC1D14,RAB41,TM9SF2,SI:DKEY-181M9.8,RAB14,SNX7,NUP35,RFT1,ZDHHC7,SNX9A,TOM1L2,AP3M2,PMPCA,RRBP1A,GRIPAP1,VTI1B,TM9SF4,ANK2B,VLDLR,ZDHHC18A,TOMM34,TM9SF3,RAB5AA,NACAD,CAMLG,NBEAA,STXBP1A,VTI1A,VIPAS39,NAGPA,ANKRD39,PIGU,VPS26C,NBEAB,CDH23,AP2A1,…
male	MEred	GO:BP	vesicle-mediated transport	GO:0016192	0.000117762	3.92899	916	641	57	21828	COPZ1,VAMP2,TMED1B,OCRL,CSNK1E,PREB,RAB11A,SYT1A,RAB3AB,PACSIN1A,ELMO1,RAB10,EXOC8,STX6,LGALS3A,SYTL2B,SYK,RAB41,RAB14,SNX9A,AP3M2,GRIPAP1,VTI1B,SYT11B,DBNLB,VLDLR,SI:CH211-51A6.2,KIF1AA,SGIP1A,RAB11FIP1A,RAB5AA,EPS15L1B,STXBP1A,VTI1A,SYT3,STXBP5L,CACNA1G,DNM1A,SH3GL3A,CSNK1G2B,ZGC:92912,CDH23,AP2A1,RAMP1,DNM2A,DYSF,CADPSA,LRP8,STX1B,RAB6BA,HIP1RB,PRSS12,SNX2,ZFYVE16,NRBP1,SYT19,ZGC:63587
male	MEred	GO:BP	cellular protein localization	GO:0034613	0.000151711	3.81898	830	641	53	21828	COPZ1,NAPAA,SEPT15,ARFIP2B,TMED1B,GPC1B,RAB11A,TOMM40L,NAPGB,RAB3AB,RAB10,STX6,SYTL2B,GRPEL2,TBC1D14,RAB41,TM9SF2,RAB14,ZDHHC7,SNX9A,TOM1L2,AP3M2,PMPCA,GRIPAP1,VTI1B,TM9SF4,ANK2B,ZDHHC18A,TOMM34,TM9SF3,RAB5AA,NACAD,CAMLG,STXBP1A,VTI1A,VIPAS39,ANKRD39,PIGU,VPS26C,CDH23,AP2A1,RAMP1,ZDHHC9,XPO1A,STX1B,WRAP73,RAB6BA,STX18,KIF13A,SNX2,RAB43,ZGC:63587,SGSM2
male	MEred	GO:BP	cellular macromolecule localization	GO:0070727	0.00016381	3.78566	832	641	53	21828	COPZ1,NAPAA,SEPT15,ARFIP2B,TMED1B,GPC1B,RAB11A,TOMM40L,NAPGB,RAB3AB,RAB10,STX6,SYTL2B,GRPEL2,TBC1D14,RAB41,TM9SF2,RAB14,ZDHHC7,SNX9A,TOM1L2,AP3M2,PMPCA,GRIPAP1,VTI1B,TM9SF4,ANK2B,ZDHHC18A,TOMM34,TM9SF3,RAB5AA,NACAD,CAMLG,STXBP1A,VTI1A,VIPAS39,ANKRD39,PIGU,VPS26C,CDH23,AP2A1,RAMP1,ZDHHC9,XPO1A,STX1B,WRAP73,RAB6BA,STX18,KIF13A,SNX2,RAB43,ZGC:63587,SGSM2
male	MEred	GO:BP	regulation of vesicle-mediated transport	GO:0060627	0.00030921	3.50975	128	641	17	21828	PREB,SYT1A,RAB3AB,PACSIN1A,RAB10,LGALS3A,SYK,GRIPAP1,SYT11B,RAB5AA,CACNA1G,DYSF,CADPSA,STX1B,HIP1RB,SYT19,ZGC:63587
male	MEred	GO:BP	intracellular transport	GO:0046907	0.000394219	3.40426	950	641	57	21828	MYO1HA,COPZ1,NAPAA,ARFIP2B,TMED1B,PREB,RAB11A,NUP98,MFN2,TOMM40L,SLC25A14,NAPGB,RAB3AB,NDFIP1L,LZTS2A,STX6,SYTL2B,GRPEL2,SI:DKEY-17O15.2,TBC1D14,RAB41,RAB14,NUP35,ZDHHC7,SNX9A,TOM1L2,AP3M2,PMPCA,GRIPAP1,MYO16,VTI1B,ZDHHC18A,MAK,KIF1AA,TOMM34,RAB5AA,NACAD,EPS15L1B,STXBP1A,VTI1A,VIPAS39,VPS26C,AP2A1,RAMP1,CHMP2A,HTATIP2,ZDHHC9,XPO1A,STX1B,RAB6BA,STX18,KIF13A,SNX2,RAB43,ZFYVE16,NRBP1,SGSM2
male	MEred	GO:BP	organic substance transport	GO:0071702	0.000453179	3.34373	1374	641	74	21828	COPZ1,NAPAA,ARL8A,ARFIP2B,SLC7A3A,SLC2A1B,SLC38A3A,TMED1B,SLC16A5A,PREB,RAB11A,SFXN3,ZGC:101540,SYT1A,PRELID3B,TOMM40L,SLC25A14,SLC16A8,NAPGB,RAB3AB,RAB10,STX6,SCAMP5A,SYTL2B,GRPEL2,SI:DKEY-17O15.2,TBC1D14,RAB41,SI:DKEY-181M9.8,RAB14,SNX7,SLC6A1A,NUP35,RFT1,ZDHHC7,SNX9A,TOM1L2,AP3M2,PMPCA,RRBP1A,GRIPAP1,VTI1B,SYT11B,VLDLR,ZDHHC18A,TOMM34,RAB5AA,NACAD,STXBP1A,VTI1A,VIPAS39,NAGPA,VPS26C,AP2A1,SLC7A…
male	MEred	GO:BP	cell projection organization	GO:0030030	0.0018025	2.74413	804	641	49	21828	MAPTB,SEPT15,TMEM59L,FXR1,GSNA,OCRL,CDK5,OGG1,CEP290,SI:CH73-100L22.3,MFN2,CEP162,RAB3AB,PACSIN1A,ELMO1,RAB10,KCTD17,SEMA3E,NCAM1A,TNR,TNC,MAP4L,EXTL3,PPP1R9BB,LAMC3,DBNLB,MCM7,KCNC3A,MAK,ZNF365,RAB5AA,STIM1A,NBEAA,GSK3BB,NRP1A,BRSK2A,RAB33A,CDH23,PPP1R9ALB,ABLIM1B,CAPZB,PRICKLE2B,ROBO4,CNTROB,AMIGO1,PPP1R9A,TMEM67,BTBD3B,LMTK2
male	MEred	GO:BP	intracellular protein transport	GO:0006886	0.00237523	2.62429	604	641	40	21828	COPZ1,NAPAA,ARFIP2B,TMED1B,RAB11A,TOMM40L,NAPGB,RAB3AB,STX6,SYTL2B,GRPEL2,TBC1D14,RAB41,RAB14,ZDHHC7,SNX9A,TOM1L2,AP3M2,PMPCA,GRIPAP1,VTI1B,ZDHHC18A,TOMM34,RAB5AA,NACAD,STXBP1A,VTI1A,VIPAS39,VPS26C,AP2A1,RAMP1,ZDHHC9,XPO1A,STX1B,RAB6BA,STX18,KIF13A,SNX2,RAB43,SGSM2
male	MEred	GO:BP	plasma membrane bounded cell projection organization	GO:0120036	0.00307417	2.51227	772	641	47	21828	MAPTB,SEPT15,TMEM59L,FXR1,OCRL,CDK5,OGG1,SI:CH73-100L22.3,MFN2,CEP162,RAB3AB,PACSIN1A,ELMO1,RAB10,KCTD17,SEMA3E,NCAM1A,TNR,TNC,MAP4L,EXTL3,PPP1R9BB,LAMC3,DBNLB,MCM7,KCNC3A,MAK,ZNF365,RAB5AA,STIM1A,NBEAA,GSK3BB,NRP1A,BRSK2A,RAB33A,CDH23,PPP1R9ALB,ABLIM1B,CAPZB,PRICKLE2B,ROBO4,CNTROB,AMIGO1,PPP1R9A,TMEM67,BTBD3B,LMTK2
male	MEred	GO:BP	organelle localization	GO:0051640	0.0058716	2.23124	228	641	21	21828	MYO1HA,OCRL,CDK5,PREB,RAB11A,VAPB,MFN2,RAB3AB,RAB10,STX6,SYK,MLH1,MYO16,SI:CH211-161H7.4,STXBP1A,PRICKLE2B,DIAPH2,STX1B,TMEM230B,SI:CH211-166A6.5,ESYT2B
male	MEred	GO:BP	export from cell	GO:0140352	0.014919	1.82626	281	641	23	21828	ATP1B2A,PREB,RAB11A,SYT1A,RAB3AB,RAB10,EXOC8,SYTL2B,SYK,ATP1A1B,MCTP1A,SYT11B,RAB11FIP1A,STXBP1A,NAGPA,SYT3,STXBP5L,CACNA1G,TANGO6,CADPSA,STX1B,SYT19,ZGC:63587
male	MEred	GO:BP	exocytosis	GO:0006887	0.0257793	1.58873	176	641	17	21828	RAB11A,SYT1A,RAB3AB,RAB10,EXOC8,SYTL2B,SYK,SYT11B,RAB11FIP1A,STXBP1A,SYT3,STXBP5L,CACNA1G,CADPSA,STX1B,SYT19,ZGC:63587
male	MEred	GO:BP	secretion by cell	GO:0032940	0.0273717	1.5627	252	641	21	21828	PREB,RAB11A,SYT1A,RAB3AB,RAB10,EXOC8,SYTL2B,SYK,MCTP1A,SYT11B,RAB11FIP1A,STXBP1A,NAGPA,SYT3,STXBP5L,CACNA1G,TANGO6,CADPSA,STX1B,SYT19,ZGC:63587
male	MEred	GO:BP	endocytosis	GO:0006897	0.0370103	1.43168	318	641	24	21828	OCRL,CSNK1E,SYT1A,PACSIN1A,LGALS3A,SNX9A,DBNLB,VLDLR,SI:CH211-51A6.2,SGIP1A,RAB5AA,EPS15L1B,DNM1A,SH3GL3A,CSNK1G2B,CDH23,AP2A1,RAMP1,DNM2A,LRP8,HIP1RB,PRSS12,SNX2,SYT19
male	MEred	GO:BP	multicellular organism development	GO:0007275	0.0370635	1.43105	3296	641	135	21828	MYO1HA,COPZ1,MAPTB,VPS4B,EDIL3B,TOMM70A,NOLC1,SEPT15,SAT1B,FGF6A,TMEM59L,FXR1,SLC2A1B,GSNA,OCRL,CDK5,OGG1,STK25A,PYGMB,CACNB4B,RAB11A,ACSL4A,KIF21A,NUP98,FGFRL1B,NOMO,MFN2,PCDH18A,MBD3B,RAB3AB,PACSIN1A,ST8SIA3,ELMO1,RAB10,LZTS2A,ZFYVE9B,SEMA3E,RPL28,MYO10,ETV1,SI:DKEY-172J4.3,SYK,SIRT1,MAPK9,AHCYL1,NCAM1A,TNR,TNC,BCL2L1,CBX8B,MAPK1,NRSN1L,SNX7,IRX1B,MAP4L,KIF13BB,EXTL3,MYO16,PPP1R9BB,LAMC3,ACVR1B…
male	MEred	GO:CC	cytoplasm	GO:0005737	4.3885e-19	18.3577	6733	580	299	20566	MACO1A,SI:DKEY-19E4.5,MFAP3L,PDP1,TBCCD1,ATP6V0A1B,MYO1HA,COPZ1,DDX3XA,CS,RAB39BA,MAPTB,ADSS2,RAB30,VPS4B,PDHA1A,HNRNPM,TMTC3,IDH3G,SYVN1,VAMP2,CHKA,PPP3CCB,SEPT15,PDK4,ARFIP2B,FGF6A,TMEM59L,CALR3A,FXR1,CEPT1B,GSNA,TMED1B,OCRL,CDK5,CDK14,ELOVL4A,CSNK1E,CERS1,ZMP:0000000662,OPA1,EIF4EBP2,ARNTL2,PRKAR1B,KCNAB2A,PYGMB,HOMER1B,TMEM9,PREB,CEP290,FRMD4BB,RAB11A,VAPB,SLC25A42,ACSL4A,KIF21A,PREPL,SFXN3,P…
male	MEred	GO:CC	endomembrane system	GO:0012505	3.95639e-13	12.4027	1799	580	111	20566	MACO1A,COPZ1,RAB39BA,RAB30,VPS4B,TMTC3,SYVN1,VAMP2,ARFIP2B,TMEM59L,CALR3A,CEPT1B,TMED1B,OCRL,ELOVL4A,CERS1,ZMP:0000000662,PREB,RAB11A,VAPB,ACSL4A,PREPL,NUP98,NOMO,SYT1A,DIPK1B,POMGNT1,TMEM214,RAB3AB,PACSIN1A,ST8SIA3,ST6GALNAC4,RAB10,BCL2B,ZFYVE9B,SI:DKEY-253I9.4,STX6,CPE,CERS5,MAN2A2,RAP1GDS1,SYTL2B,SIRT1,TBC1D14,SYPA,RAB41,RAB14,NRSN1L,NUP35,RFT1,ZDHHC7,MGAT4A,TLCD3BB,TOM1L2,CLVS2,SSR1,EXTL3,MCT…
male	MEred	GO:CC	vesicle	GO:0031982	8.77888e-12	11.0566	733	580	61	20566	MYO1HA,COPZ1,VPS4B,VAMP2,TMED1B,OCRL,RAB11A,SYT1A,RAB3AB,PACSIN1A,RAB10,ZFYVE9B,SI:DKEY-253I9.4,STX6,CPE,SYTL2B,TBC1D14,SYPA,RAB14,NRSN1L,SNX9A,TOM1L2,CLVS2,MCTP1A,GRIPAP1,MYO16,VTI1B,SYT11B,SLC9A7,DBNLB,SGIP1A,SV2A,RAB5AA,HAX1,STXBP1A,VTI1A,VIPAS39,SYNGR1A,RAB33A,LDLRAD4A,VPS26C,SH3GL3A,ADA,AP2A1,ENKUR,CAV1,DDHD2,DYSF,SH3GL1B,CADPSA,TOM1,STX1B,PROM1B,SYPL2B,APBA2A,HIP1RB,TMEM230B,RND3A,ZFYVE16,S…
male	MEred	GO:CC	cytoplasmic vesicle	GO:0031410	2.40286e-11	10.6193	689	580	58	20566	COPZ1,VPS4B,VAMP2,TMED1B,OCRL,RAB11A,SYT1A,RAB3AB,PACSIN1A,RAB10,ZFYVE9B,SI:DKEY-253I9.4,STX6,CPE,SYTL2B,TBC1D14,SYPA,RAB14,NRSN1L,SNX9A,TOM1L2,CLVS2,MCTP1A,GRIPAP1,VTI1B,SYT11B,SLC9A7,DBNLB,SGIP1A,SV2A,RAB5AA,HAX1,STXBP1A,VTI1A,VIPAS39,SYNGR1A,RAB33A,LDLRAD4A,VPS26C,SH3GL3A,ADA,AP2A1,ENKUR,CAV1,DDHD2,DYSF,SH3GL1B,CADPSA,TOM1,STX1B,SYPL2B,APBA2A,HIP1RB,TMEM230B,RND3A,ZFYVE16,SYT19,ZGC:63587
male	MEred	GO:CC	intracellular vesicle	GO:0097708	2.40286e-11	10.6193	689	580	58	20566	COPZ1,VPS4B,VAMP2,TMED1B,OCRL,RAB11A,SYT1A,RAB3AB,PACSIN1A,RAB10,ZFYVE9B,SI:DKEY-253I9.4,STX6,CPE,SYTL2B,TBC1D14,SYPA,RAB14,NRSN1L,SNX9A,TOM1L2,CLVS2,MCTP1A,GRIPAP1,VTI1B,SYT11B,SLC9A7,DBNLB,SGIP1A,SV2A,RAB5AA,HAX1,STXBP1A,VTI1A,VIPAS39,SYNGR1A,RAB33A,LDLRAD4A,VPS26C,SH3GL3A,ADA,AP2A1,ENKUR,CAV1,DDHD2,DYSF,SH3GL1B,CADPSA,TOM1,STX1B,SYPL2B,APBA2A,HIP1RB,TMEM230B,RND3A,ZFYVE16,SYT19,ZGC:63587
male	MEred	GO:CC	organelle membrane	GO:0031090	1.29811e-09	8.88669	1375	580	85	20566	MACO1A,ATP6V0A1B,COPZ1,RAB39BA,VPS4B,SYVN1,VAMP2,ARFIP2B,TMEM59L,CALR3A,CEPT1B,TMED1B,OCRL,ELOVL4A,OPA1,TMEM9,PREB,VAPB,SLC25A42,SFXN3,NOMO,SYT1A,MFN2,DIPK1B,POMGNT1,TOMM40L,SLC25A14,TMEM214,NAPGB,RAB3AB,PACSIN1A,BCL2B,STX6,CPE,CERS5,MAN2A2,GRPEL2,SIRT1,SYPA,BCL2L1,RAB14,NUP35,RFT1,ZDHHC7,SNX9A,SSR1,EXTL3,MCTP1A,RRBP1A,GRIPAP1,TMED8,VTI1B,SLC9A7,DBNLB,LETM1,ZDHHC18A,SV2A,ALG8,STIM1A,LNPK,VTI1A,SY…
male	MEred	GO:CC	bounding membrane of organelle	GO:0098588	1.32937e-06	5.87635	702	580	49	20566	MACO1A,ATP6V0A1B,COPZ1,RAB39BA,VPS4B,VAMP2,TMEM59L,TMED1B,OCRL,TMEM9,SYT1A,MFN2,POMGNT1,TOMM40L,NAPGB,RAB3AB,BCL2B,STX6,CPE,MAN2A2,SYPA,BCL2L1,RAB14,ZDHHC7,MCTP1A,GRIPAP1,TMED8,VTI1B,SLC9A7,DBNLB,ZDHHC18A,SV2A,VTI1A,SYNGR1A,SI:DKEY-28B4.8,LDLRAD4A,SH3GL3A,AP2A1,CAV1,BAXB,SH3GL1B,ZDHHC9,TPCN2,QTRT1,SYPL2B,FUT10,ZFYVE16,SYT19,ZGC:63587
male	MEred	GO:CC	cell junction	GO:0030054	3.09995e-06	5.50865	1002	580	61	20566	GABRG2,VAMP2,GRIN1A,FXR1,GABRA1,GABRR2A,CASKA,GPC1B,CDH10A,KCNAB2A,HOMER1B,CACNB4B,FRMD4BB,RAB11A,SYT1A,RAB3AB,PACSIN1A,RAB10,SI:DKEY-253I9.4,STX6,PCLOA,SYPA,TJP1B,MCTP1A,GRIPAP1,PPP1R9BB,SYT11B,DBNLB,SV2A,RAB5AA,MAGI3A,JUPA,CTNND1,STXBP1A,GSK3BB,SYNGR1A,TLN2B,SLC12A5B,DNM1A,ADA,NLGN2A,PPP1R9ALB,CAV1,DNM2A,KCNA1A,CHRM4A,CADPSA,GRIA4A,PPP1R9A,STX1B,KCNMA1A,TNS1A,SYPL2B,ZGC:153615,APBA2A,PRSS12,TME…
male	MEred	GO:CC	cytoplasmic vesicle membrane	GO:0030659	3.26522e-06	5.48609	288	580	28	20566	COPZ1,VPS4B,VAMP2,OCRL,SYT1A,RAB3AB,PACSIN1A,STX6,CPE,SYPA,RAB14,SNX9A,MCTP1A,GRIPAP1,VTI1B,SLC9A7,DBNLB,SV2A,VTI1A,SYNGR1A,LDLRAD4A,SH3GL3A,AP2A1,DYSF,SH3GL1B,SYPL2B,ZFYVE16,SYT19
male	MEred	GO:CC	transport vesicle	GO:0030133	3.53406e-06	5.45173	186	580	22	20566	VAMP2,RAB11A,SYT1A,RAB3AB,RAB10,STX6,CPE,SYTL2B,SYPA,NRSN1L,MCTP1A,VTI1B,SYT11B,SV2A,VTI1A,SYNGR1A,STX1B,SYPL2B,APBA2A,TMEM230B,SYT19,ZGC:63587
male	MEred	GO:CC	vesicle membrane	GO:0012506	3.79659e-06	5.42061	290	580	28	20566	COPZ1,VPS4B,VAMP2,OCRL,SYT1A,RAB3AB,PACSIN1A,STX6,CPE,SYPA,RAB14,SNX9A,MCTP1A,GRIPAP1,VTI1B,SLC9A7,DBNLB,SV2A,VTI1A,SYNGR1A,LDLRAD4A,SH3GL3A,AP2A1,DYSF,SH3GL1B,SYPL2B,ZFYVE16,SYT19
male	MEred	GO:CC	synapse	GO:0045202	5.72263e-06	5.2424	667	580	46	20566	GABRG2,VAMP2,GRIN1A,FXR1,GABRA1,GABRR2A,GPC1B,KCNAB2A,HOMER1B,CACNB4B,RAB11A,SYT1A,RAB3AB,PACSIN1A,RAB10,STX6,PCLOA,SYPA,MCTP1A,GRIPAP1,PPP1R9BB,SYT11B,DBNLB,SV2A,RAB5AA,STXBP1A,GSK3BB,SYNGR1A,SLC12A5B,DNM1A,NLGN2A,PPP1R9ALB,DNM2A,KCNA1A,CHRM4A,CADPSA,GRIA4A,PPP1R9A,STX1B,KCNMA1A,SYPL2B,APBA2A,PRSS12,TMEM230B,SYT19,ZGC:63587
male	MEred	GO:CC	plasma membrane bounded cell projection	GO:0120025	1.332e-05	4.8755	873	580	54	20566	GABRG2,MYO1HA,MAPTB,GRIN1A,SEPT15,FXR1,GABRA1,GABRR2A,KCNAB2A,HOMER1B,RAB11A,SYT1A,MFN2,CEP162,RAB3AB,PACSIN1A,MARK3B,NRSN1L,SLC6A1A,MAP4L,CFAP36,MYO16,SPATA6L,PPP1R9BB,SYT11B,DBNLB,KCNC3A,MAK,TMEM218,LIMK1A,KIF1AA,SV2A,RAB5AA,CAMK2B1,GSK3BB,TLN2B,CACNA1G,ZGC:109889,CDH23,PPP1R9ALB,KCNA1A,CHRM4A,ROBO4,CAMK2G2,GRIA4A,ADCYAP1R1B,PPP1R9A,TMEM67,PROM1B,PRSS12,SLC6A22.2,SYT19,ABI2A,ZGC:63587
male	MEred	GO:CC	cell projection	GO:0042995	2.62586e-05	4.58073	940	580	56	20566	GABRG2,MYO1HA,MAPTB,GRIN1A,SEPT15,FXR1,GABRA1,GABRR2A,KCNAB2A,HOMER1B,CEP290,RAB11A,SYT1A,MFN2,CEP162,RAB3AB,PACSIN1A,MARK3B,NRSN1L,SLC6A1A,MAP4L,CFAP36,MYO16,SPATA6L,PPP1R9BB,SYT11B,DBNLB,KCNC3A,MAK,TMEM218,LIMK1A,KIF1AA,SV2A,RAB5AA,CAMK2B1,GSK3BB,TLN2B,CACNA1G,ZGC:109889,CDH23,PPP1R9ALB,KCNA1A,CHRM4A,ROBO4,CAMK2G2,GRIA4A,ADCYAP1R1B,PPP1R9A,TMEM67,PROM1B,PRSS12,RND3A,SLC6A22.2,SYT19,ABI2A,ZGC:63…
male	MEred	GO:CC	neuron projection	GO:0043005	4.82005e-05	4.31695	580	580	40	20566	GABRG2,MAPTB,GRIN1A,FXR1,GABRA1,GABRR2A,KCNAB2A,HOMER1B,RAB11A,SYT1A,MFN2,RAB3AB,PACSIN1A,MARK3B,NRSN1L,SLC6A1A,MAP4L,PPP1R9BB,SYT11B,DBNLB,KCNC3A,LIMK1A,KIF1AA,SV2A,RAB5AA,CAMK2B1,GSK3BB,CACNA1G,CDH23,PPP1R9ALB,KCNA1A,CHRM4A,ROBO4,CAMK2G2,GRIA4A,ADCYAP1R1B,PPP1R9A,PRSS12,SLC6A22.2,SYT19
male	MEred	GO:CC	exocytic vesicle	GO:0070382	5.55187e-05	4.25556	134	580	17	20566	VAMP2,SYT1A,RAB3AB,RAB10,STX6,SYTL2B,SYPA,MCTP1A,SYT11B,SV2A,SYNGR1A,STX1B,SYPL2B,APBA2A,TMEM230B,SYT19,ZGC:63587
male	MEred	GO:CC	membrane	GO:0016020	9.69646e-05	4.01339	8421	580	296	20566	MACO1A,MFAP3L,ASPH,TLCD4A,GABRG2,ATP6V0A1B,MYO1HA,COPZ1,RAB39BA,BACE1,VPS4B,TMEM185,TMTC3,TOMM70A,SYVN1,TLCD4B,VAMP2,GRIN1A,SEPT15,ARFIP2B,TMEM59L,SLC7A3A,CALR3A,FXR1,SLC2A1B,SLC38A3A,CEPT1B,GABRA1,GABRR2A,TMED1B,OCRL,FAIM2A,ELOVL4A,ELMOD3,ATP1B2A,CERS1,ZMP:0000000662,OPA1,PIK3R2,SLC16A5A,GPC1B,SIDT2,CDH10A,PRKAR1B,KCNAB2A,ZDHHC20B,GPR107,HOMER1B,SPPL2,TMEM9,CACNB4B,CALN1,PREB,GPR158A,VAPB,SLC25A…
male	MEred	GO:CC	secretory vesicle	GO:0099503	0.000155043	3.80955	177	580	19	20566	VAMP2,SYT1A,RAB3AB,RAB10,STX6,SYTL2B,SYPA,MCTP1A,SYT11B,SV2A,STXBP1A,SYNGR1A,ENKUR,STX1B,SYPL2B,APBA2A,TMEM230B,SYT19,ZGC:63587
male	MEred	GO:CC	endosome	GO:0005768	0.000328122	3.48396	339	580	27	20566	VPS4B,OCRL,RAB11A,RAB3AB,PACSIN1A,RAB10,ZFYVE9B,SI:DKEY-253I9.4,TBC1D14,RAB14,TOM1L2,CLVS2,GRIPAP1,VTI1B,SLC9A7,DBNLB,RAB5AA,VTI1A,VIPAS39,RAB33A,LDLRAD4A,VPS26C,SH3GL3A,SH3GL1B,TOM1,TMEM230B,ZFYVE16
male	MEred	GO:CC	synaptic vesicle	GO:0008021	0.000342135	3.4658	120	580	15	20566	VAMP2,SYT1A,RAB3AB,RAB10,STX6,SYPA,MCTP1A,SV2A,SYNGR1A,STX1B,SYPL2B,APBA2A,TMEM230B,SYT19,ZGC:63587
male	MEred	GO:CC	presynapse	GO:0098793	0.000623842	3.20493	231	580	21	20566	VAMP2,FXR1,SYT1A,RAB3AB,RAB10,STX6,SYPA,MCTP1A,SV2A,STXBP1A,SYNGR1A,DNM1A,DNM2A,CADPSA,STX1B,SYPL2B,APBA2A,PRSS12,TMEM230B,SYT19,ZGC:63587
male	MEred	GO:CC	exocytic vesicle membrane	GO:0099501	0.000762117	3.11798	56	580	10	20566	VAMP2,SYT1A,RAB3AB,STX6,SYPA,MCTP1A,SV2A,SYNGR1A,SYPL2B,SYT19
male	MEred	GO:CC	synaptic vesicle membrane	GO:0030672	0.000762117	3.11798	56	580	10	20566	VAMP2,SYT1A,RAB3AB,STX6,SYPA,MCTP1A,SV2A,SYNGR1A,SYPL2B,SYT19
male	MEred	GO:CC	transport vesicle membrane	GO:0030658	0.000980555	3.00853	99	580	13	20566	VAMP2,SYT1A,RAB3AB,STX6,CPE,SYPA,MCTP1A,VTI1B,SV2A,VTI1A,SYNGR1A,SYPL2B,SYT19
male	MEred	GO:CC	organelle subcompartment	GO:0031984	0.000993622	3.00278	560	580	36	20566	MACO1A,RAB30,SYVN1,ARFIP2B,CALR3A,CEPT1B,TMED1B,ELOVL4A,PREB,VAPB,NOMO,DIPK1B,TMEM214,BCL2B,STX6,CERS5,RAB14,RFT1,MGAT4A,CLVS2,SSR1,EXTL3,RRBP1A,VTI1B,ALG8,STIM1A,LNPK,VTI1A,PIGU,SI:DKEY-28B4.8,SEL1L,ALG9,GBF1,CLGN,SULF2B,ZDHHC9
male	MEred	GO:CC	endoplasmic reticulum membrane	GO:0005789	0.00238415	2.62267	399	580	28	20566	MACO1A,SYVN1,CALR3A,CEPT1B,TMED1B,ELOVL4A,PREB,VAPB,NOMO,DIPK1B,TMEM214,BCL2B,CERS5,RFT1,SSR1,EXTL3,RRBP1A,VTI1B,ALG8,STIM1A,LNPK,VTI1A,PIGU,SI:DKEY-28B4.8,SEL1L,ALG9,CLGN,ZDHHC9
male	MEred	GO:CC	endoplasmic reticulum subcompartment	GO:0098827	0.00273769	2.56262	402	580	28	20566	MACO1A,SYVN1,CALR3A,CEPT1B,TMED1B,ELOVL4A,PREB,VAPB,NOMO,DIPK1B,TMEM214,BCL2B,CERS5,RFT1,SSR1,EXTL3,RRBP1A,VTI1B,ALG8,STIM1A,LNPK,VTI1A,PIGU,SI:DKEY-28B4.8,SEL1L,ALG9,CLGN,ZDHHC9
male	MEred	GO:CC	endoplasmic reticulum	GO:0005783	0.00276593	2.55816	708	580	41	20566	MACO1A,TMTC3,SYVN1,CALR3A,CEPT1B,TMED1B,ELOVL4A,CERS1,ZMP:0000000662,PREB,VAPB,ACSL4A,NOMO,DIPK1B,TMEM214,BCL2B,CERS5,RAP1GDS1,RFT1,ZDHHC7,MGAT4A,TLCD3BB,SSR1,EXTL3,RRBP1A,VTI1B,ZDHHC18A,HAX1,ALG8,CAMLG,STIM1A,LNPK,VTI1A,PIGU,SI:DKEY-28B4.8,SEL1L,ALG9,CLGN,SULF2B,ZDHHC9,PDIA3
male	MEred	GO:CC	membrane-bounded organelle	GO:0043227	0.00338118	2.47093	8346	580	285	20566	MACO1A,SI:DKEY-19E4.5,MFAP3L,PDP1,ATP6V0A1B,MYO1HA,COPZ1,DDX3XA,CS,RAB39BA,RAB30,VPS4B,PDHA1A,HNRNPM,TMTC3,SUPT3H,IDH3G,TCF7L1B,SYVN1,NOLC1,VAMP2,SEPT15,PDK4,ARFIP2B,DET1,TMEM59L,CALR3A,FXR1,CEPT1B,TMED1B,OCRL,CDK5,CDK14,ELOVL4A,CSNK1E,CERS1,PHF20L1,ZMP:0000000662,OPA1,OGG1,INO80B,ARNTL2,TMEM9,PREB,RAB11A,NUFIP1,VAPB,SLC25A42,ACSL4A,RFXANK,PREPL,NUP98,SFXN3,PDK3A,BCO2A,NOMO,SYT1A,SRSF6A,PRELID3B,…
male	MEred	GO:CC	nuclear outer membrane-endoplasmic reticulum membrane network	GO:0042175	0.00375584	2.42529	409	580	28	20566	MACO1A,SYVN1,CALR3A,CEPT1B,TMED1B,ELOVL4A,PREB,VAPB,NOMO,DIPK1B,TMEM214,BCL2B,CERS5,RFT1,SSR1,EXTL3,RRBP1A,VTI1B,ALG8,STIM1A,LNPK,VTI1A,PIGU,SI:DKEY-28B4.8,SEL1L,ALG9,CLGN,ZDHHC9
male	MEred	GO:CC	intracellular membrane-bounded organelle	GO:0043231	0.0108796	1.96339	8112	580	275	20566	MACO1A,SI:DKEY-19E4.5,MFAP3L,PDP1,ATP6V0A1B,COPZ1,DDX3XA,CS,RAB39BA,RAB30,VPS4B,PDHA1A,HNRNPM,TMTC3,SUPT3H,IDH3G,TCF7L1B,SYVN1,NOLC1,VAMP2,PDK4,ARFIP2B,DET1,TMEM59L,CALR3A,FXR1,CEPT1B,TMED1B,OCRL,CDK5,CDK14,ELOVL4A,CSNK1E,CERS1,PHF20L1,ZMP:0000000662,OPA1,OGG1,INO80B,ARNTL2,TMEM9,PREB,RAB11A,NUFIP1,VAPB,SLC25A42,ACSL4A,RFXANK,PREPL,NUP98,SFXN3,PDK3A,BCO2A,NOMO,SYT1A,SRSF6A,PRELID3B,MFN2,CLOCKB,DI…
male	MEred	GO:CC	early endosome membrane	GO:0031901	0.0131042	1.88259	36	580	7	20566	OCRL,RAB14,GRIPAP1,LDLRAD4A,SH3GL3A,SH3GL1B,ZFYVE16
male	MEred	GO:CC	axon	GO:0030424	0.0173233	1.76137	185	580	16	20566	FXR1,KCNAB2A,RAB11A,SYT1A,MFN2,RAB3AB,SLC6A1A,SYT11B,KCNC3A,KIF1AA,RAB5AA,GSK3BB,KCNA1A,ROBO4,PRSS12,SYT19
male	MEred	GO:CC	early endosome	GO:0005769	0.0211623	1.67444	97	580	11	20566	OCRL,RAB14,GRIPAP1,DBNLB,RAB5AA,VIPAS39,LDLRAD4A,SH3GL3A,SH3GL1B,TMEM230B,ZFYVE16
male	MEred	GO:CC	Golgi apparatus	GO:0005794	0.0405396	1.39212	643	580	35	20566	COPZ1,RAB39BA,RAB30,ARFIP2B,TMEM59L,CEPT1B,TMED1B,PREPL,POMGNT1,TMEM214,ST8SIA3,ST6GALNAC4,RAB10,STX6,MAN2A2,RAB41,RAB14,ZDHHC7,MGAT4A,CLVS2,EXTL3,TMED8,VTI1B,DBNLB,ZDHHC18A,VTI1A,RAB33A,LDLRAD4A,GBF1,CAV1,SULF2B,ZDHHC9,RAB6BA,FUT10,TMEM230B
male	MEred	REAC	RAB geranylgeranylation	REAC:R-DRE-8873719	0.00211039	2.67564	60	260	11	7340	RAB39BA,RAB30,RAB11A,RAB3AB,RAB10,RAB41,RAB14,RAB5AA,RAB33A,RAB6BA,RAB43
male	MEred	REAC	GABA synthesis, release, reuptake and degradation	REAC:R-DRE-888590	0.00779908	2.10796	18	260	6	7340	VAMP2,SYT1A,RAB3AB,DNAJC5AA,GAD1B,STXBP1A
male	MEred	REAC	Membrane Trafficking	REAC:R-DRE-199991	0.0242169	1.61588	481	260	34	7340	COPZ1,RAB30,VPS4B,VAMP2,ARFIP2B,REPS2,PREB,RAB11A,SYT1A,RAB3AB,RAB10,STX6,STAM2,TBC1D14,TJP1B,PPP6R3,RAB41,RAB14,CLVS2,PIP5K1CA,SGIP1A,RAB5AA,CYTH2,VTI1A,RAB33A,GBF1,DNM1A,DNM2A,SH3GL1B,RAB6BA,HIP1RB,RABEPK,STX18,RAB43
male	MEred	HP	Involuntary movements	HP:0004305	3.19375e-05	4.4957	1257	185	79	5148	CUL4B,GABRG2,ATAD1A,RAB39BA,MAPTB,GRIN1A,FXR1,SLC2A1B,GABRA1,ELOVL4A,CERS1,CASKA,OPA1,OPHN1,KCNAB2A,VAPB,SLC25A42,TRAF7,PDK3A,CHD1,SYT1A,MFN2,POMGNT1,UBTF,TOMM40L,TMEM106BB,SLC37A4B,DNAJC5AB,KCTD17,EXT2,ZGC:154046,DNAJC5AA,RORB,TNIKA,XPA,SLC6A1A,RFT1,EXTL3,PMPCA,ABHD11,LETM1,VLDLR,LIMK1A,KIF1AA,EBF3A,IL17RD,LNPK,STXBP1A,CAMK2B1,BRSK2A,SLC6A8,CACNA1G,ZEB2B,REEP2,GTPBP2B,SPARTB,DNM1A,NBEAB,TRPM3,ZF…
male	MEred	HP	Abnormal central motor function	HP:0011442	0.000121952	3.91381	2161	185	113	5148	CUL4B,PDP1,GABRG2,DDX3XA,ATAD1A,RAB39BA,MAPTB,TMTC3,GRIN1A,FXR1,SLC2A1B,GABRA1,TIA1L,ELOVL4A,CERS1,CASKA,OPA1,OPHN1,PRKAR1B,KCNAB2A,CEP290,VAPB,SLC25A42,ACSL4A,RFXANK,TRAF7,PDK3A,CHD1,SYT1A,SLC19A2,MFN2,POMGNT1,UBTF,TOMM40L,TMEM106BB,SLC37A4B,DNAJC5AB,KCTD17,EXT2,EXOC8,ZGC:154046,DNAJC5AA,RORB,TSPAN7B,PCLOA,GNAL2,TNIKA,XPA,GNB5B,GAD1B,SLC6A1A,RFT1,MLH1,EXTL3,PMPCA,ABHD11,SLC9A7,LETM1,VLDLR,LIMK1A…
male	MEred	HP	Generalized-onset seizure	HP:0002197	0.000181024	3.74226	432	185	38	5148	GABRG2,RAB39BA,GRIN1A,SLC2A1B,GABRA1,ELOVL4A,CASKA,OPHN1,ACSL4A,EXOC8,RORB,TSPAN7B,TNIKA,GAD1B,SLC6A1A,EXTL3,SLC9A7,KIF1AA,LNPK,STXBP1A,CAMK2B1,BRSK2A,GAD1A,ZEB2B,DNM1A,NBEAB,TRPM3,KCNJ10A,MED12,KCNA1A,ROBO4,ND1,STX1B,KCNMA1A,TRIT1,PCDH19,PRSS12,ATP6
male	MEred	HP	Abnormality of movement	HP:0100022	0.000425771	3.37082	2259	185	115	5148	CUL4B,PDP1,GABRG2,MYO1HA,DDX3XA,ATAD1A,RAB39BA,MAPTB,GRIN1A,FXR1,SLC2A1B,GABRA1,TIA1L,CDK5,ELOVL4A,CERS1,CASKA,OPA1,OPHN1,PRKAR1B,KCNAB2A,VAPB,SLC25A42,ACSL4A,RFXANK,TRAF7,PREPL,PDK3A,CHD1,SYT1A,MFN2,POMGNT1,UBTF,TOMM40L,TMEM106BB,SLC37A4B,DNAJC5AB,KCTD17,EXT2,EXOC8,ZGC:154046,DNAJC5AA,RORB,TSPAN7B,PCLOA,GNAL2,TNIKA,XPA,GAD1B,SLC6A1A,RFT1,MLH1,EXTL3,PMPCA,CNTN1B,ABHD11,SLC9A7,LETM1,VLDLR,MAK,LIMK…
male	MEred	HP	Generalized non-motor (absence) seizure	HP:0002121	0.00113697	2.94425	219	185	24	5148	GABRG2,RAB39BA,GRIN1A,SLC2A1B,GABRA1,CASKA,ACSL4A,RORB,TSPAN7B,SLC6A1A,SLC9A7,KIF1AA,STXBP1A,CAMK2B1,BRSK2A,ZEB2B,DNM1A,NBEAB,TRPM3,MED12,KCNA1A,STX1B,KCNMA1A,PCDH19
male	MEred	HP	Myoclonic seizure	HP:0032794	0.00135084	2.8694	237	185	25	5148	GABRG2,GRIN1A,SLC2A1B,GABRA1,ELOVL4A,OPHN1,EXOC8,GAD1B,SLC6A1A,EXTL3,KIF1AA,LNPK,STXBP1A,CAMK2B1,BRSK2A,GAD1A,DNM1A,NBEAB,TRPM3,ND1,STX1B,KCNMA1A,TRIT1,PCDH19,ATP6
male	MEred	HP	Non-motor seizure	HP:0033259	0.0015833	2.80044	239	185	25	5148	GABRG2,RAB39BA,GRIN1A,SLC2A1B,GABRA1,CASKA,ACSL4A,RORB,TSPAN7B,SLC6A1A,SLC9A7,KIF1AA,STXBP1A,CAMK2B1,BRSK2A,ZEB2B,DNM1A,NBEAB,TRPM3,MED12,KCNA1A,ROBO4,STX1B,KCNMA1A,PCDH19
male	MEred	HP	Generalized-onset motor seizure	HP:0032677	0.00252	2.5986	245	185	25	5148	GABRG2,GRIN1A,SLC2A1B,GABRA1,ELOVL4A,CASKA,OPHN1,EXOC8,GAD1B,SLC6A1A,KIF1AA,LNPK,STXBP1A,CAMK2B1,BRSK2A,GAD1A,DNM1A,NBEAB,TRPM3,KCNA1A,ND1,STX1B,TRIT1,PCDH19,ATP6
male	MEred	HP	Bilateral tonic-clonic seizure	HP:0002069	0.0026525	2.57634	367	185	32	5148	GABRG2,RAB39BA,MAPTB,GRIN1A,SLC2A1B,GABRA1,CERS1,CASKA,ACSL4A,TMEM106BB,EXOC8,RORB,TSPAN7B,GAD1B,SLC6A1A,SLC9A7,KIF1AA,STXBP1A,CAMK2B1,BRSK2A,GAD1A,DNM1A,NBEAB,TRPM3,MED12,KCNA1A,ROBO4,ND1,STX1B,KCNMA1A,PCDH19,ATP6
male	MEred	HP	Atonic seizure	HP:0010819	0.0043289	2.36362	129	185	17	5148	GABRG2,GRIN1A,SLC2A1B,GABRA1,CASKA,SLC6A1A,KIF1AA,STXBP1A,CAMK2B1,BRSK2A,DNM1A,NBEAB,TRPM3,AKT3A,KCNA1A,STX1B,PCDH19
male	MEred	HP	Upper motor neuron dysfunction	HP:0002493	0.00745163	2.12775	1322	185	75	5148	GABRG2,DDX3XA,ATAD1A,RAB39BA,MAPTB,TMTC3,GRIN1A,SLC2A1B,ELOVL4A,CASKA,OPA1,OPHN1,KCNAB2A,CEP290,VAPB,ACSL4A,TRAF7,MFN2,POMGNT1,UBTF,TMEM106BB,SLC37A4B,EXOC8,TSPAN7B,PCLOA,TNIKA,XPA,GAD1B,SLC6A1A,RFT1,MLH1,EXTL3,PMPCA,ABHD11,SLC9A7,LIMK1A,KIF1AA,IL17RD,RNF216,KANK1A,STXBP1A,LIFRA,CAMK2B1,BRSK2A,GAD1A,PIGU,SLC6A8,CACNA1G,ALG9,ZEB2B,REEP2,GTPBP2B,SPARTB,DNM1A,NBEAB,TRPM3,ZFR,AKT3A,CAV1,DDHD2,DSTYK,M…
male	MEred	HP	Dialeptic seizure	HP:0011146	0.0112937	1.94716	266	185	25	5148	GABRG2,RAB39BA,GRIN1A,SLC2A1B,GABRA1,CASKA,OPHN1,ACSL4A,RORB,TSPAN7B,SLC6A1A,SLC9A7,KIF1AA,STXBP1A,CAMK2B1,BRSK2A,ZEB2B,DNM1A,NBEAB,TRPM3,MED12,KCNA1A,STX1B,KCNMA1A,PCDH19
male	MEred	HP	Gait disturbance	HP:0001288	0.0155265	1.80893	1274	185	72	5148	CUL4B,PDP1,GABRG2,MYO1HA,DDX3XA,ATAD1A,RAB39BA,MAPTB,GRIN1A,SLC2A1B,GABRA1,TIA1L,ELOVL4A,CASKA,OPA1,OPHN1,PRKAR1B,KCNAB2A,RFXANK,TRAF7,PREPL,PDK3A,SYT1A,MFN2,POMGNT1,UBTF,TMEM106BB,SLC37A4B,EXT2,ZGC:154046,SLC6A1A,MLH1,EXTL3,PMPCA,ABHD11,VLDLR,LIMK1A,KIF1AA,EBF3A,IL17RD,SGCB,LNPK,STXBP1A,LIFRA,CAMK2B1,SLC6A8,CACNA1G,ZEB2B,REEP2,GTPBP2B,SPARTB,DNM1A,NBEAB,ZFR,KCNJ10A,HPCA,CAV1,GNB4A,DDHD2,DNM2A,DS…
male	MEred	HP	Impaired visuospatial constructive cognition	HP:0010794	0.0187338	1.72737	32	185	8	5148	GABRG2,MAPTB,SLC2A1B,GABRA1,PRKAR1B,PMPCA,POMT1,ND1
male	MEred	HP	Intellectual disability, profound	HP:0002187	0.0222701	1.65228	192	185	20	5148	RAB39BA,GRIN1A,ELOVL4A,ACSL4A,POMGNT1,UBTF,TSPAN7B,GAD1B,SLC9A7,KIF1AA,STXBP1A,CAMK2B1,BRSK2A,GAD1A,PIGU,NBEAB,TRPM3,MED12,POMT1,PCDH19
male	MEred	HP	Generalized myoclonic seizure	HP:0002123	0.03029	1.5187	196	185	20	5148	GABRG2,GRIN1A,SLC2A1B,GABRA1,ELOVL4A,OPHN1,SLC6A1A,KIF1AA,LNPK,STXBP1A,CAMK2B1,BRSK2A,DNM1A,NBEAB,TRPM3,ND1,STX1B,TRIT1,PCDH19,ATP6
male	MEred	HP	Abnormality of higher mental function	HP:0011446	0.0483667	1.31545	2877	185	130	5148	CUL4B,PDP1,GABRG2,MYO1HA,DDX3XA,ATAD1A,RAB39BA,MAPTB,TMTC3,KDSR,GRIN1A,SLC2A1B,GABRA1,TIA1L,ELOVL4A,CERS1,CASKA,OPA1,OPHN1,PRKAR1B,KCNAB2A,CEP290,VAPB,SLC25A42,ACSL4A,RFXANK,TRAF7,PREPL,CHD1,SYT1A,SLC19A2,MFN2,POMGNT1,NHSB,UBTF,TOMM40L,TMEM106BB,SLC37A4B,DIS3L2,DNAJC5AB,KCTD17,EXT2,ZGC:154046,DNAJC5AA,RORB,TSPAN7B,IRF5,GNAL2,TNIKA,SOBPA,XPA,GNB5B,GAD1B,SLC6A1A,RFT1,MLH1,EXTL3,PMPCA,ABHD11,RB1,SLC…
female	DEGs	GO:MF	RNA binding	GO:0003723	0.00205806	2.68654	938	166	21	22630	CELF1,PSPC1,HNRNPK,ELAVL1B,HNRNPDL,NSUN2,YBX1,LSM14AB,SRSF11,SEC63,HNRNPA3,DDX5,SF1,DDX17,EIF3C,DGCR8,HNRNPABB,CIRBPA,TIA1,ILF3B,SRSF6B
female	DEGs	GO:MF	phosphotransferase activity, nitrogenous group as acceptor	GO:0016775	0.0305375	1.51517	12	166	3	22630	CKMB,CKMT2A,CKMA
female	DEGs	GO:MF	creatine kinase activity	GO:0004111	0.0305375	1.51517	12	166	3	22630	CKMB,CKMT2A,CKMA
female	DEGs	GO:BP	muscle contraction	GO:0006936	2.46e-05	4.60874	124	152	10	20734	MYOM1B,ANK2B,DESMA,ATP2A1,TNNI2B.2,TNNT3B,TNNI2A.1,TNNT3A,TNNC2,LMOD2B
female	DEGs	GO:BP	muscle system process	GO:0003012	2.87e-05	4.54204	126	152	10	20734	MYOM1B,ANK2B,DESMA,ATP2A1,TNNI2B.2,TNNT3B,TNNI2A.1,TNNT3A,TNNC2,LMOD2B
female	DEGs	GO:BP	striated muscle contraction	GO:0006941	0.000106582	3.97232	53	152	7	20734	ANK2B,DESMA,ATP2A1,TNNI2B.2,TNNT3B,TNNI2A.1,TNNC2
female	DEGs	GO:BP	regulation of muscle contraction	GO:0006937	0.000406749	3.39067	40	152	6	20734	ANK2B,DESMA,ATP2A1,TNNT3B,TNNT3A,TNNC2
female	DEGs	GO:BP	regulation of muscle system process	GO:0090257	0.000473609	3.32458	41	152	6	20734	ANK2B,DESMA,ATP2A1,TNNT3B,TNNT3A,TNNC2
female	DEGs	GO:BP	striated muscle cell differentiation	GO:0051146	0.0012996	2.88619	147	152	9	20734	SMO,ACTA1B,DESMA,PGAM2,TNNT3B,CAV3,TTN.1,TNNT3A,LMOD2B
female	DEGs	GO:BP	myofibril assembly	GO:0030239	0.00143568	2.84294	77	152	7	20734	SMO,DESMA,TNNT3B,CAV3,TTN.1,TNNT3A,LMOD2B
female	DEGs	GO:BP	cellular component assembly involved in morphogenesis	GO:0010927	0.00186204	2.73001	80	152	7	20734	SMO,DESMA,TNNT3B,CAV3,TTN.1,TNNT3A,LMOD2B
female	DEGs	GO:BP	striated muscle cell development	GO:0055002	0.00186204	2.73001	80	152	7	20734	SMO,DESMA,TNNT3B,CAV3,TTN.1,TNNT3A,LMOD2B
female	DEGs	GO:BP	regulation of striated muscle contraction	GO:0006942	0.00243024	2.61435	14	152	4	20734	ANK2B,DESMA,ATP2A1,TNNT3B
female	DEGs	GO:BP	actomyosin structure organization	GO:0031032	0.00286974	2.54216	121	152	8	20734	SMO,EPB41L5,DESMA,TNNT3B,CAV3,TTN.1,TNNT3A,LMOD2B
female	DEGs	GO:BP	muscle cell differentiation	GO:0042692	0.00452604	2.34428	171	152	9	20734	SMO,ACTA1B,DESMA,PGAM2,TNNT3B,CAV3,TTN.1,TNNT3A,LMOD2B
female	DEGs	GO:BP	cellular response to unfolded protein	GO:0034620	0.00575999	2.23958	36	152	5	20734	ZGC:85858,SERP2,HSP70.3,SEC63,HSPA5
female	DEGs	GO:BP	muscle cell development	GO:0055001	0.006843	2.16475	136	152	8	20734	SMO,ACTA1B,DESMA,TNNT3B,CAV3,TTN.1,TNNT3A,LMOD2B
female	DEGs	GO:BP	response to unfolded protein	GO:0006986	0.00864249	2.06336	39	152	5	20734	ZGC:85858,SERP2,HSP70.3,SEC63,HSPA5
female	DEGs	GO:BP	RNA splicing	GO:0008380	0.0191043	1.71887	257	152	10	20734	HNRNPK,PRPF31,YBX1,SRSF11,SF1,DDX17,LGALS3A,RTCB,CIRBPA,SRSF6B
female	DEGs	GO:BP	cellular response to topologically incorrect protein	GO:0035967	0.0269846	1.56888	49	152	5	20734	ZGC:85858,SERP2,HSP70.3,SEC63,HSPA5
female	DEGs	GO:BP	endoplasmic reticulum unfolded protein response	GO:0030968	0.0288419	1.53998	25	152	4	20734	ZGC:85858,SERP2,SEC63,HSPA5
female	DEGs	GO:BP	skeletal muscle contraction	GO:0003009	0.033892	1.4699	26	152	4	20734	ATP2A1,TNNI2B.2,TNNI2A.1,TNNC2
female	DEGs	GO:BP	response to topologically incorrect protein	GO:0035966	0.0361339	1.44209	52	152	5	20734	ZGC:85858,SERP2,HSP70.3,SEC63,HSPA5
female	DEGs	GO:BP	multicellular organismal movement	GO:0050879	0.0395601	1.40274	27	152	4	20734	ATP2A1,TNNI2B.2,TNNI2A.1,TNNC2
female	DEGs	GO:BP	musculoskeletal movement	GO:0050881	0.0395601	1.40274	27	152	4	20734	ATP2A1,TNNI2B.2,TNNI2A.1,TNNC2
female	DEGs	GO:BP	muscle structure development	GO:0061061	0.0459442	1.33777	285	152	10	20734	SMO,ACTA1B,DESMA,PGAM2,TNNT3B,CAV3,TTN.1,TNNT3A,MYOD1,LMOD2B
female	DEGs	GO:CC	sarcomere	GO:0030017	4.29e-06	5.36795	105	153	10	18345	MYOM1B,DESMA,ATP2A1,TNNI2B.2,TNNT3B,TNNI2A.1,TNNT3A,TNNC2,MYOZ3A,LMOD2B
female	DEGs	GO:CC	myofibril	GO:0030016	6.72e-06	5.17235	110	153	10	18345	MYOM1B,DESMA,ATP2A1,TNNI2B.2,TNNT3B,TNNI2A.1,TNNT3A,TNNC2,MYOZ3A,LMOD2B
female	DEGs	GO:CC	contractile fiber	GO:0043292	7.34e-06	5.13443	111	153	10	18345	MYOM1B,DESMA,ATP2A1,TNNI2B.2,TNNT3B,TNNI2A.1,TNNT3A,TNNC2,MYOZ3A,LMOD2B
female	DEGs	GO:CC	organelle	GO:0043226	1.79e-05	4.7469	8683	153	105	18345	ZMPSTE24,UGT5E1,MAPRE3A,YY1A,CRY3A,KDM5BB,GRA,MCOLN1A,SLC25A4,PSPC1,SERPINH1B,SGPL1,TCF7L2,BNIP3,IFRD1,SMO,PPHLN1,GUCA1A,ODF2A,SETB,MYOM1B,ACTC1B,TPST1,POLDIP2,IDE,SCDB,ACTA1B,ANK2B,EGLN1B,ITPR1B,HIGD1A,HNRNPK,MAP4L,UBTFL,AMPH,CTNND2B,HMGB3B,SERPINH1A,MED14,PKNOX2,NFIL3,HNRNPDL,KDM6BB,CKMT2A,HSF1,NFE2L3,ZGC:85858,PRELID3A,PRPF31,SNAP91A,CLASP2,NSUN2,TRIM63A,EPB41L5,CRY3B,RBBP5,CERS1,YBX1,SERP2,DE…
female	DEGs	GO:CC	intracellular organelle	GO:0043229	2.9e-05	4.53709	8502	153	103	18345	ZMPSTE24,UGT5E1,MAPRE3A,YY1A,CRY3A,KDM5BB,GRA,MCOLN1A,SLC25A4,PSPC1,SERPINH1B,SGPL1,TCF7L2,BNIP3,IFRD1,PPHLN1,ODF2A,SETB,MYOM1B,ACTC1B,TPST1,POLDIP2,IDE,SCDB,ACTA1B,ANK2B,EGLN1B,ITPR1B,HIGD1A,HNRNPK,MAP4L,UBTFL,AMPH,CTNND2B,HMGB3B,SERPINH1A,MED14,PKNOX2,NFIL3,HNRNPDL,KDM6BB,CKMT2A,HSF1,NFE2L3,ZGC:85858,PRELID3A,PRPF31,SNAP91A,CLASP2,NSUN2,TRIM63A,EPB41L5,CRY3B,RBBP5,CERS1,YBX1,SERP2,DESMA,LSM14AB…
female	DEGs	GO:CC	striated muscle thin filament	GO:0005865	0.000138357	3.859	37	153	6	18345	TNNI2B.2,TNNT3B,TNNI2A.1,TNNT3A,TNNC2,LMOD2B
female	DEGs	GO:CC	myofilament	GO:0036379	0.000138357	3.859	37	153	6	18345	TNNI2B.2,TNNT3B,TNNI2A.1,TNNT3A,TNNC2,LMOD2B
female	DEGs	GO:CC	supramolecular complex	GO:0099080	0.000254968	3.59351	561	153	18	18345	MAPRE3A,GRA,MYOM1B,MAP4L,CLASP2,YBX1,DESMA,LSM14AB,MAPTB,ATP2A1,TNNI2B.2,TNNT3B,TNNI2A.1,TNNT3A,TNNC2,MAPRE1B,MYOZ3A,LMOD2B
female	DEGs	GO:CC	troponin complex	GO:0005861	0.000635483	3.1969	27	153	5	18345	TNNI2B.2,TNNT3B,TNNI2A.1,TNNT3A,TNNC2
female	DEGs	GO:CC	intracellular anatomical structure	GO:0005622	0.00288052	2.54053	10477	153	113	18345	ZMPSTE24,UGT5E1,MAPRE3A,YY1A,CRY3A,KDM5BB,GRA,MCOLN1A,SLC25A4,PSPC1,SERPINH1B,SGPL1,TCF7L2,BNIP3,IFRD1,GDI2,PPHLN1,ODF2A,SETB,MYOM1B,ACTC1B,TPST1,POLDIP2,IDE,SCDB,ACTA1B,ANK2B,EGLN1B,ITPR1B,HIGD1A,HNRNPK,GLULA,MAP4L,UBTFL,AMPH,CTNND2B,HMGB3B,SERPINH1A,MED14,PKNOX2,NFIL3,HNRNPDL,KDM6BB,CKMT2A,HSF1,NFE2L3,ZGC:85858,PRELID3A,PRPF31,SNAP91A,CLASP2,NSUN2,TRIM63A,EPB41L5,CRY3B,RBBP5,CERS1,YBX1,SERP2,DE…
female	DEGs	GO:CC	supramolecular fiber	GO:0099512	0.00535356	2.27136	445	153	14	18345	MAPRE3A,MYOM1B,MAP4L,DESMA,MAPTB,ATP2A1,TNNI2B.2,TNNT3B,TNNI2A.1,TNNT3A,TNNC2,MAPRE1B,MYOZ3A,LMOD2B
female	DEGs	GO:CC	supramolecular polymer	GO:0099081	0.00576503	2.2392	448	153	14	18345	MAPRE3A,MYOM1B,MAP4L,DESMA,MAPTB,ATP2A1,TNNI2B.2,TNNT3B,TNNI2A.1,TNNT3A,TNNC2,MAPRE1B,MYOZ3A,LMOD2B
female	DEGs	GO:CC	cytoplasm	GO:0005737	0.0435479	1.36103	6483	153	76	18345	ZMPSTE24,MAPRE3A,CRY3A,GRA,MCOLN1A,SLC25A4,SERPINH1B,SGPL1,BNIP3,GDI2,ODF2A,MYOM1B,TPST1,POLDIP2,IDE,SCDB,EGLN1B,ITPR1B,HIGD1A,HNRNPK,GLULA,MAP4L,AMPH,CTNND2B,SERPINH1A,HNRNPDL,CKMT2A,ZGC:85858,PRELID3A,SNAP91A,CLASP2,NSUN2,EPB41L5,CRY3B,CERS1,YBX1,SERP2,DESMA,LSM14AB,MAPTB,HSP70.3,ATP2A1,SNN,TNNI2B.2,TNNT3B,PFKMB,CAV3,HSP90AA1.2,AMPD3A,ATP2A1L,SEC63,DPP3,PLEKHA8,OPA1,TNNI2A.1,TNNT3A,PRKAG3A,B3GA…
female	DEGs	KEGG	Protein processing in endoplasmic reticulum	KEGG:04141	0.010924	1.96162	161	57	8	5317	DNAJB1A,HSP70.3,HSP90AA1.2,SEC63,NSFL1C,DNAJC5AB,SSR1,HSPA5
female	DEGs	REAC	Striated Muscle Contraction	REAC:R-DRE-390522	0.000224088	3.64958	47	82	7	7340	ACTC1B,ACTA1B,TNNI2B.2,TNNT3B,TNNI2A.1,TNNC2,MYLZ3
female	DEGs	REAC	Muscle contraction	REAC:R-DRE-397014	0.000857724	3.06665	172	82	11	7340	ACTC1B,ACTA1B,ITPR1B,ATP2A1,MYLPFA,ATP1A1B,TNNI2B.2,TNNT3B,TNNI2A.1,TNNC2,MYLZ3
female	DEGs	REAC	Regulation of HSF1-mediated heat shock response	REAC:R-DRE-3371453	0.0240604	1.6187	65	82	6	7340	HSPA13,DNAJB1A,HSP70.3,HIKESHI,HSPA5,HSPA4A
female	DEGs	HP	Round ear	HP:0100830	0.00906189	2.04278	11	61	4	4973	TNNI2B.2,TNNT3B,TNNI2A.1,TNNT3A
female	DEGs	HP	Ulnar deviation of finger	HP:0009465	0.0105129	1.97828	40	61	6	4973	RAB3GAP1,TNNI2B.2,TNNT3B,TNNI2A.1,TNNT3A,HRASA
female	DEGs	HP	Distal arthrogryposis	HP:0005684	0.0181312	1.74157	26	61	5	4973	YY1A,TNNI2B.2,YY1B,TNNI2A.1,MYOD1
male	DEGs	GO:MF	RNA binding	GO:0003723	7.08e-07	6.14991	938	159	26	22630	U2AF2B,EIF3C,CELF1,TIAL1,DDX17,SRSF11,HNRNPM,SRSF6B,HNRNPA3,TRA2A,PUF60A,PAPOLA,HNRNPH1,G3BP1,SFPQ,DDX23,NPM1B,CIRBPB,NSUN2,HNRNPL2,KHDRBS1A,HNRNPABB,CELF3B,PUM1,CIRBPA,CELF3A
male	DEGs	GO:MF	nucleic acid binding	GO:0003676	1.41333e-06	5.84976	3889	159	58	22630	U2AF2B,CRY3B,TCF3B,HSF1,EIF3C,KDM5BB,CELF1,TIAL1,CRY3A,DDX17,RXRBA,ARNT2,HNRNPA1A,SRSF11,CREB1B,THAP3,ATF7B,CNOT7,HNRNPM,SAFB,RBM5,SRSF6B,HNRNPA3,TRA2A,EIF4A2,PUF60A,PAPOLA,DBX1B,DHX30,HNRNPH1,ATF4B,ERCC5,SI:DKEY-56E3.3,G3BP1,SFPQ,DDX23,NPM1B,HMGB1B,FBXL6,CIRBPB,HMGB1A,NSUN2,HNRNPL2,HMGB3B,KHDRBS1A,HMGN2,DBPB,HNRNPABB,CELF3B,KDM6BB,ZGC:110224,FOXP2,NR1D1,PUM1,JARID2A,CIRBPA,CELF3A,NCL
male	DEGs	GO:MF	heterocyclic compound binding	GO:1901363	6.76635e-05	4.16965	6964	159	80	22630	U2AF2B,CRY3B,CNGB3.1,TCF3B,MARK3B,HSP70.3,HSF1,HSP90AA1.2,MYO1HA,EIF3C,KDM5BB,CELF1,HSPA5,TIAL1,CRY3A,DDX17,RXRBA,ARNT2,HNRNPA1A,SRSF11,HSPA4A,CREB1B,THAP3,ATF7B,CNOT7,CLK4A,HNRNPM,CTBP2A,SAFB,RBM5,SRSF6B,HNRNPA3,TRA2A,CHD4A,EIF4A2,PUF60A,PAPOLA,DBX1B,DHX30,HNRNPH1,DNAJA1,ATF4B,ERCC5,SI:DKEY-56E3.3,G3BP1,SFPQ,SCYL1,GPD1L,MAP2K4A,HBS1L,DDX23,ZGC:65894,NPM1B,ACAD9,HMGB1B,FBXL6,CIRBPB,HMGB1A,CLPXA,H…
male	DEGs	GO:MF	organic cyclic compound binding	GO:0097159	8.87166e-05	4.052	7005	159	80	22630	U2AF2B,CRY3B,CNGB3.1,TCF3B,MARK3B,HSP70.3,HSF1,HSP90AA1.2,MYO1HA,EIF3C,KDM5BB,CELF1,HSPA5,TIAL1,CRY3A,DDX17,RXRBA,ARNT2,HNRNPA1A,SRSF11,HSPA4A,CREB1B,THAP3,ATF7B,CNOT7,CLK4A,HNRNPM,CTBP2A,SAFB,RBM5,SRSF6B,HNRNPA3,TRA2A,CHD4A,EIF4A2,PUF60A,PAPOLA,DBX1B,DHX30,HNRNPH1,DNAJA1,ATF4B,ERCC5,SI:DKEY-56E3.3,G3BP1,SFPQ,SCYL1,GPD1L,MAP2K4A,HBS1L,DDX23,ZGC:65894,NPM1B,ACAD9,HMGB1B,FBXL6,CIRBPB,HMGB1A,CLPXA,H…
male	DEGs	GO:MF	unfolded protein binding	GO:0051082	0.000672827	3.1721	83	159	7	22630	HSP70.3,HSP90AA1.2,DNAJB1B,HSPA5,DNAJB1A,DNAJA1,CLPXA
male	DEGs	GO:MF	DNA binding, bending	GO:0008301	0.00399615	2.39836	7	159	3	22630	HMGB1B,HMGB1A,HMGB3B
male	DEGs	GO:BP	RNA splicing	GO:0008380	4.43e-09	8.35311	257	148	17	20734	U2AF2B,DDX17,SRSF11,HNRNPM,RBM5,SRSF6B,TRA2A,PUF60A,HNRNPH1,SFPQ,DDX23,CIRBPB,HNRNPL2,KHDRBS1A,LGALS3A,CELF3B,CIRBPA
male	DEGs	GO:BP	RNA processing	GO:0006396	6.11e-07	6.21419	746	148	24	20734	U2AF2B,SI:CH211-114C17.1,DDX17,SRSF11,SRRT,HNRNPM,SAFB,RBM5,SRSF6B,TRA2A,PUF60A,PAPOLA,HNRNPH1,SFPQ,DDX23,CIRBPB,NSUN2,NOB1,HNRNPL2,KHDRBS1A,LGALS3A,CELF3B,PUM1,CIRBPA
male	DEGs	GO:BP	mRNA metabolic process	GO:0016071	8.07e-07	6.09332	516	148	20	20734	U2AF2B,DDX17,SRRT,HNRNPM,SAFB,RBM5,SRSF6B,TRA2A,PUF60A,PAPOLA,FASTKD3,SFPQ,DDX23,CIRBPB,NSUN2,HNRNPL2,KHDRBS1A,CELF3B,PUM1,CIRBPA
male	DEGs	GO:BP	mRNA splicing, via spliceosome	GO:0000398	1.48728e-06	5.82761	195	148	13	20734	DDX17,HNRNPM,RBM5,SRSF6B,TRA2A,PUF60A,SFPQ,DDX23,CIRBPB,HNRNPL2,KHDRBS1A,CELF3B,CIRBPA
male	DEGs	GO:BP	RNA splicing, via transesterification reactions with bulged adenosine as nucleophile	GO:0000377	1.48728e-06	5.82761	195	148	13	20734	DDX17,HNRNPM,RBM5,SRSF6B,TRA2A,PUF60A,SFPQ,DDX23,CIRBPB,HNRNPL2,KHDRBS1A,CELF3B,CIRBPA
male	DEGs	GO:BP	RNA splicing, via transesterification reactions	GO:0000375	1.48728e-06	5.82761	195	148	13	20734	DDX17,HNRNPM,RBM5,SRSF6B,TRA2A,PUF60A,SFPQ,DDX23,CIRBPB,HNRNPL2,KHDRBS1A,CELF3B,CIRBPA
male	DEGs	GO:BP	regulation of mRNA metabolic process	GO:1903311	1.80939e-06	5.74247	127	148	11	20734	HNRNPM,SAFB,RBM5,TRA2A,PUF60A,FASTKD3,CIRBPB,KHDRBS1A,CELF3B,PUM1,CIRBPA
male	DEGs	GO:BP	mRNA processing	GO:0006397	8.0824e-06	5.09246	418	148	17	20734	U2AF2B,DDX17,SRRT,HNRNPM,SAFB,RBM5,SRSF6B,TRA2A,PUF60A,PAPOLA,SFPQ,DDX23,CIRBPB,HNRNPL2,KHDRBS1A,CELF3B,CIRBPA
male	DEGs	GO:BP	alternative mRNA splicing, via spliceosome	GO:0000380	8.4159e-06	5.0749	38	148	7	20734	DDX17,HNRNPM,RBM5,SRSF6B,PUF60A,KHDRBS1A,CELF3B
male	DEGs	GO:BP	regulation of mRNA processing	GO:0050684	1.02128e-05	4.99085	60	148	8	20734	SAFB,RBM5,TRA2A,PUF60A,CIRBPB,KHDRBS1A,CELF3B,CIRBPA
male	DEGs	GO:BP	regulation of mRNA splicing, via spliceosome	GO:0048024	3.97496e-05	4.40067	47	148	7	20734	RBM5,TRA2A,PUF60A,CIRBPB,KHDRBS1A,CELF3B,CIRBPA
male	DEGs	GO:BP	regulation of RNA splicing	GO:0043484	6.83637e-05	4.16517	76	148	8	20734	RBM5,TRA2A,PUF60A,HNRNPH1,CIRBPB,KHDRBS1A,CELF3B,CIRBPA
male	DEGs	GO:BP	RNA metabolic process	GO:0016070	7.19089e-05	4.14322	3847	148	55	20734	U2AF2B,CRY3B,TCF3B,MED16,SI:CH211-114C17.1,HSF1,CRY3A,DDX17,RXRBA,ARNT2,SRSF11,CREB1B,ATF7B,DOT1L,SRRT,CNOT7,HNRNPM,CTBP2A,SAFB,PHF20A,RBM5,SRSF6B,SS18,TRA2A,PUF60A,PAPOLA,DBX1B,FASTKD3,MTDHA,HNRNPH1,ATF4B,SI:DKEY-56E3.3,SFPQ,DDX23,NPM1B,HMGB1B,FBXL6,CIRBPB,HMGB1A,NSUN2,NOB1,HNRNPL2,CARS2,HMGB3B,KHDRBS1A,LGALS3A,DBPB,RYBPA,CELF3B,PPHLN1,FOXP2,WWP2,NR1D1,PUM1,CIRBPA
male	DEGs	GO:BP	gene expression	GO:0010467	0.000371136	3.43047	4486	148	59	20734	U2AF2B,CRY3B,TCF3B,MED16,SI:CH211-114C17.1,HSF1,EIF3C,CRY3A,DDX17,RXRBA,ARNT2,SRSF11,CREB1B,ATF7B,DOT1L,SRRT,CNOT7,HNRNPM,CTBP2A,SAFB,PHF20A,RBM5,SRSF6B,SS18,TRA2A,PUF60A,PAPOLA,DBX1B,FASTKD3,MTDHA,HNRNPH1,ATF4B,SI:DKEY-56E3.3,SFPQ,DDX23,NPM1B,HMGB1B,FBXL6,CIRBPB,HMGB1A,NSUN2,NOB1,HNRNPL2,CARS2,HMGB3B,PISD,KHDRBS1A,LGALS3A,DBPB,HNRNPABB,RYBPA,CELF3B,KDM6BB,PPHLN1,FOXP2,WWP2,NR1D1,PUM1,CIRBPA
male	DEGs	GO:BP	nucleic acid metabolic process	GO:0090304	0.000475067	3.32324	4290	148	57	20734	U2AF2B,CRY3B,TCF3B,MED16,SI:CH211-114C17.1,HSF1,CRY3A,DDX17,RXRBA,ARNT2,SRSF11,CREB1B,ATF7B,DOT1L,SRRT,CNOT7,HNRNPM,CTBP2A,SAFB,PHF20A,RBM5,SRSF6B,SS18,TRA2A,PUF60A,PAPOLA,DBX1B,FASTKD3,MTDHA,HNRNPH1,ATF4B,ERCC5,SI:DKEY-56E3.3,SFPQ,DDX23,NPM1B,HMGB1B,FBXL6,CIRBPB,HMGB1A,NSUN2,NOB1,HNRNPL2,CARS2,HMGB3B,KHDRBS1A,LGALS3A,DBPB,RYBPA,CELF3B,ZGC:110224,PPHLN1,FOXP2,WWP2,NR1D1,PUM1,CIRBPA
male	DEGs	GO:BP	response to temperature stimulus	GO:0009266	0.000661177	3.17968	44	148	6	20734	HSF1,HSP90AA1.2,CRY3A,DNAJA1,CIRBPB,HMGB1A
male	DEGs	GO:BP	nucleobase-containing compound metabolic process	GO:0006139	0.00260507	2.58418	4745	148	59	20734	U2AF2B,CRY3B,TCF3B,MED16,SI:CH211-114C17.1,HSF1,SI:DKEY-190G11.3,CRY3A,DDX17,RXRBA,ARNT2,SRSF11,CREB1B,ATF7B,DOT1L,SRRT,CNOT7,HNRNPM,CTBP2A,SAFB,PHF20A,RBM5,SRSF6B,SS18,TRA2A,PUF60A,PAPOLA,DBX1B,FASTKD3,MTDHA,HNRNPH1,ATF4B,ERCC5,SI:DKEY-56E3.3,SFPQ,DDX23,NPM1B,HMGB1B,FBXL6,CIRBPB,HMGB1A,ALDOAA,NSUN2,NOB1,HNRNPL2,CARS2,HMGB3B,KHDRBS1A,LGALS3A,DBPB,RYBPA,CELF3B,ZGC:110224,PPHLN1,FOXP2,WWP2,NR1D1,PU…
male	DEGs	GO:BP	heterocycle metabolic process	GO:0046483	0.00560778	2.25121	4855	148	59	20734	U2AF2B,CRY3B,TCF3B,MED16,SI:CH211-114C17.1,HSF1,SI:DKEY-190G11.3,CRY3A,DDX17,RXRBA,ARNT2,SRSF11,CREB1B,ATF7B,DOT1L,SRRT,CNOT7,HNRNPM,CTBP2A,SAFB,PHF20A,RBM5,SRSF6B,SS18,TRA2A,PUF60A,PAPOLA,DBX1B,FASTKD3,MTDHA,HNRNPH1,ATF4B,ERCC5,SI:DKEY-56E3.3,SFPQ,DDX23,NPM1B,HMGB1B,FBXL6,CIRBPB,HMGB1A,ALDOAA,NSUN2,NOB1,HNRNPL2,CARS2,HMGB3B,KHDRBS1A,LGALS3A,DBPB,RYBPA,CELF3B,ZGC:110224,PPHLN1,FOXP2,WWP2,NR1D1,PU…
male	DEGs	GO:BP	protein folding	GO:0006457	0.00628386	2.20177	137	148	8	20734	HSP70.3,HSP90AA1.2,DNAJB1B,HSPA5,DNAJB1A,FKBP4,DNAJA1,CLPXA
male	DEGs	GO:BP	cellular aromatic compound metabolic process	GO:0006725	0.00646624	2.18935	4876	148	59	20734	U2AF2B,CRY3B,TCF3B,MED16,SI:CH211-114C17.1,HSF1,SI:DKEY-190G11.3,CRY3A,DDX17,RXRBA,ARNT2,SRSF11,CREB1B,ATF7B,DOT1L,SRRT,CNOT7,HNRNPM,CTBP2A,SAFB,PHF20A,RBM5,SRSF6B,SS18,TRA2A,PUF60A,PAPOLA,DBX1B,FASTKD3,MTDHA,HNRNPH1,ATF4B,ERCC5,SI:DKEY-56E3.3,SFPQ,DDX23,NPM1B,HMGB1B,FBXL6,CIRBPB,HMGB1A,ALDOAA,NSUN2,NOB1,HNRNPL2,CARS2,HMGB3B,KHDRBS1A,LGALS3A,DBPB,RYBPA,CELF3B,ZGC:110224,PPHLN1,FOXP2,WWP2,NR1D1,PU…
male	DEGs	GO:BP	regulation of nucleobase-containing compound metabolic process	GO:0019219	0.00811899	2.0905	2995	148	42	20734	CRY3B,TCF3B,MED16,HSF1,SI:DKEY-190G11.3,CRY3A,RXRBA,ARNT2,CREB1B,ATF7B,DOT1L,HNRNPM,CTBP2A,SAFB,PHF20A,RBM5,SS18,TRA2A,PUF60A,DBX1B,FASTKD3,MTDHA,HNRNPH1,ATF4B,SI:DKEY-56E3.3,SFPQ,NPM1B,HMGB1B,FBXL6,CIRBPB,HMGB1A,HMGB3B,KHDRBS1A,DBPB,RYBPA,CELF3B,PPHLN1,FOXP2,WWP2,NR1D1,PUM1,CIRBPA
male	DEGs	GO:BP	regulation of RNA metabolic process	GO:0051252	0.0109729	1.95968	2925	148	41	20734	CRY3B,TCF3B,MED16,HSF1,CRY3A,RXRBA,ARNT2,CREB1B,ATF7B,DOT1L,HNRNPM,CTBP2A,SAFB,PHF20A,RBM5,SS18,TRA2A,PUF60A,DBX1B,FASTKD3,MTDHA,HNRNPH1,ATF4B,SI:DKEY-56E3.3,SFPQ,NPM1B,HMGB1B,FBXL6,CIRBPB,HMGB1A,HMGB3B,KHDRBS1A,DBPB,RYBPA,CELF3B,PPHLN1,FOXP2,WWP2,NR1D1,PUM1,CIRBPA
male	DEGs	GO:BP	regulation of gene expression	GO:0010468	0.0122166	1.91305	3260	148	44	20734	CRY3B,TCF3B,MED16,HSF1,CRY3A,RXRBA,ARNT2,CREB1B,ATF7B,DOT1L,CNOT7,HNRNPM,CTBP2A,SAFB,PHF20A,RBM5,SS18,TRA2A,PUF60A,DBX1B,FASTKD3,MTDHA,HNRNPH1,ATF4B,SI:DKEY-56E3.3,SFPQ,NPM1B,HMGB1B,FBXL6,CIRBPB,HMGB1A,HMGB3B,KHDRBS1A,DBPB,HNRNPABB,RYBPA,CELF3B,KDM6BB,PPHLN1,FOXP2,WWP2,NR1D1,PUM1,CIRBPA
male	DEGs	GO:BP	organic cyclic compound metabolic process	GO:1901360	0.0122881	1.91051	4973	148	59	20734	U2AF2B,CRY3B,TCF3B,MED16,SI:CH211-114C17.1,HSF1,SI:DKEY-190G11.3,CRY3A,DDX17,RXRBA,ARNT2,SRSF11,CREB1B,ATF7B,DOT1L,SRRT,CNOT7,HNRNPM,CTBP2A,SAFB,PHF20A,RBM5,SRSF6B,SS18,TRA2A,PUF60A,PAPOLA,DBX1B,FASTKD3,MTDHA,HNRNPH1,ATF4B,ERCC5,SI:DKEY-56E3.3,SFPQ,DDX23,NPM1B,HMGB1B,FBXL6,CIRBPB,HMGB1A,ALDOAA,NSUN2,NOB1,HNRNPL2,CARS2,HMGB3B,KHDRBS1A,LGALS3A,DBPB,RYBPA,CELF3B,ZGC:110224,PPHLN1,FOXP2,WWP2,NR1D1,PU…
male	DEGs	GO:BP	macromolecule metabolic process	GO:0043170	0.0189819	1.72166	8780	148	88	20734	U2AF2B,SERPINH1B,CRY3B,TCF3B,MED16,MARK3B,SI:CH211-114C17.1,HSF1,EIF3C,KDM5BB,HSPA5,SI:DKEY-190G11.3,OGT.1,CRY3A,DDX17,RXRBA,ARNT2,SRSF11,CREB1B,ATF7B,DOT1L,SRRT,CNOT7,P4HA1A,CLK4A,HNRNPM,CTBP2A,SAFB,ZGC:136971,PHF20A,RBM5,SRSF6B,SS18,TRA2A,PUF60A,PAPOLA,DBX1B,FASTKD3,MTDHA,FKBP4,HNRNPH1,EGLN1B,ATF4B,ERCC5,SI:DKEY-56E3.3,CUL4B,SFPQ,USP5,SCYL1,MAP2K4A,DDX23,IDE,MTMR6,NPM1B,ASPH,BACE1,HMGB1B,FBXL6,…
male	DEGs	GO:BP	positive regulation of mRNA splicing, via spliceosome	GO:0048026	0.0190598	1.71988	8	148	3	20734	TRA2A,CIRBPB,CIRBPA
male	DEGs	GO:BP	positive regulation of mRNA processing	GO:0050685	0.0190598	1.71988	8	148	3	20734	TRA2A,CIRBPB,CIRBPA
male	DEGs	GO:BP	positive regulation of RNA splicing	GO:0033120	0.02844	1.54607	9	148	3	20734	TRA2A,CIRBPB,CIRBPA
male	DEGs	GO:BP	cellular nitrogen compound metabolic process	GO:0034641	0.0368461	1.43361	5392	148	61	20734	U2AF2B,CRY3B,TCF3B,MED16,SI:CH211-114C17.1,HSF1,EIF3C,SI:DKEY-190G11.3,CRY3A,DDX17,RXRBA,ARNT2,SRSF11,CREB1B,ATF7B,DOT1L,SRRT,CNOT7,HNRNPM,CTBP2A,SAFB,PHF20A,RBM5,SRSF6B,SS18,TRA2A,PUF60A,PAPOLA,DBX1B,FASTKD3,MTDHA,HNRNPH1,ATF4B,ERCC5,SI:DKEY-56E3.3,SFPQ,DDX23,IDE,NPM1B,HMGB1B,FBXL6,CIRBPB,HMGB1A,ALDOAA,NSUN2,NOB1,HNRNPL2,CARS2,HMGB3B,KHDRBS1A,LGALS3A,DBPB,RYBPA,CELF3B,ZGC:110224,PPHLN1,FOXP2,WWP…
male	DEGs	GO:CC	membrane-bounded organelle	GO:0043227	2.9e-08	7.53713	7509	137	93	18345	U2AF2B,SERPINH1B,CRY3B,MED16,HSP70.3,CEP162,HSF1,HSP90AA1.2,MYO1HA,KDM5BB,CTNND2B,CLTCB,HSPA5,SI:DKEY-190G11.3,TSC1A,TRIM33,OGT.1,CRY3A,DDX17,UBAP2B,RXRBA,ARNT2,YLPM1,SRSF11,HSPA4A,CREB1B,ATF7B,DOT1L,CNOT7,P4HA1A,HNRNPM,CTBP2A,SNAP91A,PHF20A,RBM5,SRSF6B,SS18,TRA2A,PUF60A,PAPOLA,MTDHA,PBRM1L,HNRNPH1,EGLN1B,ATF4B,ERCC5,CEPT1B,PEX13,SFPQ,USP5,IPO11,ALDH5A1,MFAP3L,MACO1A,DDX23,IDE,MTMR6,PRELID3A,RETR…
male	DEGs	GO:CC	intracellular membrane-bounded organelle	GO:0043231	4.1e-08	7.3867	7285	137	91	18345	U2AF2B,SERPINH1B,CRY3B,MED16,HSP70.3,HSF1,HSP90AA1.2,KDM5BB,CTNND2B,CLTCB,HSPA5,SI:DKEY-190G11.3,TSC1A,TRIM33,OGT.1,CRY3A,DDX17,UBAP2B,RXRBA,ARNT2,YLPM1,SRSF11,HSPA4A,CREB1B,ATF7B,DOT1L,CNOT7,P4HA1A,HNRNPM,CTBP2A,SNAP91A,PHF20A,RBM5,SRSF6B,SS18,TRA2A,PUF60A,PAPOLA,MTDHA,PBRM1L,HNRNPH1,EGLN1B,ATF4B,ERCC5,CEPT1B,PEX13,SFPQ,USP5,IPO11,ALDH5A1,MFAP3L,MACO1A,DDX23,IDE,MTMR6,PRELID3A,RETREG1,NPM1B,HMGB…
male	DEGs	GO:CC	nucleus	GO:0005634	5.64e-08	7.24868	4552	137	68	18345	U2AF2B,CRY3B,MED16,HSP70.3,HSF1,HSP90AA1.2,KDM5BB,CTNND2B,HSPA5,TRIM33,CRY3A,DDX17,UBAP2B,RXRBA,ARNT2,YLPM1,SRSF11,HSPA4A,CREB1B,ATF7B,DOT1L,CNOT7,HNRNPM,CTBP2A,PHF20A,RBM5,SRSF6B,SS18,TRA2A,PUF60A,PAPOLA,MTDHA,PBRM1L,HNRNPH1,EGLN1B,ATF4B,ERCC5,SFPQ,USP5,IPO11,MFAP3L,DDX23,MTMR6,NPM1B,HMGB1B,CIRBPB,HMGB1A,RCHY1,SESN3,NSUN2,HNRNPL2,HMGB3B,KHDRBS1A,HMGN2,SETB,LGALS3A,DBPB,HNRNPABB,CELF3B,KDM6BB,ZGC…
male	DEGs	GO:CC	intracellular organelle	GO:0043229	1.17e-07	6.93096	8502	137	99	18345	U2AF2B,SERPINH1B,CRY3B,MED16,HSP70.3,CEP162,HSF1,HSP90AA1.2,MYO1HA,EPB41L5,KDM5BB,CTNND2B,CLTCB,HSPA5,SI:DKEY-190G11.3,TSC1A,TRIM33,OGT.1,CRY3A,DDX17,UBAP2B,RXRBA,ARNT2,YLPM1,SRSF11,HSPA4A,CREB1B,ATF7B,DOT1L,CNOT7,P4HA1A,HNRNPM,CTBP2A,SNAP91A,PHF20A,RBM5,SRSF6B,SS18,TRA2A,MAPRE3A,PUF60A,PAPOLA,MTDHA,PBRM1L,HNRNPH1,EGLN1B,ATF4B,ERCC5,G3BP1,CEPT1B,PEX13,SFPQ,USP5,IPO11,ALDH5A1,MFAP3L,MACO1A,DDX23,I…
male	DEGs	GO:CC	intracellular anatomical structure	GO:0005622	1.44e-07	6.84304	10477	137	112	18345	U2AF2B,SERPINH1B,CRY3B,MED16,MARK3B,HSP70.3,CEP162,HSF1,HSP90AA1.2,MYO1HA,EPB41L5,EIF3C,KDM5BB,CTNND2B,CLTCB,HSPA5,SI:DKEY-190G11.3,TSC1A,TRIM33,OGT.1,CRY3A,DDX17,UBAP2B,RXRBA,ARNT2,YLPM1,SRSF11,HSPA4A,CREB1B,ATF7B,DOT1L,CNOT7,CRMP1,P4HA1A,HNRNPM,CTBP2A,SNAP91A,PHF20A,RBM5,SRSF6B,SS18,TRA2A,MAPRE3A,PUF60A,PAPOLA,MTDHA,FKBP4,PBRM1L,HNRNPH1,EGLN1B,ATF4B,ERCC5,G3BP1,CEPT1B,PEX13,SFPQ,USP5,GPD1L,IPO1…
male	DEGs	GO:CC	organelle	GO:0043226	1.6e-07	6.79628	8683	137	100	18345	U2AF2B,SERPINH1B,CRY3B,MED16,HSP70.3,CEP162,HSF1,HSP90AA1.2,MYO1HA,EPB41L5,KDM5BB,KCND2,CTNND2B,CLTCB,HSPA5,SI:DKEY-190G11.3,TSC1A,TRIM33,OGT.1,CRY3A,DDX17,UBAP2B,RXRBA,ARNT2,YLPM1,SRSF11,HSPA4A,CREB1B,ATF7B,DOT1L,CNOT7,P4HA1A,HNRNPM,CTBP2A,SNAP91A,PHF20A,RBM5,SRSF6B,SS18,TRA2A,MAPRE3A,PUF60A,PAPOLA,MTDHA,PBRM1L,HNRNPH1,EGLN1B,ATF4B,ERCC5,G3BP1,CEPT1B,PEX13,SFPQ,USP5,IPO11,ALDH5A1,MFAP3L,MACO1A,D…
male	DEGs	GO:CC	spliceosomal complex	GO:0005681	0.000249886	3.60226	106	137	8	18345	U2AF2B,HNRNPM,RBM5,TRA2A,DDX23,CIRBPB,LGALS3A,CIRBPA
male	DEGs	GO:CC	ribonucleoprotein complex	GO:1990904	0.000472112	3.32595	410	137	14	18345	U2AF2B,CELF1,DDX17,HNRNPM,RBM5,TRA2A,HNRNPH1,G3BP1,DDX23,NPM1B,CIRBPB,LGALS3A,CELF3B,CIRBPA
male	DEGs	GO:CC	cytoplasm	GO:0005737	0.0404907	1.39264	6483	137	69	18345	SERPINH1B,CRY3B,MARK3B,HSP70.3,CEP162,HSP90AA1.2,MYO1HA,EPB41L5,EIF3C,CTNND2B,CLTCB,HSPA5,SI:DKEY-190G11.3,TSC1A,OGT.1,CRY3A,DDX17,UBAP2B,ARNT2,HSPA4A,CRMP1,P4HA1A,HNRNPM,SNAP91A,MAPRE3A,FKBP4,EGLN1B,ATF4B,G3BP1,CEPT1B,PEX13,USP5,GPD1L,IPO11,ALDH5A1,GDI2,MFAP3L,MACO1A,IDE,MTMR6,PRELID3A,RETREG1,ZGC:65894,NPM1B,SI:DKEY-19E4.5,IGBP1,CIRBPB,PDP1,SCAMP2,ATCAYB,CLPXA,AP2M1A,ALDOAA,SESN3,NSUN2,CARS2,SH…
male	DEGs	GO:CC	intracellular organelle lumen	GO:0070013	0.0461821	1.33553	945	137	18	18345	U2AF2B,HSPA5,SRSF11,P4HA1A,PHF20A,SRSF6B,HNRNPH1,SFPQ,IDE,PRELID3A,NPM1B,CIRBPB,CLPXA,HNRNPABB,KDM6BB,PPHLN1,PDK2B,UBR4
male	DEGs	GO:CC	organelle lumen	GO:0043233	0.0461821	1.33553	945	137	18	18345	U2AF2B,HSPA5,SRSF11,P4HA1A,PHF20A,SRSF6B,HNRNPH1,SFPQ,IDE,PRELID3A,NPM1B,CIRBPB,CLPXA,HNRNPABB,KDM6BB,PPHLN1,PDK2B,UBR4
male	DEGs	GO:CC	membrane-enclosed lumen	GO:0031974	0.0461821	1.33553	945	137	18	18345	U2AF2B,HSPA5,SRSF11,P4HA1A,PHF20A,SRSF6B,HNRNPH1,SFPQ,IDE,PRELID3A,NPM1B,CIRBPB,CLPXA,HNRNPABB,KDM6BB,PPHLN1,PDK2B,UBR4
male	DEGs	KEGG	Spliceosome	KEGG:03040	0.000515807	3.28751	118	51	8	5317	U2AF2B,HSP70.3,HNRNPA1A,HNRNPM,SRSF6B,HNRNPA3,TRA2A,PUF60A
male	DEGs	KEGG	Protein processing in endoplasmic reticulum	KEGG:04141	0.00483567	2.31554	161	51	8	5317	HSP70.3,HSP90AA1.2,DNAJB1B,HSPA5,DNAJB1A,DNAJA1,UBXN4,SSR1
male	DEGs	REAC	Cellular response to heat stress	REAC:R-DRE-3371556	0.00553229	2.25709	82	76	7	7340	HSP70.3,HSPA5,HSPA4A,DNAJB1A,FKBP4,DNAJC7,HSPA13
male	DEGs	REAC	Metabolism of RNA	REAC:R-DRE-8953854	0.0139715	1.85476	509	76	16	7340	HSP70.3,HNRNPA1A,SRSF11,CNOT7,HNRNPM,RBM5,SRSF6B,EIF4A2,PUF60A,HNRNPH1,DDX23,PSMF1,CIRBPB,WDR12,SETB,CIRBPA
male	DEGs	REAC	Regulation of HSF1-mediated heat shock response	REAC:R-DRE-3371453	0.0144255	1.84087	65	76	6	7340	HSP70.3,HSPA5,HSPA4A,DNAJB1A,DNAJC7,HSPA13
male	DEGs	REAC	HSP90 chaperone cycle for steroid hormone receptors (SHR)	REAC:R-DRE-3371497	0.0319797	1.49513	47	76	5	7340	HSP70.3,DNAJB1A,FKBP4,DNAJA1,ZGC:65894
male	DEGs	REAC	Attenuation phase	REAC:R-DRE-3371568	0.0341337	1.46682	10	76	3	7340	HSP70.3,DNAJB1A,FKBP4
shared	DEGs	GO:MF	2-oxoglutarate-dependent dioxygenase activity	GO:0016706	6.7501e-06	5.17069	55	39	5	24485	KDM6BB,ASPH,EGLN1B,P4HA1A,KDM5BB
shared	DEGs	GO:MF	dioxygenase activity	GO:0051213	0.000125371	3.9018	98	39	5	24485	KDM6BB,ASPH,EGLN1B,P4HA1A,KDM5BB
shared	DEGs	GO:MF	unfolded protein binding	GO:0051082	0.00265423	2.57606	85	39	4	24485	DNAJB1A,HSPA5,HSP90AA1.2,HSP70.3
shared	DEGs	GO:MF	oxidoreductase activity, acting on paired donors, with incorporation or reduction of molecular oxygen	GO:0016705	0.0086534	2.06281	233	39	5	24485	KDM6BB,ASPH,EGLN1B,P4HA1A,KDM5BB
shared	DEGs	GO:MF	ATP hydrolysis activity	GO:0016887	0.0105727	1.97581	243	39	5	24485	HSPA13,HSPA4A,HSPA5,HSP90AA1.2,HSP70.3
shared	DEGs	GO:MF	ATP-dependent activity	GO:0140657	0.0117089	1.93148	611	39	7	24485	HSPA13,EIF4A2,HSPA4A,DDX17,HSPA5,HSP90AA1.2,HSP70.3
shared	DEGs	GO:BP	protein hydroxylation	GO:0018126	0.00750345	2.12474	24	37	3	21828	ASPH,EGLN1B,P4HA1A
shared	DEGs	GO:BP	response to temperature stimulus	GO:0009266	0.0479654	1.31907	44	37	3	21828	HSF1,CRY3A,HSP90AA1.2
shared	DEGs	GO:CC	intracellular membrane-bounded organelle	GO:0043231	2.2817e-05	4.64174	8112	35	29	20566	COPS2,SSR1,CIRBPA,PPHLN1,KDM6BB,HNRNPABB,SETB,HMGB3B,NSUN2,PRELID3A,IDE,EGLN1B,PBRM1L,SS18,SRSF6B,HSF1,SNAP91A,P4HA1A,HSPA4A,SRSF11,TSC1A,DDX17,CRY3A,HSPA5,CTNND2B,KDM5BB,HSP90AA1.2,HSP70.3,SERPINH1B
shared	DEGs	GO:CC	membrane-bounded organelle	GO:0043227	4.68348e-05	4.32943	8346	35	29	20566	COPS2,SSR1,CIRBPA,PPHLN1,KDM6BB,HNRNPABB,SETB,HMGB3B,NSUN2,PRELID3A,IDE,EGLN1B,PBRM1L,SS18,SRSF6B,HSF1,SNAP91A,P4HA1A,HSPA4A,SRSF11,TSC1A,DDX17,CRY3A,HSPA5,CTNND2B,KDM5BB,HSP90AA1.2,HSP70.3,SERPINH1B
shared	DEGs	GO:CC	intracellular organelle	GO:0043229	0.000481338	3.31755	10573	35	31	20566	COPS2,SSR1,CIRBPA,PPHLN1,KDM6BB,HNRNPABB,SETB,HMGB3B,NSUN2,PRELID3A,IDE,EGLN1B,PBRM1L,MAPRE3A,SS18,SRSF6B,HSF1,SNAP91A,P4HA1A,HSPA4A,SRSF11,TSC1A,DDX17,CRY3A,HSPA5,CTNND2B,KDM5BB,EPB41L5,HSP90AA1.2,HSP70.3,SERPINH1B
shared	DEGs	GO:CC	nucleus	GO:0005634	0.00060587	3.21762	5331	35	22	20566	COPS2,CIRBPA,PPHLN1,KDM6BB,HNRNPABB,SETB,HMGB3B,NSUN2,EGLN1B,PBRM1L,SS18,SRSF6B,HSF1,HSPA4A,SRSF11,DDX17,CRY3A,HSPA5,CTNND2B,KDM5BB,HSP90AA1.2,HSP70.3
shared	DEGs	GO:CC	organelle	GO:0043226	0.000814833	3.08893	10781	35	31	20566	COPS2,SSR1,CIRBPA,PPHLN1,KDM6BB,HNRNPABB,SETB,HMGB3B,NSUN2,PRELID3A,IDE,EGLN1B,PBRM1L,MAPRE3A,SS18,SRSF6B,HSF1,SNAP91A,P4HA1A,HSPA4A,SRSF11,TSC1A,DDX17,CRY3A,HSPA5,CTNND2B,KDM5BB,EPB41L5,HSP90AA1.2,HSP70.3,SERPINH1B
shared	DEGs	GO:CC	intracellular anatomical structure	GO:0005622	0.00149983	2.82396	12687	35	33	20566	COPS2,SSR1,CIRBPA,PPHLN1,KDM6BB,EIF3C,HNRNPABB,SETB,HMGB3B,NSUN2,PRELID3A,IDE,GDI2,EGLN1B,PBRM1L,MAPRE3A,SS18,SRSF6B,HSF1,SNAP91A,P4HA1A,HSPA4A,SRSF11,TSC1A,DDX17,CRY3A,HSPA5,CTNND2B,KDM5BB,EPB41L5,HSP90AA1.2,HSP70.3,SERPINH1B
shared	DEGs	GO:CC	organelle lumen	GO:0043233	0.0168023	1.77463	1190	35	9	20566	PPHLN1,KDM6BB,HNRNPABB,PRELID3A,IDE,SRSF6B,P4HA1A,SRSF11,HSPA5
shared	DEGs	GO:CC	intracellular organelle lumen	GO:0070013	0.0168023	1.77463	1190	35	9	20566	PPHLN1,KDM6BB,HNRNPABB,PRELID3A,IDE,SRSF6B,P4HA1A,SRSF11,HSPA5
shared	DEGs	GO:CC	membrane-enclosed lumen	GO:0031974	0.0168023	1.77463	1190	35	9	20566	PPHLN1,KDM6BB,HNRNPABB,PRELID3A,IDE,SRSF6B,P4HA1A,SRSF11,HSPA5
shared	DEGs	KEGG	Protein processing in endoplasmic reticulum	KEGG:04141	0.000435961	3.36055	161	12	5	5305	SSR1,DNAJB1A,HSPA5,HSP90AA1.2,HSP70.3
shared	DEGs	REAC	Regulation of HSF1-mediated heat shock response	REAC:R-DRE-3371453	8.07996e-05	4.09259	65	18	5	7340	HSPA13,DNAJB1A,HSPA4A,HSPA5,HSP70.3
shared	DEGs	REAC	Cellular response to heat stress	REAC:R-DRE-3371556	0.000260254	3.5846	82	18	5	7340	HSPA13,DNAJB1A,HSPA4A,HSPA5,HSP70.3

## Sheet: Shared DEG Info
Info Source	Gene	Name	Description
ZFIN	cops2	COP9 signalosome subunit 2	Is predicted to contribute to NEDD8-specific protease activity. Predicted to be involved in negative regulation of nucleic acid-templated transcription and protein deneddylation. Predicted to localize to COP9 signalosome. Orthologous to human COPS2 (COP9 signalosome subunit 2).
NCBI	LOC120474467	poly [ADP-ribose] polymerase tankyrase-2-like	NA
ZFIN	ssr1	signal sequence receptor, alpha	Involved in cellular response to estrogen stimulus. Predicted to localize to endoplasmic reticulum. Is expressed in several structures, including axis; fin; hatching gland; periderm; and polster. Orthologous to human SSR1 (signal sequence receptor subunit 1).
ZFIN	cirbpa	cold inducible RNA binding protein a	Predicted to enable RNA binding activity. Predicted to be involved in positive regulation of mRNA splicing, via spliceosome. Predicted to be part of spliceosomal complex. Is expressed in digestive system; nervous system; and pectoral fin. Orthologous to several human genes including CIRBP (cold inducible RNA binding protein).
ZFIN	jarid2a	jumonji, AT rich interactive domain 2a	Predicted to enable histone demethylase activity. Predicted to be involved in chromatin remodeling. Predicted to be active in nucleus. Human ortholog(s) of this gene implicated in autistic disorder. Orthologous to human JARID2 (jumonji and AT-rich interaction domain containing 2).
NCBI	LOC120484552	protein Jumonji-like	NA
ZFIN	pphln1	periphilin 1	Predicted to be involved in negative regulation of gene expression, epigenetic and protein localization to heterochromatin. Predicted to act upstream of or within negative regulation of transcription, DNA-templated. Predicted to be active in nucleoplasm. Orthologous to human PPHLN1 (periphilin 1).
ZFIN	kdm6bb	lysine (K)-specific demethylase 6B, b	Enables H3K27me3 modified histone binding activity and histone demethylase activity (H3-K27 specific). Acts upstream of or within several processes, including common myeloid progenitor cell proliferation; fin regeneration; and primitive erythrocyte differentiation. Predicted to be located in nucleus. Predicted to be part of MLL3/4 complex. Is expressed in brain; caudal hematopoietic tissue; heart…
ZFIN	eif3c	eukaryotic translation initiation factor 3, subunit C	Predicted to enable translation initiation factor binding activity. Predicted to contribute to translation initiation factor activity. Predicted to be involved in translational initiation. Predicted to act upstream of or within translation. Predicted to be located in cytoplasm. Predicted to be part of eukaryotic translation initiation factor 3 complex. Orthologous to several human genes including…
ZFIN	rybpa	RING1 and YY1 binding protein a	Predicted to enable DNA binding activity and transcription coregulator activity. Predicted to be involved in regulation of transcription, DNA-templated. Predicted to act upstream of or within apoptotic process and positive regulation of transcription, DNA-templated. Predicted to be located in cytoplasm. Predicted to be active in nucleus. Is expressed in basal plate midbrain region; central nervou…
ZFIN	hnrnpabb	heterogeneous nuclear ribonucleoprotein A/Bb	Predicted to enable RNA binding activity. Predicted to be involved in regulation of gene expression. Predicted to be located in cytoplasm and nucleus. Predicted to be active in nucleoplasm. Human ortholog(s) of this gene implicated in hepatocellular carcinoma. Orthologous to human HNRNPAB (heterogeneous nuclear ribonucleoprotein A/B).
ZFIN	setb	SET nuclear proto-oncogene b	Predicted to enable chromatin binding activity and histone binding activity. Acts upstream of or within neuromast development. Predicted to be active in chromatin and nucleus. Is expressed in several structures, including digestive system; nervous system; optic cup; otic vesicle; and tail bud. Human ortholog(s) of this gene implicated in autosomal dominant non-syndromic intellectual disability. O…
ZFIN	hmgb3a	high mobility group box 3a	Predicted to enable DNA binding activity, bending. Predicted to be involved in regulation of transcription by RNA polymerase II. Predicted to be located in nucleus. Is expressed in several structures, including axis; intermediate cell mass of mesoderm; mesoderm; nervous system; and pectoral fin bud. Human ortholog(s) of this gene implicated in syndromic microphthalmia 13. Orthologous to human HMG…
ZFIN	kiaa1143	zgc:77056	Orthologous to human KIAA1143 (KIAA1143).
ZFIN	plekhm2	pleckstrin homology domain containing, family M (with RUN domain) member 2	Predicted to enable kinesin binding activity. Predicted to be involved in several processes, including Golgi organization; lysosome localization; and positive regulation of membrane tubulation. Predicted to be active in endosome membrane. Orthologous to human PLEKHM2 (pleckstrin homology and RUN domain containing M2).
ZFIN	hmgb3b	high mobility group box 3b	Predicted to enable DNA binding activity, bending. Predicted to be involved in regulation of transcription by RNA polymerase II. Predicted to be located in chromosome and nucleus. Is expressed in central nervous system; intermediate cell mass of mesoderm; ovary; and pectoral fin bud. Human ortholog(s) of this gene implicated in syndromic microphthalmia 13. Orthologous to human HMGB3 (high mobilit…
ZFIN	nob1	NIN1 (RPN12) binding protein 1 homolog	Predicted to enable endoribonuclease activity. Predicted to be involved in maturation of SSU-rRNA. Predicted to act upstream of or within cleavage involved in rRNA processing and ribosomal small subunit biogenesis. Predicted to be located in nucleus. Predicted to be part of preribosome, small subunit precursor. Orthologous to human NOB1 (NIN1 (RPN12) binding protein 1 homolog).
ZFIN	nsun2	NOP2/Sun RNA methyltransferase 2	Predicted to enable tRNA (cytosine-5-)-methyltransferase activity and tRNA binding activity. Predicted to be involved in tRNA methylation. Predicted to act upstream of or within methylation and tRNA processing. Predicted to be located in extracellular region. Predicted to be active in cytoplasm and nucleus. Human ortholog(s) of this gene implicated in autosomal recessive non-syndromic intellectua…
ZFIN	f3a	coagulation factor IIIa	Predicted to enable cytokine receptor activity. Predicted to be involved in cytokine-mediated signaling pathway. Predicted to act upstream of or within blood coagulation. Predicted to be located in membrane. Predicted to be active in plasma membrane. Predicted to be integral component of membrane. Human ortholog(s) of this gene implicated in B-lymphoblastic leukemia/lymphoma; COVID-19; disseminat…
ZFIN	lancl1	LanC antibiotic synthetase component C-like 1 (bacterial)	Predicted to enable glutathione binding activity; glutathione transferase activity; and zinc ion binding activity. Predicted to act upstream of or within carbohydrate metabolic process. Predicted to be located in cytoplasm and membrane. Predicted to be active in plasma membrane. Orthologous to human LANCL1 (LanC like 1).
ZFIN	hspa13	heat shock protein 70 family, member 13	Predicted to enable several functions, including ATP binding activity; ATP hydrolysis activity; and misfolded protein binding activity. Predicted to be involved in cellular response to unfolded protein; chaperone cofactor-dependent protein refolding; and protein refolding. Predicted to be located in endoplasmic reticulum. Predicted to be active in mitochondrion. Is expressed in liver and post-ven…
ZFIN	zc2hc1a	zinc finger, C2HC-type containing 1A	Predicted to enable metal ion binding activity. Orthologous to human ZC2HC1A (zinc finger C2HC-type containing 1A).
ZFIN	asph	aspartate beta-hydroxylase	Predicted to enable peptidyl-aspartic acid 3-dioxygenase activity. Predicted to be involved in peptidyl-aspartic acid hydroxylation. Predicted to be located in membrane. Predicted to be integral component of membrane. Predicted to be active in endoplasmic reticulum. Is expressed in several structures, including choroidal fissure; epidermis; hatching gland; pectoral fin; and periderm.
ZFIN	prelid3a	PRELI domain containing 3A	Predicted to enable phosphatidic acid transfer activity. Predicted to be involved in phospholipid transport. Predicted to be active in mitochondrial intermembrane space. Orthologous to human PRELID3A (PRELI domain containing 3A).
ZFIN	ide	insulin-degrading enzyme	Predicted to enable metal ion binding activity and metallopeptidase activity. Acts upstream of or within pancreas regeneration and type B pancreatic cell development. Predicted to be active in mitochondrion and peroxisomal matrix. Is expressed in myotome. Human ortholog(s) of this gene implicated in Alzheimer's disease and type 2 diabetes mellitus. Orthologous to human IDE (insulin degrading enzy…
ZFIN	gdi2	GDP dissociation inhibitor 2	Predicted to enable Rab GDP-dissociation inhibitor activity. Predicted to be involved in vesicle-mediated transport. Predicted to act upstream of or within protein transport and small GTPase mediated signal transduction. Predicted to be active in cytoplasm. Orthologous to human GDI2 (GDP dissociation inhibitor 2).
ZFIN	egln1b	egl-9 family hypoxia-inducible factor 1b	Predicted to enable ferrous iron binding activity and peptidyl-proline 4-dioxygenase activity. Predicted to be involved in cellular response to hypoxia and peptidyl-proline hydroxylation to 4-hydroxy-L-proline. Predicted to be active in cytoplasm and nucleus. Human ortholog(s) of this gene implicated in familial erythrocytosis 3; polycythemia; and renal cell carcinoma. Orthologous to human EGLN1 …
ZFIN	pbrm1l	polybromo 1, like	Predicted to enable chromatin binding activity. Predicted to be involved in ATP-dependent chromatin remodeling. Predicted to act upstream of or within chromatin remodeling. Predicted to be located in nucleus. Predicted to be part of RSC-type complex.
ZFIN	eif4a2	eukaryotic translation initiation factor 4A, isoform 2	Predicted to enable translation initiation factor activity. Predicted to be involved in cytoplasmic translational initiation. Predicted to act upstream of or within translational initiation. Is expressed in several structures, including alar plate midbrain region; head; immature eye; midbrain; and segmental plate. Orthologous to human EIF4A2 (eukaryotic translation initiation factor 4A2).
ZFIN	chd4a	chromodomain helicase DNA binding protein 4a	Predicted to enable several functions, including ATP binding activity; DNA helicase activity; and metal ion binding activity. Acts upstream of or within fin regeneration. Is expressed in blastomere and central nervous system. Orthologous to human CHD4 (chromodomain helicase DNA binding protein 4).
ZFIN	mapre3a	microtubule-associated protein, RP/EB family, member 3a	Predicted to enable microtubule plus-end binding activity. Predicted to be involved in protein localization to microtubule plus-end; regulation of microtubule polymerization or depolymerization; and spindle assembly. Predicted to act upstream of or within cell division. Predicted to be located in cytoplasm and microtubule. Predicted to be active in microtubule cytoskeleton. Orthologous to human M…
ZFIN	ss18	SS18 subunit of BAF chromatin remodeling complex	Predicted to enable transcription coactivator activity. Predicted to be involved in positive regulation of transcription by RNA polymerase II. Predicted to be active in nucleus. Human ortholog(s) of this gene implicated in synovial sarcoma. Orthologous to human SS18 (SS18 subunit of BAF chromatin remodeling complex).
ZFIN	hnrnpa3	heterogeneous nuclear ribonucleoprotein A3	Predicted to enable RNA binding activity. Predicted to be located in viral nucleocapsid. Orthologous to human HNRNPA3 (heterogeneous nuclear ribonucleoprotein A3).
ZFIN	srsf6b	serine and arginine rich splicing factor 6b	Predicted to enable mRNA binding activity. Predicted to be involved in alternative mRNA splicing, via spliceosome and mRNA splice site selection. Predicted to be active in nuclear speck. Human ortholog(s) of this gene implicated in proliferative diabetic retinopathy and spermatogenic failure 3. Orthologous to human SRSF6 (serine and arginine rich splicing factor 6).
ZFIN	hsf1	heat shock transcription factor 1	Enables sequence-specific DNA binding activity. Acts upstream of or within lens development in camera-type eye and response to heat. Predicted to be active in nucleus. Is expressed in brain; head; and otic vesicle. Human ortholog(s) of this gene implicated in Huntington's disease. Orthologous to human HSF1 (heat shock transcription factor 1).
ZFIN	snap91a	synaptosome associated protein 91a	Predicted to enable SNARE binding activity; clathrin heavy chain binding activity; and phosphatidylinositol binding activity. Predicted to be involved in clathrin-dependent endocytosis and synaptic vesicle budding from presynaptic endocytic zone membrane. Predicted to act upstream of or within clathrin coat assembly. Predicted to be active in clathrin-coated pit; clathrin-coated vesicle; and syna…
ZFIN	dnajb1a	DnaJ heat shock protein family (Hsp40) member B1a	Predicted to enable several functions, including Hsp70 protein binding activity; chaperone binding activity; and unfolded protein binding activity. Acts upstream of or within lens development in camera-type eye. Predicted to be active in cytosol. Orthologous to human DNAJB1 (DnaJ heat shock protein family (Hsp40) member B1).
ZFIN	p4ha1a	prolyl 4-hydroxylase, alpha polypeptide I a	Predicted to enable procollagen-proline 4-dioxygenase activity. Predicted to be involved in peptidyl-proline hydroxylation to 4-hydroxy-L-proline. Predicted to be located in endoplasmic reticulum lumen. Predicted to be active in endoplasmic reticulum. Orthologous to human P4HA1 (prolyl 4-hydroxylase subunit alpha 1).
ZFIN	srrt	serrate RNA effector molecule homolog (Arabidopsis)	Predicted to be involved in primary miRNA processing. Predicted to act upstream of or within gene silencing by RNA and mRNA processing. Predicted to be located in cytoplasm and nucleoplasm. Predicted to be active in nuclear body. Orthologous to human SRRT (serrate, RNA effector molecule).
ZFIN	hspa4a	heat shock protein 4a	Predicted to enable ATP binding activity. Predicted to be active in cytosol and nucleus. Is expressed in several structures, including gut; head; liver; pectoral fin bud; and somite. Human ortholog(s) of this gene implicated in Chagas disease. Orthologous to human HSPA4 (heat shock protein family A (Hsp70) member 4).
ZFIN	srsf11	serine and arginine rich splicing factor 11	Predicted to enable RNA binding activity. Predicted to act upstream of or within RNA splicing. Predicted to be located in membrane. Predicted to be integral component of membrane. Predicted to be active in nucleoplasm. Orthologous to human SRSF11 (serine and arginine rich splicing factor 11).
ZFIN	tsc1a	TSC complex subunit 1a	Acts upstream of or within several processes, including cilium assembly; pronephros development; and regulation of TOR signaling. Located in Golgi apparatus. Is expressed in notochord; polster; pronephric duct; and somite. Human ortholog(s) of this gene implicated in intellectual disability; lymphangioleiomyomatosis; tuberous sclerosis; and tuberous sclerosis 1. Orthologous to human TSC1 (TSC com…
ZFIN	ddx17	DEAD-box helicase 17	Predicted to enable RNA binding activity and RNA helicase activity. Predicted to be involved in alternative mRNA splicing, via spliceosome. Predicted to be part of ribonucleoprotein complex. Predicted to be active in cytoplasm and nucleus. Orthologous to human DDX17 (DEAD-box helicase 17).
ZFIN	cry3a	cryptochrome circadian regulator 3a	Predicted to enable DNA binding activity and FAD binding activity. Acts upstream of or within negative regulation of transcription, DNA-templated; response to light stimulus; and response to temperature stimulus. Predicted to be active in cytoplasm and nucleus. Is expressed in several structures, including brain; eye; heart; liver; and pleuroperitoneal region. Human ortholog(s) of this gene impli…
ZFIN	fbrsl1	fibrosin-like 1	Is expressed in several structures, including Kupffer's vesicle; anterior neural rod; brain; midbrain neural keel; and presumptive diencephalon. Orthologous to human FBRSL1 (fibrosin like 1).
NCBI	LOC120488195	KH-type splicing regulatory protein	NA
ZFIN	hspa5	heat shock protein 5	Predicted to enable several functions, including ATP binding activity; ATP hydrolysis activity; and misfolded protein binding activity. Acts upstream of or within response to hypoxia and response to yeast. Located in extracellular region. Is expressed in several structures, including central nervous system; digestive system; immature eye; prechordal plate; and sensory system. Human ortholog(s) of…
ZFIN	ctnnd2b	catenin (cadherin-associated protein), delta 2b	Predicted to enable cadherin binding activity. Acts upstream of or within neuron migration. Predicted to be located in cell junction. Predicted to be active in several cellular components, including adherens junction; nucleus; and postsynaptic density. Human ortholog(s) of this gene implicated in anxiety disorder; major depressive disorder; and schizophrenia. Orthologous to human CTNND2 (catenin …
NCBI	LOC120491996	heat shock protein HSP 90-alpha 1	NA
ZFIN	kdm5bb	lysine (K)-specific demethylase 5Bb	Predicted to enable histone demethylase activity (H3-dimethyl-K4 specific) and histone demethylase activity (H3-trimethyl-K4 specific). Predicted to be involved in chromatin remodeling and histone H3-K4 demethylation. Predicted to act upstream of or within chromatin organization. Predicted to be active in nucleus. Is expressed in several structures, including hindbrain neural plate; musculature s…
ZFIN	eif3c	eukaryotic translation initiation factor 3, subunit C	Predicted to enable translation initiation factor binding activity. Predicted to contribute to translation initiation factor activity. Predicted to be involved in translational initiation. Predicted to act upstream of or within translation. Predicted to be located in cytoplasm. Predicted to be part of eukaryotic translation initiation factor 3 complex. Orthologous to several human genes including…
ZFIN	epb41l5	erythrocyte membrane protein band 4.1 like 5	Predicted to enable cytoskeletal protein binding activity. Acts upstream of or within several processes, including animal organ development; maintenance of epithelial cell apical/basal polarity; and positive regulation of Notch signaling pathway. Located in bicellular tight junction. Part of protein-containing complex. Is expressed in integument; nervous system; and pronephros. Used to study prot…
ZFIN	hsp90aa1.2	heat shock protein 90, alpha (cytosolic), class A member 1, tandem duplicate 2	Predicted to enable ATP binding activity; disordered domain specific binding activity; and unfolded protein binding activity. Predicted to be involved in several processes, including cellular response to heat; protein stabilization; and response to cold. Predicted to be located in cytoplasm. Predicted to be part of protein-containing complex. Predicted to be active in several cellular components,…
NCBI	LOC120486364	calcium homeostasis endoplasmic reticulum protein	NA
ZFIN	hsp70.3	heat shock cognate 70-kd protein, tandem duplicate 3	Predicted to enable several functions, including ATP binding activity; ATP hydrolysis activity; and misfolded protein binding activity. Acts upstream of or within camera-type eye morphogenesis. Predicted to be active in cytosol; nucleus; and plasma membrane. Human ortholog(s) of this gene implicated in several diseases, including Kawasaki disease; autoimmune disease of musculoskeletal system (mul…
ZFIN	rsrp1	arginine/serine-rich protein 1	Orthologous to human RSRP1 (arginine and serine rich protein 1).
NCBI	LOC120490127
ZFIN	zc2hc1a	zinc finger, C2HC-type containing 1A	Predicted to enable metal ion binding activity. Orthologous to human ZC2HC1A (zinc finger C2HC-type containing 1A).
ZFIN	dnaja	DnaJ heat shock protein family (Hsp40) member A	Is expressed in several structures, including cardiovascular system; musculature system; segmental plate; sensory system; and solid lens vesicle.
ZFIN	serpinh1b	serpin peptidase inhibitor, clade H (heat shock protein 47), member 1b	Predicted to enable serine-type endopeptidase inhibitor activity. Acts upstream of or within fin regeneration. Predicted to be located in extracellular space. Predicted to be active in endoplasmic reticulum. Is expressed in several structures, including ectoderm; fin; germ ring; mesenchyme derived from head mesoderm; and mesoderm. Human ortholog(s) of this gene implicated in osteogenesis imperfec…
ZFIN	znf384a	zinc finger protein 384 a	Predicted to enable DNA-binding transcription factor activity, RNA polymerase II-specific and RNA polymerase II cis-regulatory region sequence-specific DNA binding activity. Predicted to be involved in regulation of transcription, DNA-templated. Orthologous to human ZNF384 (zinc finger protein 384).

## Sheet: Shared DEG log2foldchanges
Female				Male
Gene.ID	Gene.Symbol.x	log2.Fold.Change.Female	Adjdusted.P.value.Female	Gene.Symbol.y	log2.Fold.Change.Male	Adjusted.P.value.Male
XP_039551082.1_33279	cops2	1.11354	0.0160886	cops2	1.12039	0.000511263
XP_039520685.1_5805	LOC120474467	0.757451	0.00919588	LOC120474467	1.07675	1.07e-05
XP_039512346.1_41474	ssr1	1.21943	0.022654	ssr1	0.939801	0.00647428
XP_039517076.1_45999	cirbpa	0.752405	0.00082476	cirbpa	0.845086	5.58e-05
XP_039535553.1_18853	jarid2a	0.957495	6.49e-05	jarid2a	0.828329	0.00801309
XP_039535722.1_18898	LOC120484552	0.867463	1.33e-05	LOC120484552	0.798854	0.00665698
XP_039524049.1_8766	pphln1	0.638768	0.00132093	pphln1	0.658851	0.0013149
XP_039531572.1_17523	kdm6bb	0.778166	0.00082476	kdm6bb	0.605002	0.0160985
XP_039531573.1_17524	kdm6bb	0.778166	0.00082476	kdm6bb	0.605002	0.0160985
XP_039531574.1_17525	kdm6bb	0.778166	0.00082476	kdm6bb	0.605002	0.0160985
XP_039531575.1_17526	kdm6bb	0.778166	0.00082476	kdm6bb	0.605002	0.0160985
XP_039513617.1_42839	eif3c	0.59679	0.000439215	eif3c	0.57151	0.000620495
XP_039508812.1_38706	rybpa	0.536086	8.06e-06	rybpa	0.547293	1.07e-05
XP_039516967.1_45886	hnrnpabb	0.482812	0.0178262	hnrnpabb	0.544928	0.00845142
XP_039524798.1_9475	setb	0.520961	0.00132093	setb	0.499943	0.0160424
XP_039515996.1_4614	hmgb3a	0.55675	3.03e-06	hmgb3a	0.494551	0.000492968
XP_039506785.1_36619	kiaa1143	0.373001	0.000439215	kiaa1143	0.448502	0.000152805
XP_039508542.1_38346	plekhm2	0.497697	0.00378656	plekhm2	0.425785	0.0146044
XP_039531881.1_16242	hmgb3b	0.334909	0.00371727	hmgb3b	0.422866	0.00013056
XP_039510371.1_39834	nob1	0.297245	0.020796	nob1	0.368159	9.12e-05
XP_039536891.1_20310	nsun2	0.327275	0.0363897	nsun2	0.359349	0.00620397
XP_039540912.1_23848	f3a	0.325905	0.0133563	f3a	0.349827	0.00224671
XP_039504294.1_34476	lancl1	0.294545	0.00082476	lancl1	0.345505	1.37e-07
XP_039518683.1_5001	hspa13	0.236449	0.00474157	hspa13	0.315808	2.76e-07
XP_039522990.1_7900	zc2hc1a	0.350854	1.86e-05	zc2hc1a	0.277173	0.0218646
XP_039533467.1_16180	asph	0.187253	0.0388004	asph	0.232787	0.00372223
XP_039535896.1_18876	prelid3a	0.302573	0.0430513	prelid3a	0.223051	0.0386262
XP_039527691.1_12142	ide	0.194166	0.00418135	ide	0.207412	0.00156138
XP_039527693.1_12143	ide	0.194166	0.00418135	ide	0.207412	0.00156138
XP_039523958.1_8670	gdi2	0.126444	0.00647934	gdi2	0.166904	0.01429
XP_039529603.1_13895	egln1b	-0.312478	0.0259297	egln1b	-0.347168	0.00304071
XP_039503229.1_33393	pbrm1l	-0.364309	0.0430513	pbrm1l	-0.353253	0.0113639
XP_039517203.1_46096	eif4a2	-0.50972	0.00034217	eif4a2	-0.414739	0.0335889
XP_039537407.1_20735	chd4a	-0.283079	0.0133563	chd4a	-0.421072	2.17e-09
XP_039523702.1_849	mapre3a	-0.24592	0.0327088	mapre3a	-0.424867	0.000308072
XP_039505729.1_35694	ss18	-0.593423	1.14e-05	ss18	-0.433336	0.0106717
XP_039503241.1_33361	hnrnpa3	-0.463126	0.00301064	hnrnpa3	-0.435369	0.00286035
XP_039519181.1_47922	srsf6b	-0.459024	0.0104178	srsf6b	-0.43939	0.000921394
XP_039534368.1_18089	hsf1	-0.38634	0.00687193	hsf1	-0.455358	0.000335396
XP_039535448.1_19515	snap91a	-0.392719	0.0317902	snap91a	-0.496446	0.00182912
XP_039541583.1_24636	dnajb1a	-0.49532	0.0305058	dnajb1a	-0.523102	0.000353231
XP_039511524.1_41421	p4ha1a	-0.549411	0.00546573	p4ha1a	-0.554132	0.0199065
XP_039517471.1_46330	srrt	-0.467344	0.0353464	srrt	-0.585233	0.000197448
XP_039519489.1_48281	hspa4a	-0.531421	0.000605173	hspa4a	-0.61899	0.000293731
XP_039545908.1_28375	srsf11	-0.722008	0.000228216	srsf11	-0.623078	0.00224671
XP_039514706.1_44164	tsc1a	-0.521094	0.00519396	tsc1a	-0.631293	1.84e-07
XP_039511577.1_41347	ddx17	-0.516191	0.0410085	ddx17	-0.660668	0.000133669
XP_039511579.1_41348	ddx17	-0.516191	0.0410085	ddx17	-0.660668	0.000133669
XP_039533932.1_1905	cry3a	-0.611731	0.0370943	cry3a	-0.674978	0.0472905
XP_039515925.1_43520	fbrsl1	-0.779188	0.0135688	fbrsl1	-0.704814	0.0146044
XP_039540713.1_2649	LOC120488195	-0.835802	0.00676753	LOC120488195	-0.750957	0.000511263
XP_039517478.1_46429	hspa5	-0.642073	0.0192699	hspa5	-0.754355	0.00136925
XP_039533254.1_16080	ctnnd2b	-0.950996	0.0177314	ctnnd2b	-0.812984	0.00156313
XP_039545989.1_28490	LOC120491996	-2.29845	0.00082476	LOC120491996	-0.832073	0.011405
XP_039535159.1_2039	kdm5bb	-0.878788	0.0368556	kdm5bb	-0.865993	0.0345528
XP_039513618.1_42838	eif3c	-1.01596	1.3e-10	eif3c	-0.877861	6.69e-05
XP_039538875.1_21560	epb41l5	-0.846164	0.00484848	epb41l5	-0.882923	0.0040799
XP_039545988.1_28492	hsp90aa1.2	-0.963416	9.53e-06	hsp90aa1.2	-0.968908	5.61e-05
XP_039538295.1_21843	LOC120486364	-0.920308	0.0396975	LOC120486364	-1.0357	0.00013056
XP_039543452.1_25198	hsp70.3	-0.900307	0.00311788	hsp70.3	-1.07898	0.00665698
XP_039527786.1_12260	rsrp1	-1.03688	0.00576255	rsrp1	-1.17167	9.72e-05
XP_039543451.1_25197	LOC120490127	-1.06541	0.00374615	LOC120490127	-1.39916	0.0248916
XP_039522992.1_7899	zc2hc1a	-1.00656	0.0410085	zc2hc1a	-1.44051	0.00226685
XP_039504150.1_33966	dnaja	-1.19181	0.000439215	dnaja	-1.50556	1.07e-05
XP_039518620.1_4993	serpinh1b	-1.3131	0.00100594	serpinh1b	-1.52361	1.07e-05
XP_039534759.1_18170	znf384a	-1.59965	0.00813015	znf384a	-1.87592	0.0349685

## Sheet: Top 14 Pharmaceuticals
Date	Time		Location	Venlafaxine	Desvenlafaxine	Metformin	Guanylurea	Citalopram	Bupropion	Fexofenadine	Carbamazepine	Sulfamethoxazole	Tramadol	Lidocaine	Methocarbamol	Fluconazole	Atenolol	Sum	1H-BT	5methylBT
2019-07-14	10am	0hr	US	14.1426	2.18317	7.55239	0.348293	4.13453	4.75357	30.8483	2.50513	0.0438401	0.649449	0.639945	0.0540654	1.19349	0	69.0488	18.4815	8.1447
	10am	0	OF	1137.45	379.634	615.279	58.7508	500.72	475.689	13.5723	419.127	162.169	80.4403	263.252	102.708	185.579	0	4394.38	72.9203	56.2029
	10am	0	DS	1093.8	298.412	1257.62	27.535	364.328	1302.25	1.55411	369.411	195.737	48.8072	408.634	80.8651	174.791	0	5623.74	78.521	48.0579
	10am	0	Gage	411.409	282.389	188.964	11.5081	31.0557	147.718	282.038	197.964	144.297	78.7385	128.965	34.0192	81.1048	0	2020.17	71.4046	35.7948
2019-07-14	7pm	9hr	US	3.81173	0.438729	3.68451	0.0317069	0.244904	0.554666	4.85677	0.290929	0.0428435	0.098399	0.00135115	0.0592841	0.0466935	0	14.1625	18.8658	9.57493
	7pm	9	OF	1251.03	594.365	402.899	118.707	542.779	491.67	32.1708	459.308	249.458	142.848	276.863	88.1977	231.759	0	4882.05	77.6866	51.2089
	7pm	9	DS	1063.17	382.037	363.232	37.3035	378.579	441.127	33.645	389.56	133.33	82.6341	225.124	79.4132	195.099	0	3804.25	71.266	43.456
	7pm	9	Gage	450.534	170.414	244.237	8.06921	39.7221	148.114	0.21487	222.933	57.1551	26.233	107.056	44.3467	99.0256	0	1618.06	59.6753	27.3103
2019-07-15	8am	22hr	US	3.10054	0.174305	3.33915	0.00814561	0.105503	0.331378	2.79772	0.0289021	0.00246975	0.0672325	0.0336172	0.0129279	0.581634	0	10.5835	17.6182	7.97989
	8am	22	OF	1145.23	276.316	480.242	52.9604	384.33	507.046	7.56224	421.248	50.2109	45.8438	225.315	169.149	188.584	0	3954.03	67.3285	39.9524
	8am	22	DS	971.637	385.059	408.302	56.5217	272.325	397.102	6.36621	363.465	127.731	67.1194	207.147	145.584	158.855	0	3567.21	62.4499	37.9708
	8am	22	Gage	437.24	241.906	263.29	8.30117	1.9278	208.012	18.701	216.902	167.34	47.7178	137.742	41.9744	108.506	0	1899.56	49.027	24.9798
2019-07-15	12pm	26hr	US	2.66053	0.174851	3.63396	0.136705	0.302338	0.00830264	2.92409	0.263326	0.0244396	0.0469059	0.0300162	0.020335	0.0370568	0	10.2629	17.8395	7.99069
	12pm	26	OF	1216.93	215.331	917.504	45.0524	264.454	725.751	6.02099	436.187	175.561	30.5822	250.073	137.877	195.325	0	4616.65	69.7929	45.367
	12pm	26	DS	1040.5	391.289	780.767	9.13662	204.709	585.128	155.476	359.729	113.163	105.58	255.773	114.329	160.871	0	4276.45	61.8596	35.6491
	12pm	26	Gage	410.145	187.755	217.211	42.1875	30.26	203.407	16.4692	181.136	58.4236	38.2163	108.347	41.3315	83.1076	0	1618	47.9307	18.995
2019-07-15	7pm	33hr	US	12.3041	1.5135	5.41586	30.0403	3.68209	2.63005	19.4434	2.37853	0.0271468	0.5089	0.454865	0.0553674	1.36391	0	79.8181	22.3358	6.42995
	7pm	33	OF	1211.72	378.206	357.894	1085.48	464.689	501.468	2315.97	418.099	28.2735	159.146	225.07	65.2993	179.127	40.8403	7431.29	229.956	108.848
	7pm	33	DS	989.895	313.948	276.391	1937.17	327.02	399.195	1991.85	338.055	56.8488	167.88	176.186	55.5294	148.346	27.6899	7206.01	189.229	93.4763
	7pm	33	Gage	501.005	227.123	299.992	496.357	44.2819	176.788	1309.13	227.537	20.5982	85.7746	118.614	58.1894	104.087	20.49	3689.97	49.8534	14.0276
2019-07-16	8am	46hr	US	15.8868	2.51349	5.83723	20.0679	6.45505	3.82766	48.0444	3.41818	0.0664387	0.823022	0.828819	0.0158937	1.59059	0	109.376	19.7895	6.73975
	8am	46	OF	1201.02	401.128	427.432	970.424	541.308	488.473	2081.68	437.979	26.4537	140.568	226.044	71.5429	170.876	29.3807	7214.3	1358.11	135.845
	8am	46	DS	980.947	363.336	363.198	737.531	343.223	393.208	1679	360.813	22.9017	130.631	190.018	57.0828	144.625	35.2426	5801.75	1070.44	113.031
	8am	46	Gage	453.485	142.873	211.258	382.568	30.742	204.474	1370.7	204.481	15.5483	43.5224	116.536	28.5533	90.4727	30.1652	3325.38	94.6677	32.3718
2019-07-16	12pm	50hr	US	18.7853	2.97962	6.6536	87.0708	8.8057	5.1481	40.8156	4.64167	0.299672	0.912626	1.01315	0.0707663	0.0867047	0	177.283	42.7962	5.81535
	12pm	50	OF	1253.83	418.811	465.102	4104.63	553.777	728.205	2111.66	438.365	87.1268	163.323	264.251	56.525	189.747	78.6843	10914	1028.44	118.542
	12pm	50	DS	1028.1	325.948	366.721	2974.37	343.594	527.84	1842.57	362.484	76.4161	128.969	189.782	47.146	157.2	59.7523	8430.89	863.778	94.3555
	12pm	50	Gage	418.725	171.757	186.089	1873.88	32.1295	192.769	1197.63	186.594	45.9891	60.8411	96.2525	23.3903	77.189	20.1044	4583.34	125.051	38.5705
2019-07-16	7pm	57hr	US	20.9488	3.42736	7.82898	140.293	10.072	7.56793	45.5401	4.87869	0.0391004	0.888854	1.26851	0.162838	2.34916	0	245.266	26.5464	5.2186
	7pm	57	OF	1216.85	393.157	352.839	2628.67	551.547	472.149	2170.03	406.724	108.828	157.611	201.828	49.7567	185.024	56.052	8951.07	668.491	96.5617
	7pm	57	DS	1054.55	345.712	285.388	2733.69	411.158	410.745	1896.12	358.12	108.124	128.966	169.657	45.0833	167.285	40.2365	8154.84	595.05	76.1754
	7pm	57	Gage	485.622	199.906	230.422	1617.8	44.4147	165.615	1247.62	222.173	43.915	79.1676	102.52	33.1642	92.331	28.2042	4592.87	542.799	57.0971
2019-07-17	8am	70hr	US	15.1492	2.03732	6.21126	54.6693	6.63386	4.84959	29.7158	3.04375	0.455912	0.709754	0.683409	0.0542806	1.51033	0	125.724	80.5446	5.00241
	8am	70	OF	1192.28	393.369	515.014	2148.25	537.496	519.812	1981.57	481.749	118.266	147.211	193.907	66.7333	167.363	50.8084	8513.84	353.039	67.1099
	8am	70	DS	999.928	325.212	420.138	1765.86	376.195	424.612	1715.95	403.872	52.6597	114.872	154.376	51.0072	138.805	27.8662	6971.35	322.543	39.715
	8am	70	Gage	462.922	224.646	253.637	635.935	34.9716	214.039	1398.61	213.558	75.3425	79.8151	107.326	20.7453	91.0713	40.9677	3853.58	275.679	41.9467
2019-07-17	12pm	74hr	US	29.1762	5.17749	7.67912	166.255	14.4211	8.53429	78.2776	8.9412	0.668909	1.8093	1.76394	0.242619	3.49102	0	326.438	66.3413	4.72759
	12pm	74	OF	1307.27	394.956	468.003	1177.82	560.594	641.552	2088.35	456.327	83.2673	151.524	212.377	88.5649	185.512	80.9631	7897.09	298.235	53.0152
	12pm	74	DS	1049.16	360.564	366.498	1050.45	390.202	507.704	2014.15	376.535	107.485	125.641	180.286	75.2056	149.546	49.7787	6803.21	252.594	46.1738
	12pm	74	Gage	422.667	186.705	163.91	1193.68	34.1136	199.051	1176.57	203.308	59.6576	64.0032	92.4686	16.3803	73.9883	18.5696	3905.07	252.125	32.4644
2019-07-17	7pm	81hr	US	53.021	7.12623	21.3475	149.998	26.6728	21.3129	119.321	18.3878	0.109634	2.98907	4.11922	0.210047	7.85478	0	432.469	90.8497	49.0893
	7pm	81	OF	1333.06	408.343	303.498	2468.61	552.21	573.769	2413.36	420.837	70.3544	162.051	201.245	62.3878	188.251	35.4735	9193.44	325.987	49.6564
	7pm	81	DS	283.583	128.069	156.764	1219.78	17.9569	158.517	775.116	128.7	27.2673	42.0732	59.7865	24.6983	52.5091	17.7363	3092.56	121.038	18.3294
	7pm	81	Gage	447.872	124.379	125.047	1862.4	104.869	209.073	1089.03	146.29	42.1854	40.5632	65.4469	22.0092	64.4167	33.8712	4377.45	166.336	56.3395
2019-07-18	8am	94hr	US	21.0515	2.44563	16.8099	108.558	8.68994	5.42329	47.303	5.06576	0.487519	0.745915	1.01561	0.133331	2.72187	0	220.452	59.4769	30.5509
	8am	94	OF	1296.23	401.526	558.506	2462.21	578.8	683.366	1961.43	409.273	104.272	148.696	212.172	88.9038	189.892	54.5988	9149.87	350.824	67.5279
	8am	94	DS	935.391	295.611	367.632	2026.45	337.675	461.632	1707.24	297.088	68.4373	114.056	142.35	54.9422	135.695	24.7354	6968.93	266.98	62.3408
	8am	94	Gage	371.941	155.908	144.674	1998.11	38.4637	185.191	915.504	147.609	19.1322	52.4712	70.7546	19.1901	64.6297	13.1959	4196.78	126.698	21.9097
				**Concentrations in units of ng/L**

## Sheet: Field Parameters
Date	Time	Site	pH	water temperature ©	conductivity(us/cm)	DO (mg/L)	Flow(ft3/sec)
43660	10am	US1	7.77	23.9	761	9.53
	10am	effluent	7.51	20.7	1840	8.11
	10am	DS1	7.69	21.5	1658	8.47
	10am	DS2	8.06	22	1090	8.24	2.29
43660	7pm	US1	7.6	25	582	6.78
	7pm	effluent	7.64	20.6	1716	8.17
	7pm	DS1	7.72	21.2	1548	8.07
	7pm	DS2	8.25	26.2	1300	7.49	3.73
43661	8am	US1	7.55	21.8	769	6.86
	8am	effluent	7.68	20.3	1916	8.37
	8am	DS1	7.64	20.6	1776	8.24
	8am	DS2	8.05	21.6	1186	8.17	2.72
43661	12pm	US1	7.77	23.9	766	9.56
	12pm	effluent	7.77	20.8	1907	8.4
	12pm	DS1	7.8	21.7	1777	8.79
	12pm	DS2	8.24	24.5	1067	8.91	3.55
43661	7pm	US1	7.68	23.9	NA	6.86
	7pm	effluent	7.65	21	1807	8.29
	7pm	DS1	7.78	21.3	1607	8.08
	7pm	DS2	8.2	25.4	1359	7.69	2.87
43662	8am	US1	7.68	21.2	771	7.31
	8am	effluent	7.71	20.4	1878	8.58
	8am	DS1	7.81	20.4	1703	8.41
	8am	DS2	8.02	20.8	1153	8.16	2.43
43662	12pm	US1	7.76	22.7	762	9.82
	12pm	effluent	7.67	20.7	1888	8.32
	12pm	DS1	7.84	21.3	1646	8.82
	12pm	DS2	8.16	23.1	1064	NA	3.55
43662	7pm	US1	7.69	24.1	760	7.18
	7pm	effluent	7.81	20.8	1917	8.48
	7pm	DS1	7.96	21.4	1699	8.25
	7pm	DS2	8.2	25.5	1255	7.81	2.87
43663	8am	US1	7.84	21.5	774	6.94
	8am	effluent	7.85	20.8	1804	8.56
	8am	DS1	7.92	20.8	1643	8.34
	8am	DS2	8.13	21.8	1192	8.1	2.57
43663	12pm	US1	8.05	24.1	773	10.55
	12pm	effluent	8.02	21.1	NA	NA
	12pm	DS1	8.04	21.5	1647	9.29
	12pm	DS2	8.37	23.7	1051	8.88	3.73
43663	7pm	US1	8.06	23.9	642	6.53
	7pm	effluent	8.04	20.8	1771	8.57
	7pm	DS1	8.02	22.6	917	7.49
	7pm	DS2	8.24	22.6	866	7.82	7.05
43664	8am	US1	7.56	21.8	718	6.69
	8am	effluent	7.82	20.2	1782	8.69
	8am	DS1	7.82	20.7	1459	8.17
	8am	DS2	8.05	21.3	904	8.11	3.73
43664	12pm	DS2	8.06	23.3	874	8.62	4.74

## Sheet: Metformin
Date	Time	Location	Metformin (ng/L)		DS1 Summary
					Date	Time	Metformin (ng/L)
2019-07-14	10am	US1	7.55239
	10am	effluent	615.279		7/14	10am	1257.62
	10am	DS1	1257.62			7pm	363.232
	10am	DS2	188.964		7/15	8am	408.302
2019-07-14	7pm	US1	3.68451			12pm	780.767
	7pm	effluent	402.899			7pm	276.391
	7pm	DS1	363.232		7/16	8am	363.198
	7pm	DS2	244.237			12pm	366.721
2019-07-15	8am	US1	3.33915			7pm	285.388
	8am	effluent	480.242		7/17	8am	420.138
	8am	DS1	408.302			12pm	366.498
	8am	DS2	263.29			7pm	156.764
2019-07-15	12pm	US1	3.63396		7/18	8am	367.632
	12pm	effluent	917.504
	12pm	DS1	780.767		US1 Summary
	12pm	DS2	217.211		Date	Time	Metformin (ng/L)
2019-07-15	7pm	US1	5.41586
	7pm	effluent	357.894		7/14	10am	7.55239
	7pm	DS1	276.391			7pm	3.68451
	7pm	DS2	299.992		7/15	8am	3.33915
2019-07-16	8am	US1	5.83723			12pm	3.63396
	8am	effluent	427.432			7pm	5.41586
	8am	DS1	363.198		7/16	8am	5.83723
	8am	DS2	211.258			12pm	6.6536
2019-07-16	12pm	US1	6.6536			7pm	7.82898
	12pm	effluent	465.102		7/17	8am	6.21126
	12pm	DS1	366.721			12pm	7.67912
	12pm	DS2	186.089			7pm	21.3475
2019-07-16	7pm	US1	7.82898		7/18	8am	16.8099
	7pm	effluent	352.839
	7pm	DS1	285.388
	7pm	DS2	230.422
2019-07-17	8am	US1	6.21126
	8am	effluent	515.014
	8am	DS1	420.138
	8am	DS2	253.637
2019-07-17	12pm	US1	7.67912
	12pm	effluent	468.003
	12pm	DS1	366.498
	12pm	DS2	163.91
2019-07-17	7pm	US1	21.3475
	7pm	effluent	303.498
	7pm	DS1	156.764
	7pm	DS2	125.047
2019-07-18	8am	US1	16.8099
	8am	effluent	558.506
	8am	DS1	367.632
	8am	DS2	144.674
